# Supplementary material for: Diagnostic Potential of Endometrial Cancer DNA from Pipelle, Pap-Brush, and Swab Sampling
Source: Cancers (Basel). 2023 Jul 6;15(13):3522. doi: 10.3390/cancers15133522 (PMC10340240; doi:10.3390/cancers15133522)
Supplement: Supplementary file 1 [file cancers-15-03522-s001.zip › Supplementary Tables.xlsx]

## Sheet: Table S1
Table S1. Clinical information of 38 patients with endometrial carcinoma and 249 women at high risk
Group	Patient_ID	Age	BMI	Blood pressure (mmHg)	Histological subtype	lymph node metastasis	Sample type (sampling method)					Vaginal bleeding	Menstrual history							History of Pregnancy								Hypertension	Diabetes mellitus	Personal history of cancer	Family history of cancer	Gynaecologic examination			Color ultrasound of gynecology
							Vaginal exfoliated cells (vaginal swab)	Cervical exfoliative cells (cervical brush)	Endometrial tissue (Pipelle catheter)	Tumor tissue (surgery)	Normal tissue (surgery)	0=vaginal bleeding after menopause, 1=irregular vaginal bleeding, 2=abnormal vaginal bleeding, 3=others	Age at menarche (year)	Cycle (day)	Period (day)	Volumes (0=much, 1=moderate, 2=few)	Last menstruation	Menopause	Age at menopause (year)	Marital status	Age of marriage (year)	Gravidity	Parity	Miscarriages	Age of initial pregnancy (year)	Age of first delivery (year)	Age of last pregnancy (year)					Vaginal bleeding	Cervix	Bilateral adnexa	Endometrial thickness (mm)	Endometrium	Space-occupying lesions	Blood flow signal	Uterine
cancer	EC140	47	21.8	125/75	endometrioid adenocarcinoma (Grade 1)	LNM-	No	Yes	Yes	Yes	Yes	1	Unknown	25	6.5	1	2016	No	N/A	Yes	30	1	0	0	43	N/A	43	No	No	No	No	No	Normal	Normal	22	heterogeneous	No	Unknown	Normal
cancer	EC192	64	24.5	100/75	papillary serous adenocarcinomas	LNM+ (left internaliliac lymph nodes)	No	No	No	Yes	Yes	1	14	30	7	1	Unknown	Yes	50	Yes	26	4	2	2	27	27	30	No	No	No	No	No	Normal	Normal	13	heterogeneous	No	Rich	Reduced
cancer	EC195	39	24.8	110/80	mixed carcinomas (papillary serous and clear cell adenocarcinomas)	LNM-	No	Yes	No	Yes	Yes	1	13	28	6	0	2017.8.4	No	N/A	Yes	24	4	1	3	21	24	35	No	No	No	gynecologic cancer (mother)	No	Normal	Normal	8.4	heterogeneous	No	No	Normal
risk	EC201	52	21.2	110/80	endometrial polyp	N/A	Yes	No	Yes	No	No	1	15	28	7	1	Unknown	Yes	50	Yes	26	3	2	1	27	28	32	Yes	No	No	No	No	Normal	Normal	6.5	heterogeneous	Yes	No	Enlarged
cancer	EC211	38	20.8	100/70	endometrioid adenocarcinoma	LNM-	Yes	Yes	No	Yes	Yes	1	13	30	6.5	0	2017.8.10	No	N/A	No	Unknown	0	0	0	N/A	N/A	N/A	No	No	No	Unknown	No	Normal	Normal	22	heterogeneous	No	Rich	Normal
cancer	EC284	43	26.7	120/80	endometrioid adenocarcinoma	LNM+ (left internaliliac lymph nodes)	No	Yes	Yes	Yes	Yes	/	14	30	5	1	2017.10.2	No	N/A	Yes	21	2	2	0	21	22	24	No	No	No	No	Yes	Normal	Abnormal	Unknown	homogenous	No	spot-like	Normal
cancer	EC287	64	24.2	100/70	papillary serous adenocarcinomas	LNM-	No	Yes	Yes	Yes	Yes	2	15	28	4.5	0	Unknown	Yes	51	Yes	27	3	2	1	26	27	31	No	No	No	bowel cancer (father) and oesophagus cancer (brother)	No	Normal	Abnormal	6	homogenous	Yes	spot-like	postmenopausal uterine
cancer	EC288	60	26.4	130/80	endometrioid adenocarcinoma (Grade 1)	LNM-	No	Yes	Yes	Yes	Yes	1	15	30	6	1	2013.1.1	Yes	53	Yes	21	3	2	1	21	22	22	No	No	No	No	Yes	Normal	Normal	14	heterogeneous	Yes	spot-like	postmenopausal uterine
cancer	EC291	57	25.4	100/73	endometrioid adenocarcinoma	LNM-	Yes	Yes	Yes	Yes	Yes	1	Unknown	Unknown	Unknown	Unknown	Unknown	Yes	51	Yes	25	2	1	1	24	26	25	No	No	No	rectal cancers (mother) and liver cancer (maternal uncle)	No	Normal	Normal	Unknown	heterogeneous	No	Rich	Enlarged
cancer	EC301	65	25.7	150/71	endometrial clear cell carcinoma	LNM-	Yes	Yes	Yes	Yes	Yes	0	14	30	7	1	Unknown	Yes	55	Yes	22	1	1	0	20	21	20	Yes	No	No	No	No	Normal	Normal	12	heterogeneous	No	No	Reduced
cancer	EC306	57	23.4	140/75	endometrioid adenocarcinoma (Grade 2)	LNM-	Yes	Yes	Yes	Yes	Yes	1	20	30-37	6	1	Unknown	Yes	54	Yes	22	6	4	2	22	23	28	Yes	No	No	rectal cancers (father)	No	Reduced	Normal	Unknown	Unknown	No	Unknown	Unknown
risk	EC307	70	28.4	145/80	fragment of glandular	Unknown	Yes	Yes	Yes	No	No	1	12	30	7	1	Unknown	Yes	50	Yes	24	2	1	1	24	24	25	Yes	No	No	Unknown	Yes	Normal	Normal	16	heterogeneous	No	Rich	postmenopausal uterine
risk	EC308	66	21.6	134/85	HPV-infected	Unknown	Yes	Yes	No	No	No	1	Unknown	Unknown	Unknown	Unknown	Unknown	Yes	50	Yes	Unknown	4	2	2	26	26	47	Yes	No	breast cancer	No	Yes	Reduced	Unknown	2	heterogeneous	No	Rich	Reduced
cancer	EC310	55	25	Unknown	endometrioid adenocarcinoma	LNM-	Yes	Yes	Yes	Yes	Yes	2	Unknown	3	30	2	Unknown	Yes	53	Yes	25	4	4	0	25	26	28	Yes	No	No	No	Yes	Reduced	Normal	Unknown	Unknown	No	Unknown	Normal
cancer	EC311	63	18	120/70	papillary serous adenocarcinomas	LNM-	No	No	Yes	Yes	Yes	2	Unknown	30	4.5	1	Unknown	Yes	50	Yes	28	5	1	4	31	31	30	No	No	No	No	No	Reduced	Normal	Unknown	Unknown	Yes	spot-like	Reduced
cancer	EC312	55	19.6	108/68	endometrioid adenocarcinoma	LNM-	No	Yes	Yes	Yes	Yes	0	Unknown	3-7	28	1	Unknown	Yes	52	Yes	24	3	1	2	24	25	27	No	No	No	No	No	Normal	Abnormal	13	Unknown	No	No	Unknown
cancer	EC313	65	Unknown	160/85	papillary serous adenocarcinomas	LNM-	Yes	No	Yes	Yes	Yes	0	13	/	3	1	Unknown	Yes	58	Yes	27	4	2	2	28	28	33	Yes	No	No	No	No	Normal	Normal	12	heterogeneous	No	No	Reduced
cancer	EC315	53	25.8	127/80	papillary serous adenocarcinomas	Unknown	Yes	Yes	Yes	Yes	Yes	0	16	40	2	1	Unknown	Yes	51	Yes	23	4	2	0	23	24	27	No	No	No	No	Yes	Normal	Normal	16	heterogeneous	No	strip-like	Normal
cancer	EC316	59	24	100/80	endometrial clear cell carcinoma	LNM-	Yes	Yes	Yes	Yes	Yes	1	15	30	4.5	Unknown	Unknown	Yes	57	Yes	20	3	3	0	20	21	26	No	No	No	No	Yes	Erosions	Normal	Unknown	Unknown	No	Unknown	Normal
cancer	EC317	60	25.6	124/73	endometrioid adenocarcinoma	LNM-	No	Yes	Yes	Yes	Yes	1	14	28-30	6	1	Unknown	Yes	53	Yes	25	5	3	2	24	25	28	No	No	No	gastric cancer (brother)	Yes	Reduced	Normal	Unknown	Unknown	No	Unknown	Normal
cancer	EC318	44	21.5	180/109	endometrioid adenocarcinoma	Unknown	Yes	Yes	No	Yes	Yes	1	13	28-37	3	1	2018.8.20	No	N/A	Yes	23	4	3	1	23	24	36	Yes	Yes	No	No	No	Normal	Normal	Unknown	Unknown	No	Unknown	Normal
cancer	EC319	56	25.6	110/80	endometrioid adenocarcinoma	LNM-	Yes	Yes	Yes	Yes	Yes	0	15	30	5	1	Unknown	Yes	53	Yes	22	7	6	1	23	23	29	No	Yes	No	No	No	Normal	Normal	9	Unknown	No	Unknown	Normal
cancer	EC320	65	23	Unknown	endometrioid adenocarcinoma	LNM-	No	Yes	Yes	Yes	Yes	0	Unknown	30	5	1	Unknown	Yes	51	Yes	24	2	2	0	25	25	27	Yes	No	No	No	No	Reduced	Normal	Unknown	Unknown	No	Unknown	Normal
cancer	EC321	52	24.8	125/87	endometrial clear cell carcinoma	LNM-	Yes	Yes	Yes	Yes	Yes	0	15	30	6	1	Unknown	Yes	49	Yes	23	4	3	1	23	24	27	Yes	No	colon cancer	colon cancer (father)	Yes	Reduced	Normal	12	homogenous	No	Unknown	Normal
cancer	EC322	56	19.5	Unknown	endometrioid adenocarcinoma	LNM-	No	Yes	Yes	Yes	Yes	0	13	28	3	1	Unknown	Yes	43	Yes	19	3	2	1	20	21	23	No	No	No	No	Yes	Normal	Abnormal	Unknown	Unknown	Unknown	Unknown	Normal
cancer	EC323	52	Unknown	Unknown	endometrioid adenocarcinoma	LNM-	No	No	Yes	Yes	Yes	1	11	30	3.5	1	2018.9.2	No	N/A	Yes	24	2	1	1	26	27	28	No	No	No	No	No	Enlarged	Normal	9	heterogeneous	Yes	Unknown	Normal
cancer	EC324	62	23.4	110/80	endometrioid adenocarcinoma	LNM-	Yes	Yes	Yes	Yes	Yes	0	Unknown	30	7	1	Unknown	Yes	55	Yes	23	3	2	1	24	24	35	No	No	No	No	Yes	Normal	Unknown	Unknown	Unknown	Yes	Rich	Enlarged
cancer	EC325	64	21.6	128/70	endometrioid adenocarcinoma	LNM-	Yes	Yes	Yes	Yes	Yes	0	15	30	7	Unknown	Unknown	Yes	47	Yes	23	3	2	1	23	24	30	Yes	Yes	ovarian cancer	No	Yes	Reduced	Unknown	Unknown	Unknown	Unknown	strip-like	postmenopausal uterine
cancer	EC326	63	21.9	Unknown	papillary serous adenocarcinomas	LNM-	Yes	Yes	Yes	Yes	Yes	0	13	30	7	0	Unknown	Yes	53	Yes	21	3	3	0	23	25	27	No	No	Unknown	No	Yes	Reduced	Normal	Unknown	Unknown	Unknown	No	Unknown
cancer	EC328	60	24	100/80	endometrioid adenocarcinoma	LNM-	No	Yes	Yes	Yes	Yes	0	Unknown	30	5	1	Unknown	Yes	52	Yes	20	2	2	0	22	23	25	No	No	No	No	No	Normal	Normal	19	heterogeneous	Unknown	No	Reduced
cancer	EC329	39	22.4	100/80	endometrioid adenocarcinoma	LNM-	Yes	Yes	Yes	Yes	Yes	2	13	30	5	2	2.18.12.12	No	N/A	Yes	31	0	0	0	N/A	N/A	N/A	Unknown	Unknown	Unknown	No	Yes	Normal	Normal	8	heterogeneous	Unknown	No	Normal
cancer	EC330	63	Unknown	157/97	endometrioid adenocarcinoma (Grade 1)	LNM-	No	Yes	No	Yes	Yes	1	13	25-30	5.5	1	Unknown	Yes	53	Yes	21	4	1	3	21	22	38	Yes	No	No	lymphoma (mother)	No	Normal	Normal	22	heterogeneous	No	No	Reduced
cancer	EC331	45	23.2	120/80	endometrioid adenocarcinoma	LNM-	Yes	No	No	Yes	Yes	1	13	30	5	1	2019.2.27	No	N/A	Yes	22	4	4	0	24	25	38	No	No	No	No	Yes	Normal	Normal	7	heterogeneous	No	No	Normal
cancer	EC332	34	18	108/80	endometrioid adenocarcinoma	Unknown	No	Yes	No	Yes	Yes	1	14	30	8.5	1	2019.2.26	No	N/A	Yes	27	1	1	0	29	29	29	No	No	No	No	Yes	Normal	Normal	27	Unknown	No	No	Normal
cancer	EC333	62	16.6	110/80	endometrioid adenocarcinoma	LNM-	No	Yes	Yes	Yes	Yes	1	14	30	7	1	Unknown	Yes	50	Yes	25	5	1	4	27	27	30	No	No	No	No	Yes	Normal	Normal	Unknown	Unknown	No	No	Normal
cancer	EC334	52	23.8	Unknown	endometrioid adenocarcinoma	LNM-	No	No	No	Yes	Yes	1	14	28-30	5	Unknown	Unknown	No	N/A	Yes	26	2	1	0	26	27	27	No	No	breast cancer	No	Yes	Unknown	Normal	Unknown	heterogeneous	No	strip-like	Enlarged
cancer	EC337	49	Unknown	Unknown	mixed carcinomas (endometrioid adenocarcinoma and mucinous carcinoma)	Unknown	No	No	No	Yes	Yes	Unknown	Unknown	Unknown	Unknown	Unknown	Unknown	Yes	Unknown	Unknown	Unknown	Unknown	Unknown	Unknown	Unknown	Unknown	Unknown	No	No	No	No	No	Normal	Normal	Unknown	Unknown	Unknown	Unknown	Unknown
risk	EC338	Unknown	Unknown	Unknown	Unknown	Unknown	Yes	Yes	Yes	No	No	Unknown	Unknown	Unknown	Unknown	Unknown	Unknown	Unknown	Unknown	Unknown	Unknown	Unknown	Unknown	Unknown	Unknown	Unknown	Unknown	Unknown	Unknown	Unknown	Unknown	Unknown	Unknown	Unknown	Unknown	Unknown	Unknown	Unknown	Unknown
cancer	EC341	Unknown	Unknown	Unknown	endometrioid adenocarcinoma	Unknown	No	No	No	Yes	Yes	Unknown	Unknown	Unknown	Unknown	Unknown	Unknown	Unknown	Unknown	Unknown	Unknown	Unknown	Unknown	Unknown	Unknown	Unknown	Unknown	Unknown	Unknown	Unknown	Unknown	Unknown	Unknown	Unknown	Unknown	Unknown	Unknown	Unknown	Unknown
cancer	EC342	48	26.7	115/72	endometrioid adenocarcinoma	Unknown	No	No	No	Yes	Yes	/	17	30	6	1	2019.10.1	No	N/A	Yes	22	4	2	2	23	23	31	No	No	No	No	No	Normal	Normal	14	heterogeneous	No	strip-like	Enlarged
cancer	EC343	61	25.4	118/70	endometrioid adenocarcinoma (Grade 1)	LNM-	Yes	Yes	Yes	Yes	Yes	0	14	30	6	1	Unknown	Yes	55	Yes	25	2	1	1	26	27	26	Yes	No	No	No	Yes	Unknown	Unknown	Unknown	heterogeneous	Unknown	Unknown	Unknown
cancer	EC344	33	30.5	Unknown	endometrioid adenocarcinoma (Grade 1)	Unknown	Yes	Yes	Yes	Yes	Yes	1	12	30	7	1	2019.12.13	No	N/A	Yes	23	1	1	0	27	27	27	No	Yes	No	leukemia (aunt)	Yes	Normal	Normal	16	heterogeneous	No	No	Normal
risk	EC039	60	25.6	110/80	Unknown	N/A	Yes	Yes	Yes	No	No	1	14	25-30	5-7	0	Unknown	Yes	54	Yes	23	4	2	2	23	24	26	No	No	No	breast cancer (sister)	No	Polyp	Normal	15	heterogeneous	No	unknown	Postmenopausal uterine, reduced
risk	EC042	34	21.9	110/80	Unknown	N/A	Yes	No	Yes	No	No	1	16	30-180	7	1	2017.1.1	No	N/A	Yes	27	1	1	0	30	31	30	No	No	No	No	No	Normal	Normal	7	homogenous	No	unknown	Normal
risk	EC045	49	22.6	150/90	Unknown	N/A	Yes	No	Yes	No	No	/	18	30	3-4	1	Unknown	Yes	42	Yes	20	5	4	1	22	22	29	Yes	Yes	No	No	No	Normal	Normal	8	heterogeneous	No	unknown	postmenopausal uterine
risk	EC046	54	22.1	120/75	Unknown	N/A	No	Yes	Yes	No	No	1	17	10-30	7-15	1	2017.2.2	No	N/A	Yes	24	3	3	0	24	25	30	Yes	Yes	No	liver cancer (father)	Yes	Normal	Normal	7	heterogeneous	No	unknown	Enlarged
risk	EC047	39	21.6	130/80	Unknown	N/A	No	Yes	Yes	No	No	1	15	22-28	4-7	1	2017.1.26	No	N/A	Yes	24	5	3	2	24	25	35	No	Unknown	No	No	Yes	Normal	Normal	6	heterogeneous	No	unknown	Normal
risk	EC048	44	20.4	120/80	Unknown	N/A	Yes	Yes	No	No	No	1	/	30	4-5	1	2017.1.20	No	N/A	Yes	22	4	2	2	22	22	32	No	Unknown	No	No	Yes	Normal	Abnormal	unknown	homogenous	Yes	unknown	Enlarged
risk	EC049	43	21.8	120/80	Unknown	N/A	Yes	Yes	Yes	No	No	1	12	25-26	7-12	1	2017.1.7	No	N/A	Yes	25	4	1	3	19	25	26	No	Unknown	No	No	Yes	Normal	Normal	10	heterogeneous	Yes	unknown	Normal
risk	EC050	42	Unknown	Unknown	Unknown	N/A	No	Yes	Yes	No	No	Unknown	Unknown	Unknown	Unknown	Unknown	Unknown	Unknown	Unknown	Unknown	Unknown	Unknown	Unknown	Unknown	Unknown	Unknown	Unknown	Unknown	Unknown	No	Unknown	Unknown	Unknown	Unknown	Unknown	Unknown	Unknown	Unknown	Unknown
risk	EC051	49	Unknown	110/75	Unknown	N/A	Yes	Yes	Yes	No	No	/	11	30	4	1	2017.2.10	No	N/A	Yes	Unknown	4	1	3	19	22	24	No	Unknown	No	No	No	Normal	Normal	5	heterogeneous	No	unknown	Enlarged
risk	EC052	51	24.5	130/80	Unknown	N/A	Yes	Yes	No	No	No	1	16	25	5-6	1	2015.5	Yes	50	Yes	23	2	1	1	23	24	28	No	Unknown	No	No	No	Normal	Normal	8	heterogeneous	No	unknown	Enlarged
risk	EC053	43	22.6	120/75	Unknown	N/A	No	Yes	Yes	No	No	1	12	30	6-15	0	2017.1.17	No	N/A	Yes	22	4	2	2	24	25	42	No	Unknown	No	No	Yes	Normal	Normal	unknown	heterogeneous	No	unknown	Enlarged
risk	EC054	48	22.2	110/70	Unknown	N/A	Yes	Yes	Yes	No	No	1	15	30	3-30	1	2016.12.25	Yes	Unknown	Yes	20	2	2	0	20	20	22	No	Unknown	No	No	Yes	Normal	Normal	unknown	heterogeneous	No	unknown	Enlarged
risk	EC055	47	23.4	120/70	Unknown	N/A	Yes	Yes	Yes	No	No	/	12	21-30	5-8	1	2017.1.29	No	N/A	Yes	25	3	2	1	25	25	35	No	Unknown	No	No	No	Normal	Abnormal	9	homogenous	No	unknown	Normal
risk	EC056	47	19.2	130/85	Unknown	N/A	Yes	Yes	Yes	No	No	/	14	30	7-26	1	2017.1.24	No	N/A	Yes	20	6	2	4	21	22	30	No	Unknown	No	No	No	Normal	Abnormal	17	heterogeneous	No	unknown	Enlarged
risk	EC057	44	26	120/85	Unknown	N/A	No	Yes	Yes	No	No	1	14	30-37	5-7	1	2017.2.3	No	N/A	Yes	24	1	1	0	28	28	28	No	Unknown	No	No	No	Enlarged	Normal	17	heterogeneous	No	unknown	Enlarged
risk	EC058	26	Unknown	120/70	Unknown	N/A	No	Yes	Yes	No	No	1	15	28	7-30	0	2017.1.30	No	N/A	Yes	25	0	0	0	N/A	N/A	N/A	No	Unknown	No	No	Yes	Normal	Abnormal	23	heterogeneous	No	unknown	Normal
risk	EC059	49	28.6	100/60	Unknown	N/A	No	No	Yes	No	No	1	13	20-28	5-30	1	2016.10.1	No	N/A	Yes	21	4	1	3	22	22	Unknown	No	Unknown	No	diabetes (mother)	Yes	Normal	Abnormal	19	unknown	No	unknown	Normal
risk	EC061	37	19.1	100/90	Unknown	N/A	Yes	Yes	Yes	No	No	1	12	28-30	5-10	0	2016.2.16	No	N/A	Yes	23	1	1	0	28	29	29	No	Unknown	No	No	Yes	Normal	Normal	16	heterogeneous	No	unknown	Normal
risk	EC062	Unknown	26.7	130/92	Unknown	N/A	No	Yes	Yes	No	No	1	14	16-30	3-10	0	2016.12.10	No	N/A	Yes	20	7	5	2	20	21	35	Yes	Unknown	No	No	Yes	Normal	Normal	unknown	unknown	No	unknown	Normal
risk	EC063	50	18.4	110/75	Unknown	N/A	Yes	Yes	Yes	No	No	1	15	30	3-4	1	2017.2.1	No	N/A	Yes	21	2	2	0	21	21	24	No	Unknown	No	No	Yes	Normal	Normal	unknown	heterogeneous	No	unknown	Enlarged
risk	EC066	46	27.8	188/106	Unknown	N/A	Yes	Yes	No	No	No	1	17	60-90	4-5	1	2016.12	No	N/A	Yes	26	4	3	1	26	26	33	Yes	Unknown	No	No	Yes	Normal	Normal	15	heterogeneous	No	unknown	Normal
risk	EC067	40	21.4	110/70	Unknown	N/A	Yes	Yes	Yes	No	No	1	12	28	5-7	1	2016.12	No	N/A	Yes	26	3	2	1	28	28	38	No	Unknown	No	No	Yes	Enlarged	Normal	17	heterogeneous	No	unknown	Normal
risk	EC068	27	16.9	110/75	Unknown	N/A	No	No	Yes	No	No	1	12	10-45	10-15	1	2017.2.11	No	N/A	Yes	26	0	0	0	N/A	N/A	N/A	No	Unknown	No	No	Yes	Normal	Normal	16	heterogeneous	No	unknown	Normal
risk	EC069	33	22.9	110/75	Unknown	N/A	No	Yes	Yes	No	No	/	17	27-30	7	0	2017.2.28	No	N/A	Yes	26	2	2	0	26	27	30	No	Unknown	No	No	Yes	Normal	Normal	19	heterogeneous	No	unknown	Normal
risk	EC070	37	26	110/75	Unknown	N/A	No	Yes	Yes	No	No	/	13	30-50	7	0	2017.2.3	No	N/A	Yes	26	1	1	0	27	28	27	No	No	No	No	No	Erosions	Normal	17	heterogeneous	No	unknown	Enlarged
risk	EC071	53	25.5	110/70	Unknown	N/A	Yes	Yes	Yes	No	No	1	17	30	3-7	1	2013	Yes	49	Yes	20	4	4	0	21	21	27	No	No	No	No	No	Normal	Normal	15	heterogeneous	No	unknown	Normal
risk	EC072	24	18.1	130/85	Unknown	N/A	No	No	Yes	No	No	1	13	30	6-7	1	2017.3.1	No	N/A	Yes	22	1	1	0	23	24	23	No	No	No	No	Yes	Normal	Normal	16	heterogeneous	No	unknown	Normal
risk	EC073	24	17.6	110/75	Unknown	N/A	No	Yes	Yes	No	No	1	14	23-45	7	1	2017.2.19	No	N/A	Yes	24	0	0	0	N/A	N/A	N/A	No	No	No	No	Yes	Normal	Normal	16	heterogeneous	No	unknown	Normal
risk	EC079	31	20.3	110/75	Unknown	N/A	Yes	Yes	Yes	No	No	1	14	30-60	7-45	0	2017.2.1	No	N/A	Yes	20	2	2	0	20	21	23	No	No	No	No	Yes	Enlarged	Normal	18	heterogeneous	No	unknown	Normal
risk	EC081	45	24.7	120/80	Unknown	N/A	Yes	No	Yes	No	No	1	14	25-30	7-20	0	2017.1.7	No	N/A	Yes	19	2	2	0	20	20	21	No	No	No	No	Yes	Normal	Normal	17	heterogeneous	No	unknown	Normal
risk	EC086	38	26.7	120/80	Unknown	N/A	Yes	Yes	Yes	No	No	/	13	26	3	1	2016.1.3	No	N/A	Yes	Unknown	2	2	0	Unknown	Unknown	Unknown	No	No	breast cancer	No	No	Normal	Normal	3.5	unknown	Yes	unknown	Reduced
risk	EC087	55	25.6	110/75	Unknown	N/A	Yes	Yes	Yes	No	No	Unknown	17	30	8-365	1	2016.6.1	No	N/A	Yes	23	3	3	0	23	23	27	No	No	No	No	Yes	Normal	Normal	21	heterogeneous	No	unknown	Normal
risk	EC088	62	32.4	110/70	Unknown	N/A	Yes	Yes	Yes	No	No	2	15	30	7	1	Unknown	Yes	Unknown	Yes	26	2	1	1	27	28	29	No	No	No	No	No	Normal	Normal	unknown	heterogeneous	Yes	Yes	Reduced
risk	EC089	44	22.6	120/85	Unknown	N/A	Yes	Yes	Yes	No	No	1	13	30	6	0	2017.3.15	No	N/A	Yes	28	1	1	0	28	28	28	Yes	No	No	No	Yes	Erosions	Abnormal	15	heterogeneous	No	unknown	Normal
risk	EC090	47	26	110/70	Unknown	N/A	Yes	Yes	Yes	No	No	1	14	30-150	7-30	1	2017.3	No	N/A	Yes	23	4	2	2	22	23	28	No	No	No	No	Yes	Normal	Normal	15.6	heterogeneous	No	unknown	Normal
risk	EC094	46	23.3	110/70	Unknown	N/A	Yes	Yes	Yes	No	No	1	15	30	7	1	2017.3.25	No	N/A	Yes	25	2	2	0	Unknown	Unknown	Unknown	No	No	No	No	No	Normal	Normal	16	unknown	No	unknown	Enlarged
risk	EC095	54	22.6	117/69	Unknown	N/A	No	Yes	Yes	No	No	1	17	30	7	1	Unknown	Yes	50	Yes	24	5	2	3	25	26	Unknown	No	No	No	No	No	Normal	Normal	13	homogenous	Yes	unknown	Reduced
risk	EC096	59	22.6	160/85	Unknown	N/A	No	Yes	Yes	No	No	1	15	30	7	1	Unknown	Yes	50	Yes	24	3	3	0	24	25	30	Yes	No	No	No	No	Normal	Normal	10	heterogeneous	Yes	unknown	Postmenopausal uterine, reduced
risk	EC097	23	22.3	110/80	Unknown	N/A	Yes	Yes	Yes	No	No	1	11	30	7-30	0	2017.4.1	No	N/A	Yes	Unknown	Unknown	Unknown	Unknown	Unknown	Unknown	Unknown	No	Unknown	No	No	Yes	Normal	Normal	23	heterogeneous	No	Rich	Normal
risk	EC098	44	23.6	110/80	Unknown	N/A	Yes	Yes	Yes	No	No	1	12	28	7-30	1	2017.3.8	No	N/A	Yes	20	3	1	2	20	21	25	No	Unknown	No	No	Yes	Normal	Normal	14	heterogeneous	No	wire-like	Enlarged
risk	EC099	47	24.2	102/62	Unknown	N/A	No	Yes	Yes	No	No	1	14	20-50	7	0	2017.4.8	No	N/A	Yes	16	1	1	0	15	16	15	No	Unknown	No	No	Yes	Enlarged	Normal	14	heterogeneous	No	unknown	Normal
risk	EC100	42	21.3	110/60	benign cystic glandular hyperplasia	N/A	Yes	Yes	Yes	No	No	/	12	28-60	3-4	0	2017.3.1	No	N/A	Yes	30	3	1	2	32	33	35	No	Unknown	No	No	Yes	Normal	Abnormal	18.6	heterogeneous	Yes	unknown	Normal
risk	EC101	52	25.1	105/60	Unknown	N/A	No	Yes	Yes	No	No	1	/	28-40	7	1	2017.3.2	No	N/A	Yes	27	2	2	0	26	27	37	No	Unknown	No	No	No	Normal	Abnormal	14	heterogeneous	No	unknown	Normal
risk	EC102	39	21.3	110/80	Unknown	N/A	Yes	Yes	No	No	No	1	15	28-40	7-15	0	2017.4.13	No	N/A	Yes	36	2	1	1	19	36	35	No	Unknown	No	No	Yes	Normal	Abnormal	21	heterogeneous	No	strip-like	Enlarged
risk	EC104	58	26	110/70	endometrial hyperplasia	N/A	Yes	Yes	Yes	No	No	1	17	30	7	0	Unknown	Yes	56	Yes	21	2	2	0	22	22	26	No	Unknown	No	No	Yes	Normal	Normal	14	heterogeneous	Yes	unknown	Enlarged
risk	EC105	51	24.2	120/85	benign cystic glandular hyperplasia	N/A	Yes	No	Yes	No	No	1	18	30	7-8	1	2017.4	No	N/A	Yes	22	10	6	5	22	22	38	No	Unknown	No	No	Yes	Normal	Normal	15	heterogeneous	No	unknown	Normal
risk	EC106	48	27.3	90/65	benign cystic glandular hyperplasia	N/A	Yes	Yes	Yes	No	No	1	16	23	7	0	2017.2.4	No	N/A	Yes	26	4	2	2	26	26	32	No	Unknown	No	liver cancer (father)	Yes	Normal	Normal	22.6	heterogeneous	No	unknown	Normal
risk	EC108	36	26.2	130/85	benign cystic glandular hyperplasia	N/A	Yes	Yes	No	No	No	3	13	30	3	2	2017.4.12	No	N/A	Yes	Unknown	4	2	2	18	25	28	No	Unknown	No	No	Yes	Normal	Normal	14	heterogeneous	No	unknown	Normal
risk	EC109	49	24.8	120/70	benign cystic glandular hyperplasia	N/A	No	Yes	No	No	No	1	14	30	3	2	2017.2.5	No	N/A	Yes	Unknown	3	1	2	22	Unknown	32	No	Unknown	No	endometrial carcinoma (sister)	Yes	Normal	Normal	19	homogenous	No	unknown	Normal
risk	EC110	48	21.2	130/80	benign cystic glandular hyperplasia	N/A	Yes	Yes	No	No	No	1	14	30	4	1	2017.5.3	No	N/A	Yes	20	3	1	2	20	Unknown	35	No	Unknown	No	No	Yes	Normal	Abnormal	23	heterogeneous	No	unknown	Normal
risk	EC111	51	24.7	110/70	secretory phase	N/A	Yes	Yes	No	No	No	/	16	30-40	3-7	2	Unknown	Yes	46	Yes	26	1	1	0	26	26	26	No	Unknown	breast cancer	No	No	Normal	Normal	28	heterogeneous	Yes	unknown	postmenopausal uterine
risk	EC112	45	31.1	140/90	HPV-infected	N/A	Yes	Yes	No	No	No	/	16	30-60	5	1	2017.5.15	No	N/A	Yes	24	5	1	4	25	25	43	Yes	Yes	No	No	Yes	Normal	Normal	14	heterogeneous	No	unknown	Normal
risk	EC113	50	21	110/70	proliferative phase	N/A	Yes	Yes	No	No	No	1	19	30	6	1	2017.5.6	No	N/A	Yes	20	3	3	0	20	20	25	No	No	No	No	Yes	Normal	Normal	28	heterogeneous	No	unknown	Normal
risk	EC114	48	21.1	90/60	proliferative phase	N/A	Yes	Yes	No	No	No	1	13	20-28	3-7	1	2017.4.24	No	N/A	Yes	26	3	1	2	27	28	37	No	No	No	cholangiocarcinoma (mother)	Yes	Normal	Normal	13.5	heterogeneous	No	unknown	Enlarged
risk	EC116	46	22.3	110/70	Unknown	N/A	Yes	Yes	No	No	No	1	15	30	7	1	2017.4.24	No	N/A	Yes	19	3	3	0	19	20	21	No	No	No	No	Yes	Normal	Normal	22	unknown	No	unknown	Enlarged
risk	EC117	47	22.2	110/70	endometrial thickening	N/A	Yes	Yes	No	No	No	1	16	30	7	1	2017.5.15	No	N/A	Yes	30	3	1	2	30	31	44	No	No	No	No	No	Normal	Normal	18	heterogeneous	No	unknown	Normal
risk	EC118	42	Unknown	120/85	Unknown	N/A	Yes	Yes	No	No	No	1	12	15-30	7-12	1	2017.4.18	No	N/A	Yes	20	2	2	0	21	21	23	No	No	No	No	Yes	Erosions	Normal	15	heterogeneous	No	No	Normal
risk	EC120	51	21.2	120/75	endometrial polyp	N/A	Yes	Yes	No	No	No	/	16	30	6	1	2017.1.5	No	N/A	Yes	23	5	5	0	24	25	35	No	No	No	esophagus cancer (father)	No	Normal	Abnormal	14	heterogeneous	No	unknown	Normal
risk	EC121	55	24.9	70/60	secretory phase	N/A	Yes	Yes	No	No	No	1	12	30	13	0	2017.5.7	No	N/A	Yes	19	3	3	0	19	20	27	No	No	No	No	Yes	Abnormal	Normal	15	heterogeneous	No	Rich	Normal
risk	EC122	50	30.8	110/70	benign cystic glandular hyperplasia	N/A	Yes	Yes	No	No	No	1	/	/	5	0	2017.5.16	No	N/A	Yes	21	6	6	0	22	23	27	No	No	No	No	Yes	Abnormal	Normal	20	heterogeneous	No	unknown	Normal
risk	EC124	64	25.5	120/79	no pathological abnormality	N/A	No	Yes	Yes	No	No	1	14	30	7	0	Unknown	Yes	58	Yes	Unknown	1	1	0	28	29	28	No	No	No	No	Yes	Enlarged	Normal	16.5	heterogeneous	No	No	Postmenopausal uterine, reduced
risk	EC125	46	25.7	120/80	adenomyosis	N/A	Yes	Yes	Yes	No	No	1	14	23-72	3-7	1	2017.5.21	No	N/A	Yes	20	5	1	4	19	22	38	No	No	No	No	Yes	Normal	Normal	21	heterogeneous	No	unknown	Normal
risk	EC126	36	19.8	110/70	Unknown	N/A	Yes	Yes	Yes	No	No	1	14	30	3-7	1	2017.2.24	No	N/A	Yes	23	4	2	2	23	24	32	No	No	No	lymphoma (father)	No	Normal	Normal	26	heterogeneous	No	unknown	Normal
risk	EC127	41	25.7	110/70	benign cystic glandular hyperplasia	N/A	Yes	Yes	Yes	No	No	1	14	30	7	0	2017.6.2	No	N/A	Yes	33	3	1	2	34	35	38	No	No	No	No	Yes	Normal	Normal	16.4	heterogeneous	No	unknown	Normal
risk	EC128	45	19.1	100/75	secretory phase	N/A	Yes	Yes	Yes	No	No	1	14	30	7	1	2017.5.11	No	N/A	Yes	26	3	1	2	26	26	30	No	No	No	No	Yes	Normal	Abnormal	21	heterogeneous	No	unknown	Enlarged
risk	EC129	46	24.2	100/75	benign cystic glandular hyperplasia	N/A	Yes	Yes	Yes	No	No	1	16	30	5-7	11	2017.3.25	No	N/A	Yes	30	4	2	2	23	31	38	No	No	No	No	Yes	Normal	Normal	17.4	heterogeneous	No	unknown	Normal
risk	EC130	50	32	161/75	chronic endometritis	N/A	Yes	Yes	Yes	No	No	1	15	30	3	1	2017.5.24	No	N/A	Yes	24	5	2	3	28	29	34	No	No	No	No	No	Normal	Normal	16	heterogeneous	No	unknown	Normal
risk	EC131	45	19.1	110/70	chronic endometritis	N/A	Yes	Yes	Yes	No	No	1	15	24	3	2	2017.12	No	N/A	Yes	29	4	2	2	28	29	38	No	No	No	cancer（father)	Yes	Enlarged	Normal	13	heterogeneous	No	unknown	Normal
risk	EC132	39	12.8	120/85	chronic endometritis	N/A	Yes	Yes	Yes	No	No	1	15	30	30	0	2017.6.8	No	N/A	Yes	24	7	2	5	24	24	39	No	No	No	No	Yes	Enlarged	Normal	15	heterogeneous	No	unknown	Normal
risk	EC133	54	21.6	95/60	secretory phase	N/A	Yes	Yes	Yes	No	No	1	14	25-30	7	1	2017.5.18	No	N/A	Yes	22	3	2	1	22	23	26	No	No	No	No	Yes	Erosions	Abnormal	14	heterogeneous	No	unknown	Normal
risk	EC134	46	21	100/85	endometrial hyperplasia	N/A	Yes	Yes	Yes	No	No	1	14	40-60	5	1	2017.6.10	No	N/A	Yes	26	1	1	0	36	36	36	No	No	No	No	Yes	Enlarged	Abnormal	15	unknown	No	unknown	Normal
risk	EC135	45	20.3	90/60	benign cystic glandular hyperplasia	N/A	Yes	Yes	Yes	No	No	1	15	28	3-15	1	2017.3	No	N/A	Yes	24	8	2	6	24	24	39	No	No	No	rectal cancers (mother)	Yes	Enlarged	Abnormal	15	unknown	No	unknown	Enlarged
risk	EC136	43	24	80/60	Unknown	N/A	Yes	Yes	Yes	No	No	1	15	28	4	1	2017.6.10	No	N/A	Yes	21	4	3	1	24	24	31	No	No	No	No	Yes	Normal	Normal	20	homogenous	No	No	Normal
risk	EC137	39	28	90/60	chronic endometritis	N/A	Yes	Yes	Yes	No	No	1	15	30	3	1	2017.6.4	No	N/A	Yes	22	5	2	3	20	23	36	No	No	No	No	Yes	Normal	Abnormal	15	heterogeneous	No	unknown	Normal
risk	EC138	39	17.4	100/75	endometrial hyperplasia	N/A	Yes	Yes	Yes	No	No	1	12	28	5-6	1	2017.6.1	No	N/A	Yes	21	4	2	2	24	24	27	No	No	No	No	Yes	Normal	Normal	14	heterogeneous	No	unknown	Normal
risk	EC139	52	29.3	120/80	proliferative phase	N/A	Yes	Yes	Yes	No	No	1	16	30	10	0	2017.6.11	No	N/A	Yes	20	2	2	0	21	21	23	No	No	No	No	Yes	Normal	Normal	20	heterogeneous	No	unknown	Enlarged
risk	EC141	40	17.4	120/80	proliferative phase	N/A	Yes	Yes	Yes	No	No	1	15	20-30	20	0	2017.6.1	No	N/A	Yes	28	2	2	0	28	29	38	No	No	No	No	Yes	Erosions	Normal	13	heterogeneous	No	unknown	Normal
risk	EC143	47	22.3	90/50	chronic endometritis	N/A	Yes	Yes	Yes	No	No	1	14	30	7	1	2017.5.30	No	N/A	Yes	25	3	1	2	33	33	36	No	No	No	breast cancer (sister)	Yes	Normal	Abnormal	16	homogenous	Yes	No	Normal
risk	EC144	49	22.8	110/80	endometrial hyperplasia	N/A	Yes	Yes	Yes	No	No	/	14	10-20	12	0	2017.6.13	No	N/A	Yes	24	4	2	2	24	24	30	No	No	No	No	No	Normal	Normal	15	heterogeneous	Yes	Yes	Enlarged
risk	EC145	42	29.7	110/80	secretory phase	N/A	Yes	Yes	Yes	No	No	1	13	30	7	1	2017.6.23	No	N/A	Yes	25	3	3	0	Unknown	26	37	No	No	No	No	Yes	Abnormal	Normal	10	homogenous	No	spot-like	Normal
risk	EC146	43	25.9	120/80	secretory phase	N/A	Yes	Yes	Yes	No	No	/	12	25	7	1	2017.6.8	No	N/A	Yes	24	2	1	1	24	24	42	No	No	No	No	No	Normal	Normal	13	heterogeneous	Yes	strip-like	Enlarged
risk	EC147	48	27.1	110/70	Unknown	N/A	Yes	Yes	Yes	No	No	1	15	25	4-7	1	2017.5.16	No	N/A	Yes	22	4	2	2	22	23	38	No	No	No	No	Yes	Normal	Normal	18	unknown	No	unknown	Normal
risk	EC148	39	22.2	110/70	proliferative phase	N/A	Yes	Yes	Yes	No	No	1	14	25	7	1	2017.6.17	No	N/A	Yes	20	2	1	1	20	21	30	No	No	No	No	Yes	Normal	Normal	14	heterogeneous	No	unknown	Enlarged
risk	EC149	52	25	110/70	Unknown	N/A	Yes	Yes	Yes	No	No	1	19	30	7	1	2017.6.22	No	N/A	Yes	22	6	4	2	24	24	30	No	No	No	No	Yes	Enlarged	Normal	19	heterogeneous	No	unknown	Enlarged
risk	EC150	49	19.9	110/70	proliferative phase	N/A	Yes	Yes	Yes	No	No	1	16	30	5-6	1	2017.6.18	No	N/A	Yes	24	3	1	2	23	31	30	No	No	No	cervical cancer (mother)	Yes	Normal	Normal	16	heterogeneous	No	unknown	Enlarged
risk	EC151	35	20.3	140/70	proliferative phase	N/A	Yes	Yes	Yes	No	No	1	15	25	5-7	0	2017.6.22	No	N/A	Yes	24	2	1	1	22	Unknown	31	No	No	No	No	Yes	Normal	Normal	16	heterogeneous	No	unknown	Enlarged
risk	EC153	53	21.4	100/70	secretory phase	N/A	Yes	Yes	Yes	No	No	1	16	25-37	7	1	2017.6.1	No	N/A	Yes	Unknown	3	3	0	21	21	30	No	No	No	No	No	Erosions	Normal	13	heterogeneous	No	unknown	Normal
risk	EC154	48	31.6	130/80	Unknown	N/A	Yes	Yes	Yes	No	No	/	13	31	7-15	0	2017.6.30	No	N/A	Yes	23	4	0	4	23	N/A	40	No	No	No	diabetes (mother)	No	Abnormal	Normal	15	heterogeneous	No	strip-like	Enlarged
risk	EC155	27	20.7	110/80	secretory phase	N/A	Yes	Yes	Yes	No	No	1	14	28	5	1	2017.6.15	No	N/A	Yes	25	Unknown	Unknown	Unknown	Unknown	Unknown	Unknown	No	No	No	No	Yes	Normal	Normal	18	heterogeneous	No	No	Enlarged
risk	EC156	32	23.3	120/76	HPV-infected	N/A	Yes	Yes	Yes	No	No	/	13	28	7-30	1	2017.6.5	No	N/A	Yes	23	1	0	1	28	N/A	28	No	No	No	No	Yes	Normal	Abnormal	13.5	heterogeneous	No	strip-like	Normal
risk	EC157	46	27.9	120/85	chronic endometritis	N/A	Yes	Yes	Yes	No	No	1	17	30	7	1	Unknown	No	N/A	Yes	24	3	2	1	24	25	30	No	No	No	No	Yes	Normal	Abnormal	14	homogenous	No	No	Enlarged
risk	EC158	36	30.1	110/80	chronic endometritis	N/A	Yes	Yes	Yes	No	No	1	13	30	7	1	2017.5.6	No	N/A	Yes	34	2	1	1	18	34	34	No	No	No	No	Yes	Normal	Normal	15	heterogeneous	No	unknown	Normal
risk	EC159	36	23.8	100/60	chronic endometritis	N/A	Yes	Yes	Yes	No	No	1	15	25-30	3-4	1	2017.5	No	N/A	Yes	25	2	2	0	25	25	30	No	No	No	No	Yes	Erosions	Normal	16	heterogeneous	No	No	Normal
risk	EC160	44	28.5	160/98	proliferative phase	N/A	Yes	Yes	Yes	No	No	1	15	28	7-60	1	2017.4	No	N/A	Yes	24	4	2	2	24	24	36	Yes	Yes	No	hypertension (father)	Yes	Normal	Abnormal	14	heterogeneous	Yes	strip-like	Enlarged
risk	EC161	53	28.3	123/72	benign cystic glandular hyperplasia	N/A	Yes	Yes	Yes	No	No	1	12	40	5-10	0	2017.6.28	No	N/A	Yes	19	4	4	0	19	20	Unknown	No	No	No	bone cancer (father) and emphysema (mother) and breast cancer (sister)	Yes	Abnormal	Abnormal	18	heterogeneous	No	strip-like	Enlarged
risk	EC162	52	21.9	100/70	benign cystic glandular hyperplasia	N/A	Yes	Yes	Yes	No	No	1	13	25-30	6	1	2017.6.25	No	N/A	Yes	25	4	1	3	25	26	37	No	No	No	No	Yes	Normal	Normal	15	heterogeneous	No	No	Normal
risk	EC163	45	19.1	90/60	secretory phase	N/A	Yes	Yes	Yes	No	No	1	14	30	3-4	1	2017.6	No	N/A	Yes	22	4	4	0	22	23	29	No	No	No	No	Yes	Normal	Normal	16	heterogeneous	No	No	Normal
risk	EC164	31	19.5	110/75	Unknown	N/A	Yes	Yes	Yes	No	No	1	14	28	5-6	1	2017.7.4	No	N/A	Yes	25	2	1	1	26	27	27	No	No	No	No	Yes	Normal	Normal	3	heterogeneous	No	No	Normal
risk	EC165	51	22.9	110/80	endometrial hyperplasia	N/A	Yes	No	Yes	No	No	1	16	30	7	1	2017.7.18	No	N/A	Yes	20	5	4	1	23	23	29	No	No	No	No	Yes	Normal	Abnormal	20	heterogeneous	No	strip-like	Normal
risk	EC166	28	19.7	110/80	Unknown	N/A	Yes	Yes	Yes	No	No	/	13	30	7-16	1	2017.6.9	No	N/A	Yes	24	1	0	1	19	N/A	19	No	No	No	No	Yes	Normal	Abnormal	17	heterogeneous	No	No	Normal
risk	EC168	41	26.2	130/80	endometrial hyperplasia	N/A	No	Yes	Yes	No	No	3	15	28	3	0	2017.7.7	No	N/A	Yes	Unknown	3	2	1	26	27	30	No	No	No	No	No	Normal	Normal	21	heterogeneous	No	No	Normal
risk	EC169	45	27.5	130/90	benign cystic glandular hyperplasia	N/A	Yes	Yes	Yes	No	No	1	14	30	5-7	1	2017.6.29	No	N/A	Yes	24	3	1	2	26	27	31	No	No	No	diabetes (grandfather and grandmother)	Yes	Abnormal	Normal	unknown	heterogeneous	No	strip-like	Normal
risk	EC170	48	22.6	110/70	proliferative phase	N/A	Yes	Yes	Yes	No	No	1	14	25	7	1	2016.8	Yes	47	Yes	27	3	1	2	27	28	33	No	No	No	No	No	Normal	Normal	6	unknown	No	No	Reduced
risk	EC171	48	25.5	130/80	Unknown	N/A	Yes	Yes	Yes	No	No	1	16	21	5-8	1	2017.5	No	N/A	Yes	22	2	2	0	22	24	24	No	No	No	No	Yes	Normal	Abnormal	13	heterogeneous	No	strip-like	Enlarged
risk	EC173	40	20.5	110/70	Unknown	N/A	Yes	Yes	Yes	No	No	1	/	23-30	7	0	2017.6.9	No	N/A	Yes	20	2	2	0	20	20	22	No	No	No	No	Yes	Normal	Normal	16	unknown	No	No	Normal
risk	EC174	48	25	100/70	Unknown	N/A	Yes	Yes	Yes	No	No	1	13	28	7	0	2017.6.4	No	N/A	Yes	23	2	1	1	24	27	27	No	No	No	No	Yes	Normal	Normal	20	heterogeneous	No	No	Enlarged
risk	EC175	43	25.7	100/70	Unknown	N/A	Yes	Yes	Yes	No	No	/	14	28	5-7	0	2017.7.29	No	N/A	Yes	28	5	3	2	22	30	33	No	No	No	No	Yes	Erosions	Normal	17.3	heterogeneous	No	No	Enlarged
risk	EC176	49	23.8	110/80	chronic endometritis	N/A	Yes	Yes	Yes	No	No	1	13	15-30	15	1	2017.7.16	No	N/A	Yes	17	4	4	0	17	17	21	No	No	No	No	Yes	Normal	Abnormal	18	heterogeneous	No	No	Normal
risk	EC177	41	17.8	Unknown	benign cystic glandular hyperplasia	N/A	Yes	Yes	Yes	No	No	1	16	28-90	4	1	2017.5.10	No	N/A	Yes	20	4	2	2	19	20	27	No	No	No	No	Yes	Normal	Abnormal	22	unknown	Yes	spot-like	Normal
risk	EC178	39	22.6	110/80	proliferative phase	N/A	Yes	Yes	Yes	No	No	/	12	28	5	1	2017.7.22	No	N/A	Yes	26	4	2	2	26	27	34	No	No	No	No	No	Normal	Normal	17	homogenous	No	No	Normal
risk	EC179	44	22.6	90/57	chronic endometritis	N/A	Yes	Yes	Yes	No	No	1	12	25	6-21	0	2017.7.15	No	N/A	Yes	24	3	1	2	24	31	33	No	No	No	No	No	Normal	Abnormal	13	heterogeneous	No	No	Normal
risk	EC182	43	20.3	110/80	Unknown	N/A	Yes	Yes	Yes	No	No	/	16	30	3-4	1	2017.7.27	No	N/A	Yes	20	2	2	0	23	23	25	No	No	breast cancer	No	No	Normal	Normal	22	unknown	No	No	Normal
risk	EC183	57	18.7	110/80	proliferative phase	N/A	Yes	Yes	Yes	No	No	1	15	30	4	0	Unknown	Yes	52	Yes	24	7	7	0	24	25	36	No	No	No	No	Yes	Normal	Normal	13	homogenous	No	No	postmenopausal uterine
risk	EC185	45	23.2	110/80	secretory phase	N/A	Yes	Yes	Yes	No	No	/	14	30	5-6	1	2017.7.20	No	N/A	Yes	22	2	2	0	25	25	27	No	No	No	No	No	Abnormal	Normal	17	homogenous	No	No	Normal
risk	EC186	41	30.8	110/80	Unknown	N/A	Yes	Yes	Yes	No	No	/	10	30	10-15	1	2017.7.10	No	N/A	Yes	29	2	1	1	30	31	35	No	Yes	No	diabetes (mother)	Yes	Normal	Abnormal	21	heterogeneous	Yes	strip-like	Enlarged
risk	EC187	48	22.2	140/90	Unknown	N/A	Yes	Yes	Yes	No	No	/	14	30	4-7	0	2017.7.29	No	N/A	Yes	21	2	2	0	23	23	30	No	No	No	No	Yes	Abnormal	Normal	6	heterogeneous	No	No	Normal
risk	EC188	52	19.5	100/70	proliferative phase	N/A	Yes	Yes	Yes	No	No	/	18	30	8-10	0	2017.8.5	No	N/A	Yes	29	3	2	0	29	30	35	No	No	No	No	Yes	Abnormal	Abnormal	17	heterogeneous	No	strip-like	Normal
risk	EC189	41	25.3	110/70	proliferative phase	N/A	Yes	Yes	Yes	No	No	/	12	30	5	1	2017.8.5	No	N/A	Yes	27	2	1	1	27	28	Unknown	No	No	No	No	No	Normal	Normal	13	heterogeneous	No	strip-like	Normal
risk	EC190	47	20.4	90/60	secretory phase	N/A	Yes	Yes	Yes	No	No	1	14	30	12	1	2017.7.17	No	N/A	Yes	20	4	4	0	20	20	27	No	No	No	No	Yes	Normal	Normal	25	heterogeneous	No	strip-like	Normal
risk	EC191	41	24	100/70	benign cystic glandular hyperplasia	N/A	Yes	Yes	Yes	No	No	1	12	30	7	1	2017.6.28	No	N/A	Yes	Unknown	2	0	2	24	N/A	27	No	No	No	No	Yes	Normal	Normal	13	heterogeneous	No	No	Enlarged
risk	EC193	48	20.1	110/80	chronic endometritis	N/A	Yes	Yes	Yes	No	No	/	16	28	6	0	2017.7.27	No	N/A	Yes	24	3	1	2	24	25	26	No	No	No	No	No	Enlarged	Normal	16	heterogeneous	Yes	strip-like	Normal
risk	EC196	31	30.1	110/80	proliferative phase	N/A	Yes	Yes	Yes	No	No	1	12	28	3-7	1	2017.6.12	No	N/A	Yes	22	5	2	3	20	21	30	No	No	No	No	No	Enlarged and Erosions	Normal	15	homogenous	No	No	Normal
risk	EC198	37	19.9	110/80	secretory phase	N/A	Yes	Yes	Yes	No	No	1	14	28	5-10	1	2017.7.28	No	N/A	Yes	25	3	2	1	29	29	30	No	No	No	No	Yes	Normal	Normal	13	heterogeneous	Yes	No	Normal
risk	EC199	28	24.8	90/60	proliferative phase	N/A	Yes	Yes	Yes	No	No	1	14	30	7	1	2017.7.31	No	N/A	Yes	25	1	0	1	Unknown	N/A	Unknown	No	No	No	No	Yes	Normal	Abnormal	16	heterogeneous	No	No	Normal
risk	EC200	45	27.9	110/70	proliferative phase	N/A	Yes	Yes	Yes	No	No	/	14	28	7	1	2017.8.3	No	N/A	Yes	24	11	7	4	24	25	36	No	No	No	No	No	Normal	Normal	17	heterogeneous	Yes	No	Enlarged
risk	EC202	50	19.9	110/80	chronic endometritis	N/A	Yes	Yes	Yes	No	No	1	13	28	5-10	0	2017.7.29	No	N/A	Yes	22	5	1	4	22	22	36	No	No	No	No	Yes	Normal	Abnormal	19	heterogeneous	Yes	spot-like	Enlarged
risk	EC203	32	21.9	110/80	chronic endometritis	N/A	Yes	Yes	Yes	No	No	1	12	28	7-60	1	2017.7.30	No	N/A	Yes	23	4	2	2	24	25	29	No	No	No	No	Yes	Normal	Normal	19	heterogeneous	No	No	Normal
risk	EC204	49	23.7	90/60	benign cystic glandular hyperplasia	N/A	Yes	Yes	Yes	No	No	1	14	30	7	1	2017.8.14	No	N/A	Yes	23	2	1	1	23	23	25	No	No	No	No	Yes	Normal	Normal	22	heterogeneous	No	No	Normal
risk	EC205	41	24	110/70	benign cystic glandular hyperplasia	N/A	Yes	Yes	Yes	No	No	1	14	30	5-7	1	2017.8.21	No	N/A	Yes	21	3	2	1	21	22	23	No	No	No	Unknown	Yes	Normal	Normal	13	heterogeneous	No	spot-like	Normal
risk	EC206	48	22.7	100/55	proliferative phase	N/A	Yes	Yes	Yes	No	No	/	13	28	7	1	2011	No	N/A	Yes	23	3	1	2	23	27	29	No	No	No	No	No	Normal	Abnormal	17	heterogeneous	No	Yes	Normal
risk	EC207	49	20.2	110/80	chronic endometritis	N/A	Yes	Yes	Yes	No	No	1	17	28	7-30	1	2017.7.22	No	N/A	Yes	19	6	6	0	19	20	26	No	No	No	No	Yes	Normal	Normal	unknown	unknown	No	unknown	Normal
risk	EC208	42	25.8	110/80	Unknown	N/A	Yes	Yes	Yes	No	No	1	14	28	5-7	1	2017.8.12	No	N/A	Yes	20	2	2	0	22	23	30	No	No	No	No	Yes	Enlarged	Abnormal	19	unknown	Yes	strip-like	Normal
risk	EC212	36	21.9	100/70	benign cystic glandular hyperplasia	N/A	Yes	Yes	Yes	No	No	1	14	25	5-7	1	2017.6.30	No	N/A	Yes	26	5	0	5	23	N/A	25	No	No	No	No	Yes	Normal	Normal	15	heterogeneous	No	No	Normal
risk	EC213	52	28.6	100/70	secretory phase	N/A	Yes	Yes	Yes	No	No	1	14	30-90	4-7	1	2017.8.29	No	N/A	Yes	21	6	2	4	21	21	28	No	No	No	No	Yes	Normal	Normal	14	heterogeneous	No	spot-like	Normal
risk	EC214	51	22.5	100/70	benign cystic glandular hyperplasia	N/A	Yes	Yes	Yes	No	No	1	14	30	7	1	2017	No	N/A	Yes	21	6	4	2	27	27	31	No	No	No	No	No	Normal	Normal	21	heterogeneous	No	No	Normal
risk	EC215	50	28.7	115/82	proliferative phase	N/A	Yes	Yes	Yes	No	No	1	13	28	7-8	0	2017.8.7	No	N/A	Yes	36	3	1	2	30	43	43	No	No	No	No	Yes	Normal	Abnormal	13	heterogeneous	No	No	Normal
risk	EC216	43	30	149/89	proliferative phase	N/A	Yes	Yes	Yes	No	No	1	13	28	3-10	0	2017.8.10	No	N/A	Yes	22	5	5	0	22	22	34	No	No	No	No	Yes	Normal	Normal	13	heterogeneous	No	No	Normal
risk	EC217	53	20.8	100/70	Unknown	N/A	Yes	Yes	Yes	No	No	1	15	30	5-7	1	2017.7.15	No	N/A	Yes	27	5	2	3	26	27	35	No	No	No	No	Yes	Normal	Normal	12	heterogeneous	No	No	Normal
risk	EC218	24	31.2	130/80	Unknown	N/A	Yes	Yes	Yes	No	No	3	12	28-30	4-5	1	2017.5.18	No	N/A	Yes	22	0	0	0	N/A	N/A	N/A	No	No	No	No	Yes	Normal	Normal	16	heterogeneous	No	No	Normal
risk	EC219	49	25.5	110/80	chronic endometritis	N/A	Yes	Yes	Yes	No	No	1	16	28	7-24	1	2017.8.15	No	N/A	Yes	23	3	1	2	24	25	Unknown	No	No	No	No	Yes	Erosions	Abnormal	12	heterogeneous	No	Yes	Normal
risk	EC220	47	27.7	140/85	Unknown	N/A	Yes	Yes	Yes	No	No	1	14	28	5-30	1	2017.8.10	No	N/A	Yes	24	6	3	3	23	24	Unknown	No	Unknown	No	No	Yes	Normal	Abnormal	12	homogenous	No	No	Normal
risk	EC221	31	22.2	110/80	chronic endometritis	N/A	Yes	Yes	Yes	No	No	1	18	28	7-10	1	2017.9.1	No	N/A	Yes	26	0	0	0	N/A	N/A	N/A	No	Unknown	No	No	Yes	Normal	Abnormal	26	homogenous	No	spot-like	Normal
risk	EC222	31	26.8	125/77	Unknown	N/A	Yes	Yes	Yes	No	No	/	/	28-50	5-7	1	2017.8.1	No	N/A	Yes	24	1	0	1	25	N/A	25	No	Unknown	No	No	No	Normal	Abnormal	27	heterogeneous	No	strip-like	Normal
risk	EC223	50	24.4	110/80	benign cystic glandular hyperplasia	N/A	Yes	Yes	Yes	No	No	1	14	28	4-10	1	2017.9.4	No	N/A	Yes	18	4	3	1	19	20	27	No	Unknown	No	No	Yes	Erosions	Abnormal	20	heterogeneous	No	strip-like	Enlarged
risk	EC225	43	22.9	110/80	benign cystic glandular hyperplasia	N/A	Yes	Yes	Yes	No	No	1	14	28	5-28	1	2017.8.22	No	N/A	Yes	20	3	2	1	20	21	26	No	Unknown	No	No	Yes	Normal	Abnormal	14	heterogeneous	No	No	Normal
risk	EC227	30	18.2	110/80	endometrial polyp	N/A	Yes	Yes	Yes	No	No	1	10	28	6-7	1	2017.8.20	No	N/A	Yes	26	1	1	0	27	27	27	No	Unknown	No	No	Yes	Normal	Abnormal	20	heterogeneous	No	strip-like	Normal
risk	EC229	49	27.4	110/70	proliferative phase	N/A	Yes	Yes	Yes	No	No	1	14	15	8	0	2017.7.2	No	N/A	Yes	30	4	2	2	32	32	38	No	Unknown	No	esophagus cancer (father)	No	Normal	Normal	22	heterogeneous	No	No	Enlarged
risk	EC230	36	19.5	100/70	chronic endometritis	N/A	Yes	Yes	Yes	No	No	/	/	11-41	6	1	2017.9.13	No	N/A	Yes	22	2	2	0	29	29	31	No	Unknown	No	gastric cancer (father)	No	Normal	Normal	15	heterogeneous	No	No	Normal
risk	EC232	33	19.1	110/70	proliferative phase	N/A	Yes	Yes	Yes	No	No	/	14	30	7	1	2017.9.19	No	N/A	Yes	30	2	2	0	30	30	33	No	No	No	No	Yes	Normal	Normal	14	heterogeneous	Yes	No	Normal
risk	EC233	48	26.3	110/80	benign cystic glandular hyperplasia	N/A	Yes	Yes	Yes	No	No	1	13	30	7-10	1	2017.9.5	No	N/A	Yes	23	2	1	1	25	27	26	No	No	No	No	Yes	Normal	Normal	21	heterogeneous	No	No	Normal
risk	EC234	40	34.2	110/80	secretory phase	N/A	Yes	Yes	Yes	No	No	/	11	30	6	1	2017.9.12	No	N/A	Yes	28	3	1	2	28	29	36	No	No	No	No	No	Normal	Normal	18	heterogeneous	No	No	Normal
risk	EC235	39	19.5	110/80	benign cystic glandular hyperplasia	N/A	Yes	Yes	Yes	No	No	1	13	30	6-10	1	2017.9.17	No	N/A	Yes	26	1	1	0	28	28	28	No	No	No	No	Yes	Normal	Abnormal	21	heterogeneous	No	No	Normal
risk	EC236	43	28.8	110/80	HPV-infected	N/A	Yes	Yes	Yes	No	No	/	13	30	4-6	1	Unknown	Yes	37	Yes	21	1	0	1	20	N/A	20	No	No	No	No	No	Normal	Normal	13	homogenous	No	No	Reduced
risk	EC237	50	Unknown	100/70	chronic endometritis	N/A	Yes	Yes	Yes	No	No	1	/	24	5	1	2017.9.13	No	N/A	Yes	Unknown	5	1	2	Unknown	Unknown	Unknown	No	No	No	No	Yes	Normal	Normal	11	unknown	No	No	Enlarged
risk	EC238	35	27.1	110/70	benign cystic glandular hyperplasia	N/A	Yes	Yes	Yes	No	No	1	15	30	7	1	2017.8.24	No	N/A	Yes	26	1	1	0	28	28	28	No	No	No	No	Yes	Enlarged	Normal	12	heterogeneous	No	No	Normal
risk	EC240	48	21.5	110/80	endometrial polyp	N/A	Yes	Yes	Yes	No	No	/	15	30	7	0	2017.9.1	No	N/A	Yes	21	6	1	5	21	30	41	No	No	No	No	Yes	Polyp	Normal	16	heterogeneous	No	No	Normal
risk	EC241	39	16.9	90/55	secretory phase	N/A	Yes	Yes	Yes	No	No	/	13	30	7-8	1	2017.9.27	No	N/A	Yes	36	2	1	1	24	37	36	No	No	No	No	No	Normal	Abnormal	14	heterogeneous	No	spot-like	Enlarged
risk	EC242	37	23.3	110/80	benign cystic glandular hyperplasia	N/A	Yes	Yes	No	No	No	1	14	15-60	3-30	1	2017.8.23	No	N/A	Yes	24	4	2	2	25	26	35	No	Unknown	No	No	Yes	Erosions	Normal	21	unknown	No	unknown	Normal
risk	EC243	41	24.7	138/101	secretory phase	N/A	Yes	Yes	Yes	No	No	1	17	21	7	0	2017.9.13	No	N/A	Yes	28	3	2	1	28	31	36	No	Unknown	No	cervical cancer (mother) and lymphoma (father)	Yes	Enlarged	Normal	18	heterogeneous	No	No	Enlarged
risk	EC244	41	25	100/70	chronic endometritis	N/A	Yes	Yes	Yes	No	No	1	15	27	7	0	2017.9.11	No	N/A	Yes	32	1	1	0	32	32	32	No	Unknown	No	No	Yes	Normal	Normal	15	heterogeneous	No	No	Normal
risk	EC246	48	23.4	110/80	secretory phase	N/A	Yes	Yes	Yes	No	No	1	14	30	7	1	2017.9.21	No	N/A	Yes	30	1	1	0	39	40	39	No	Yes	breast cancer	No	Yes	Normal	Abnormal	13	heterogeneous	No	strip-like	Enlarged
risk	EC247	41	19.5	110/80	benign cystic glandular hyperplasia	N/A	Yes	Yes	Yes	No	No	1	13	28-45	6	1	2017.9.30	No	N/A	Yes	30	1	2	0	33	34	33	No	Unknown	No	No	Yes	Normal	Abnormal	16	heterogeneous	No	No	Normal
risk	EC248	30	24.8	110/80	proliferative phase	N/A	Yes	Yes	Yes	No	No	/	Unknown	Unknown	Unknown	Unknown	2017.9.26	No	N/A	Yes	Unknown	2	1	1	Unknown	Unknown	Unknown	No	Unknown	No	No	Yes	Normal	Normal	17.5	heterogeneous	No	Rich	Normal
risk	EC249	44	25.4	110/80	endometrial hyperplasia	N/A	Yes	Yes	Yes	No	No	/	14	30	6-7	1	2017.10.3	No	N/A	Yes	24	1	1	0	24	25	24	No	Unknown	No	No	No	Normal	Normal	15	heterogeneous	No	No	Enlarged
risk	EC250	50	22.7	110/80	secretory phase	N/A	Yes	Yes	Yes	No	No	1	17	30	5	2	2017.9.1	No	N/A	Yes	28	4	3	1	28	28	31	No	Unknown	No	No	No	Erosions	Normal	14	homogenous	No	No	Normal
risk	EC251	48	21.2	Unknown	Unknown	N/A	Yes	Yes	Yes	No	No	3	14	26	7	1	2017.9.28	No	N/A	Yes	23	7	6	1	23	25	32	No	Unknown	No	No	No	Normal	Abnormal	14	heterogeneous	No	No	Normal
risk	EC252	48	22.1	100/70	benign cystic glandular hyperplasia	N/A	Yes	Yes	Yes	No	No	1	16	30	7	1	2017.9.16	Yes	Unknown	Yes	23	2	2	0	24	24	26	No	Unknown	No	No	Yes	Normal	Normal	17	heterogeneous	No	No	Normal
risk	EC253	46	20.7	100/70	Unknown	N/A	Yes	Yes	Yes	No	No	/	15	27	7	1	2017.7.15	Yes	Unknown	Yes	19	2	2	0	19	19	21	No	Unknown	breast cancer	No	No	Normal	Normal	16	heterogeneous	No	No	Normal
risk	EC254	46	Unknown	110/80	benign cystic glandular hyperplasia	N/A	Yes	Yes	Yes	No	No	/	14	30	7	0	2017.5.1	No	N/A	Yes	22	3	1	2	24	25	34	No	Unknown	No	No	Yes	Normal	Abnormal	17	heterogeneous	No	strip-like	Normal
risk	EC256	31	20.2	140/80	proliferative phase	N/A	Yes	Yes	Yes	No	No	1	12	28	6	1	2017.9.20	No	N/A	No	Unknown	Unknown	Unknown	Unknown	Unknown	Unknown	Unknown	No	Unknown	No	breast cancer (mother)	Yes	Cervical wall cyst	Normal	14	heterogeneous	No	No	Normal
risk	EC259	50	24.7	100/75	benign cystic glandular hyperplasia	N/A	Yes	Yes	No	No	No	1	16	30	3	0	2017.9.29	No	N/A	Yes	21	3	0	0	Unknown	N/A	Unknown	No	Unknown	No	No	Yes	Normal	Normal	13	heterogeneous	No	No	Normal
risk	EC260	38	22.3	Unknown	benign cystic glandular hyperplasia	N/A	Yes	Yes	Yes	No	No	1	13	30	7	1	2017.9.20	No	N/A	Yes	32	0	0	0	N/A	N/A	N/A	No	Unknown	No	No	Yes	Erosions	Normal	13	heterogeneous	No	No	Normal
risk	EC261	43	22.7	Unknown	benign cystic glandular hyperplasia	N/A	Yes	Yes	Yes	No	No	/	15	30	7	1	Unknown	No	N/A	Yes	24	4	2	2	24	34	34	No	Unknown	No	gastric cancer (mother)	No	Normal	Normal	15	heterogeneous	No	No	Normal
risk	EC262	46	33.3	130/80	benign cystic glandular hyperplasia	N/A	Yes	Yes	Yes	No	No	1	15	30	7	1	2017.8.18	No	N/A	Yes	20	3	3	0	20	21	22	Yes	Unknown	No	No	Yes	Enlarged	Normal	19	heterogeneous	No	No	Normal
risk	EC263	44	29.3	Unknown	benign cystic glandular hyperplasia	N/A	Yes	Yes	Yes	No	No	3	15	30	3	1	2017.9.27	No	N/A	Yes	23	2	2	0	24	30	29	No	Unknown	No	No	No	Normal	Abnormal	17	heterogeneous	No	No	Enlarged
risk	EC264	47	24.7	147/95	benign cystic glandular hyperplasia	N/A	Yes	Yes	Yes	No	No	1	15	30	3-5	1	2017.8.17	No	N/A	Yes	20	5	2	3	20	21	40	No	Unknown	No	No	Yes	Enlarged	Normal	16	heterogeneous	No	No	Normal
risk	EC266	40	Unknown	110/80	secretory phase	N/A	Yes	Yes	Yes	No	No	1	15	30	7-12	1	2017.10.4	No	N/A	Yes	26	3	2	1	27	28	39	No	Unknown	No	No	Yes	Normal	Normal	20	heterogeneous	No	strip-like	Normal
risk	EC267	24	31.25	170/80	atypical endometrial hyperplasia	N/A	Yes	Yes	Yes	No	No	/	/	30	7	1	2017.10.19	No	N/A	No	Unknown	1	0	1	Unknown	N/A	Unknown	No	Yes	No	No	Yes	Normal	Normal	25	heterogeneous	No	No	Normal
risk	EC268	42	19	110/70	secretory phase	N/A	Yes	Yes	Yes	No	No	1	12	30-35	3--10	1	2017.8.4	No	N/A	Yes	26	2	1	1	28	28	29	No	Yes	No	No	Yes	Enlarged	Normal	unknown	heterogeneous	No	No	Enlarged
risk	EC269	48	22.6	118/74	fragment of glandular	N/A	Yes	Yes	Yes	No	No	/	16	25	4-8	1	2017	Yes	48	Yes	20	6	3	0	22	22	30	No	Yes	No	No	No	Normal	Normal	13	unknown	No	No	Normal
risk	EC270	43	25.4	117/79	benign cystic glandular hyperplasia	N/A	Yes	Yes	Yes	No	No	1	/	30	3-4	1	2017.8.1	No	N/A	Yes	20	3	2	0	19	20	Unknown	No	No	No	No	Yes	Enlarged	Abnormal	22	heterogeneous	No	No	Normal
risk	EC272	51	23.8	120/80	proliferative phase	N/A	Yes	Yes	Yes	No	No	/	18	30	7	1	2016.9.1	No	N/A	Yes	29	1	1	0	29	30	29	No	No	No	No	No	Normal	Abnormal	14	heterogeneous	No	No	Normal
risk	EC273	44	21.8	110/80	Unknown	N/A	Yes	Yes	Yes	No	No	1	14	30	8	1	2017.9.3	No	N/A	Yes	23	1	1	0	34	35	34	No	No	No	No	Yes	Normal	Abnormal	14	heterogeneous	No	No	Normal
risk	EC274	58	26	140/80	endometrial hyperplasia	N/A	Yes	Yes	Yes	No	No	/	13	45	5-6	2	Unknown	Yes	50	Yes	25	2	1	1	25	27	27	Yes	No	No	No	No	Normal	Abnormal	13	heterogeneous	No	strip-like	Enlarged
risk	EC275	49	20.4	107/70	secretory phase	N/A	Yes	Yes	Yes	No	No	1	14	30	7	1	2017.10.5	No	N/A	Yes	27	2	1	1	29	30	33	No	No	No	No	Yes	Normal	Normal	17	heterogeneous	No	spot-like	Normal
risk	EC276	44	27.7	130/80	Unknown	N/A	Yes	Yes	Yes	No	No	1	14	28	5-20	1	2017.10.25	No	N/A	Yes	20	4	4	0	22	23	27	Yes	No	No	laryngeal carcinoma (father) and struma ovarii (mother)	Yes	Normal	Abnormal	25	heterogeneous	No	No	Normal
risk	EC277	47	30.6	120/80	proliferative phase	N/A	Yes	Yes	Yes	No	No	1	17	30	7-40	2	2017.9.24	No	N/A	Yes	23	3	3	0	24	25	30	No	No	No	No	No	Normal	Abnormal	20	heterogeneous	No	Yes	Normal
risk	EC278	33	27.1	130/80	benign cystic glandular hyperplasia	N/A	Yes	Yes	Yes	No	No	1	13	30	4-20	1	2017.10.8	No	N/A	Yes	23	4	2	2	23	24	33	No	No	No	No	Yes	Normal	Abnormal	17	homogenous	No	No	Normal
risk	EC279	42	31.6	154/100	benign cystic glandular hyperplasia	N/A	Yes	Yes	Yes	No	No	1	13	30	5-10	0	2017.10.4	No	N/A	Yes	25	0	0	0	N/A	N/A	N/A	No	No	No	diabetes (father and mother)	Yes	Normal	Abnormal	16	heterogeneous	No	No	Normal
risk	EC280	43	25	110/80	benign cystic glandular hyperplasia	N/A	Yes	Yes	Yes	No	No	1	16	30	7	1	2017.10.22	No	N/A	Yes	23	5	3	2	24	31	35	No	No	No	No	Yes	Normal	Abnormal	13	homogenous	No	No	Normal
risk	EC281	42	20.1	107/67	benign cystic glandular hyperplasia	N/A	Yes	Yes	Yes	No	No	1	16	30	3-4	1	2017.10.15	No	N/A	Yes	26	5	1	4	18	29	29	No	No	No	No	Yes	Normal	Abnormal	15	heterogeneous	No	No	Normal
risk	EC282	41	19.2	110/70	chronic endometritis	N/A	Yes	Yes	Yes	No	No	1	14	27	3-5	1	2017.7.20	No	N/A	Yes	19	5	2	3	19	23	34	No	No	No	No	Yes	Normal	Normal	20	unknown	No	No	Normal
risk	EC283	46	32.4	130/80	chronic endometritis	N/A	Yes	Yes	Yes	No	No	/	15	30	7	2	2016.12.1	No	N/A	Yes	20	8	3	5	20	21	Unknown	No	No	breast cancer	No	No	Normal	Abnormal	24	homogenous	No	No	Enlarged
risk	EC286	62	30.9	110/70	fragment of glandular	N/A	Yes	Yes	Yes	No	No	1	16	28	3-5	1	Unknown	Yes	57	Yes	24	3	1	2	23	24	24	No	No	No	No	Yes	Normal	Normal	11.5	heterogeneous	No	No	Reduced
risk	EC290	49	23.4	110/70	Unknown	N/A	Yes	Yes	Yes	No	No	1	/	25	6	0	2017.9.1	No	N/A	Yes	18	2	2	0	18	19	21	No	No	No	No	Yes	Normal	Normal	13	heterogeneous	No	spot-like	Enlarged
risk	EC292	36	26	110/80	benign cystic glandular hyperplasia	N/A	Yes	Yes	Yes	No	No	1	12	25	7	0	2017.11.25	No	N/A	Yes	23	3	2	1	23	32	32	No	No	No	No	Yes	Enlarged	Abnormal	15	heterogeneous	No	No	Normal
risk	EC294	51	19.5	120/80	proliferative phase	N/A	Yes	Yes	Yes	No	No	/	12	28	6-30	1	2017.12.5	No	N/A	Yes	22	4	1	3	21	23	25	No	No	No	No	Yes	Normal	Abnormal	16	heterogeneous	No	No	Enlarged
risk	EC295	33	29.2	120/80	secretory phase	N/A	Yes	Yes	Yes	No	No	1	15	30	7-50	0	2017.10.20	No	N/A	Yes	21	3	2	1	21	21	25	No	No	No	No	Yes	Normal	Normal	15	heterogeneous	No	No	Normal
risk	EC296	55	19.7	120/80	cystic endometrial atrophy	N/A	Yes	Yes	Yes	No	No	1	18	30	7	1	2008	Yes	48	Yes	22	2	2	0	22	26	26	No	No	No	No	Yes	Normal	Abnormal	11	heterogeneous	No	No	Normal
risk	EC297	47	19.7	120/80	chronic endometritis	N/A	Yes	Yes	Yes	No	No	/	13	30	7-120	0	2017.12.6	No	N/A	Yes	19	3	0	2	18	19	21	No	No	No	hypertension (mother)	Yes	Normal	Abnormal	16	heterogeneous	No	No	Normal
risk	EC298	47	25.7	170/110	proliferative phase	N/A	Yes	Yes	Yes	No	No	1	17	30	7-15	1	2017.11.25	No	N/A	Yes	18	4	2	2	18	19	26	Yes	No	No	No	No	Normal	Abnormal	13	heterogeneous	No	spot-like	Normal
risk	EC299	33	30.3	130/80	benign cystic glandular hyperplasia	N/A	Yes	Yes	Yes	No	No	1	15	30	5	1	2017.11.26	No	N/A	Yes	22	3	3	0	22	23	26	No	No	No	No	Yes	Normal	Abnormal	17	heterogeneous	No	No	Normal
risk	EC300	34	21.6	120/80	chronic endometritis	N/A	Yes	Yes	Yes	No	No	1	15	30	6	1	2017.11.24	No	N/A	Yes	24	2	1	1	25	25	34	No	No	No	No	Yes	Normal	Normal	24	heterogeneous	No	No	Normal
risk	EC304	75	26.7	140/70	proliferative phase	N/A	Yes	Yes	Yes	No	No	1	Unknown	Unknown	3-4	Unknown	Unknown	Yes	50	Yes	20	5	4	1	19	19	28	Yes	No	No	No	No	Enlarged	Normal	21	heterogeneous	No	No	Reduced
Note: Grade 1: well differentiated; Grade 2: moderately differentiated; Grade 3: poorly differentiated
CIN, Cervical intraepithelial neoplasia; LNM+, lymph node metastasis; LNM-, lymph nodenon-metastasis

## Sheet: Table S2
Table S2. List of target genes of the custom panel
10929 target genes of the custom panel
GPR153	ACOT7	ESPN	TNFRSF25	PLEKHG5	NOL9	TAS1R1	KLHL21	DNAJC11	CAMTA1	UTS2	ERRFI1	SLC45A1	RERE	ENO1	CA6	SLC2A5	GPR157	PIK3CD	CLSTN1
LZIC	KIF1B	PGD	CASZ1	C1orf127	MTOR	DISP3	C1orf167	MTHFR	CLCN6	MFN2	MIIP	TNFRSF1B	VPS13D	AADACL4	CFAP107	PRAMEF12	PRAMEF1	HNRNPCL1	PRAMEF2
HNRNPCL2	LRRC38	PRDM2	KAZN	FHAD1	CELA2A	DNAJC16	DDI2	PLEKHM2	SLC25A34	TMEM82	SPEN	ZBTB17	SRARP	EPHA2	ARHGEF19	SZRD1	NECAP2	CROCC	PADI1
PADI3	PADI6	RCC2	ACTL8	IGSF21	KLHDC7A	PAX7	TAS1R2	UBR4	EMC1	MRTO4	AKR7A3	OTUD3	PLA2G2E	PLA2G2A	PLA2G2F	PLA2G2C	VWA5B1	MUL1	KIF17
EIF4G3	ECE1	NBPF3	USP48	LDLRAD2	HSPG2	ZBTB40	EPHA8	C1QA	C1QC	EPHB2	KDM1A	LUZP1	HNRNPR	ZNF436	ASAP3	ELOA	MYOM3	IL22RA1	GRHL3
NIPAL3	RCAN3	SRRM1	RUNX3	RSRP1	TMEM50A	MAN1C1	AUNIP	PAQR7	EXTL1	TRIM63	ZNF593OS	CNKSR1	CATSPER4	CEP85	UBXN11	CRYBG2	ZNF683	RPS6KA1	ARID1A
PIGV	NR0B2	SLC9A1	WDTC1	SYTL1	MAP3K6	FCN3	FAM76A	PPP1R8	THEMIS2	PHACTR4	RCC1	EPB41	TMEM200B	SRSF4	MECR	PTPRU	MATN1	LAPTM5	SDC3
PUM1	NKAIN1	ZCCHC17	HCRTR1	COL16A1	ADGRB2	CCDC28B	IQCC	LCK	MARCKSL1	FAM229A	BSDC1	ZBTB8B	RBBP4	SYNC	TMEM54	RNF19B	AZIN2	ZNF362	PHC2
ZSCAN20	CSMD2	GJA4	DLGAP3	ZMYM1	SFPQ	ZMYM4	KIAA0319L	NCDN	CLSPN	AGO4	AGO1	AGO3	MAP7D1	THRAP3	SH3D21	STK40	OSCP1	MRPS15	GRIK3
ZC3H12A	DNALI1	GNL2	EPHA10	MANEAL	MTF1	INPP5B	UTP11	RRAGC	GJA9	NDUFS5	MACF1	HEYL	NT5C1A	HPCAL4	PPIE	MFSD2A	RLF	TMCO2	ZMPSTE24
COL9A2	SMAP2	ZFP69B	ZFP69	RIMS3	KCNQ4	CTPS1	SLFNL1	SCMH1	FOXO6	HIVEP3	FOXJ3	RIMKLA	CCDC30	PPIH	TMEM269	SLC2A1	EBNA1BP2	TMEM125	TIE1
MPL	ELOVL1	MED8	SZT2	PTPRF	DPH2	B4GALT2	CCDC24	SLC6A9	KLF17	RNF220	TMEM53	ARMH1	BTBD19	PTCH2	ZSWIM5	MUTYH	TOE1	MMACHC	AKR1A1
NASP	IPP	MAST2	PIK3R3	POMGNT1	LRRC41	UQCRH	DMBX1	EFCAB14	CYP4B1	CYP4A11	CYP4X1	CYP4A22	STIL	FOXD2	TRABD2B	SLC5A9	SPATA6	BEND5	AGBL4
DMRTA2	FAF1	RNF11	EPS15	OSBPL9	RAB3B	ZFYVE9	CC2D1B	ORC1	PRPF38A	TUT4	GPX7	SHISAL2A	COA7	ZYG11B	ZYG11A	ECHDC2	SCP2	PODN	SLC1A7
CPT2	LRP8	GLIS1	NDC1	HSPB11	LRRC42	TCEANC2	ACOT11	MROH7	TTC4	PARS2	TTC22	BSND	USP24	FYB2	C8A	C8B	DAB1	OMA1	TACSTD2
MYSM1	FGGY	HOOK1	CYP2J2	NFIA	PATJ	L1TD1	USP1	DOCK7	ANGPTL3	EFCAB7	PGM1	ROR1	UBE2U	CACHD1	RAVER2	JAK1	DNAJC6	LEPR	PDE4B
SGIP1	INSL5	DNAI4	MIER1	SLC35D1	C1orf141	IL23R	IL12RB2	SERBP1	GNG12	DIRAS3	WLS	RPE65	DEPDC1	LRRC7	LRRC40	ANKRD13C	CTH	PTGER3	LRRIQ3
ERICH3	TYW3	LHX8	SLC44A5	RABGGTB	MSH4	ASB17	ST6GALNAC5	PIGK	AK5	ZZZ3	USP33	MIGA1	NEXN	FUBP1	DNAJB4	GIPC2	PTGFR	IFI44L	IFI44
ADGRL4	ADGRL2	TTLL7	PRKACB	DNASE2B	SPATA1	SSX2IP	MCOLN2	MCOLN3	DNAI3	SYDE2	CCN1	COL24A1	ODF2L	CLCA1	CLCA4	SH3GLB1	HS2ST1	LMO4	PKN2
GTF2B	KYAT3	GBP3	GBP2	GBP4	GBP5	GBP6	LRRC8B	LRRC8C	LRRC8D	ZNF326	BARHL2	ZNF644	HFM1	TGFBR3	BRDT	EPHX4	BTBD8	RPAP2	EVI5
MTF2	CCDC18	FNBP1L	BCAR3	DNTTIP2	ABCA4	ARHGAP29	ABCD3	F3	SLC44A3	CNN3	TLCD4	RWDD3	PTBP2	DPYD	SNX7	PLPPR5	PLPPR4	PALMD	AGL
SLC35A3	SASS6	TRMT13	LRRC39	DBT	CDC14A	VCAM1	EXTL2	SLC30A7	S1PR1	OLFM3	COL11A1	RNPC3	NTNG1	VAV3	NBPF4	PRPF38B	FNDC7	STXBP3	AKNAD1
WDR47	CFAP276	SARS1	CELSR2	PSRC1	MYBPHL	SORT1	SYPL2	ATXN7L2	CYB561D1	AMIGO1	GPR61	GNAT2	AMPD2	CSF1	STRIP1	SLC6A17	KCNC4	RBM15	SLC16A4
KCNA10	KCNA2	KCNA3	LRIF1	CEPT1	DENND2D	CHI3L2	CHIA	OVGP1	ATP5PB	TMIGD3	INKA2	DDX20	KCND3	CTTNBP2NL	WNT2B	ST7L	MOV10	PPM1J	TAFA3
SLC16A1	LRIG2	MAGI3	PHTF1	RSBN1	AP4B1	HIPK1	SYT6	TRIM33	DENND2C	AMPD1	CSDE1	SYCP1	TSPAN2	NGF	VANGL1	CASQ2	SLC22A15	CD58	IGSF3
CD2	PTGFRN	CD101	TTF2	VTCN1	MAN1A2	WDR3	SPAG17	TBX15	HSD3B1	ZNF697	PHGDH	HMGCS2	REG4	ADAM30	NOTCH2	PDE4DIP	NBPF10	RBM8A	ITGA10
ANKRD35	PRKAB2	FMO5	CHD1L	BCL9	ACP6	GJA5	GJA8	NBPF24	NBPF20	BOLA1	SV2A	SF3B4	MTMR11	VPS45	ANP32E	CA14	CIART	MRPS21	PRPF3
TARS2	ADAMTSL4	ENSA	GOLPH3L	HORMAD1	CTSK	SETDB1	CERS2	ANXA9	BNIPL	MLLT11	PIP5K1A	ZNF687	PI4KB	POGZ	CGN	TUFT1	CELF3	MRPL9	TDRKH
LINGO4	TCHHL1	TCHH	HRNR	FLG	FLG2	KPRP	IVL	SPRR3	LELP1	PGLYRP4	S100A9	S100A12	S100A8	S100A3	CHTOP	ILF2	NPR1	INTS3	SLC27A3
GATAD2B	DENND4B	CRTC2	NUP210L	TPM3	UBAP2L	ATP8B2	IL6R	SHE	TDRD10	CHRNB2	ADAR	KCNN3	PBXIP1	PYGO2	CKS1B	ZBTB7B	DCST1	ADAM15	EFNA1
KRTCAP2	THBS3	MTX1	GBA1	ENTREP3	CLK2	PKLR	ASH1L	MSTO1	DAP3	GON4L	SYT11	RIT1	KHDC4	ARHGEF2	MEX3A	SEMA4A	SLC25A44	BGLAP	SMG5
GLMP	TSACC	IQGAP3	TTC24	NAXE	HAPLN2	BCAN	NES	METTL25B	HDGF	PRCC	NTRK1	PEAR1	LRRC71	ARHGEF11	ETV3L	ETV3	FCRL5	FCRL3	CD5L
CD1D	CD1A	CD1C	CD1E	OR10K1	OR6Y1	OR6P1	OR10X1	SPTA1	OR6K3	OR6K6	OR6N1	MNDA	PYHIN1	IFI16	AIM2	CADM3	OR10J3	OR10J1	OR10J5
APCS	FCRL6	CFAP45	TAGLN2	SLAMF9	KCNJ10	KCNJ9	IGSF8	ATP1A4	CASQ1	DCAF8	COPA	NCSTN	VANGL2	SLAMF6	CD84	SLAMF1	SLAMF7	LY9	CD244
ITLN1	ITLN2	F11R	USF1	ARHGAP30	KLHDC9	PFDN2	NIT1	USP21	PPOX	B4GALT3	ADAMTS4	NDUFS2	TOMM40L	NR1I3	PCP4L1	MPZ	HSPA6	FCGR3A	FCGR2B
FCRLA	DUSP12	ATF6	OLFML2B	DDR2	HSD17B7	RGS4	RGS5	NUF2	PBX1	LMX1A	RXRG	LRRC52	TMCO1	FAM78B	POGK	TADA1	ILDR2	MAEL	GPA33
STYXL2	POU2F1	CD247	RCSD1	ADCY10	GPR161	TIPRL	SFT2D2	TBX19	ATP1B1	BLZF1	CCDC181	SLC19A2	F5	SELP	SCYL3	KIFAP3	NTMT2	GORAB	PRRX1
MROH9	FMO3	FMO1	FMO4	PRRC2C	DNM3	SUCO	TNFSF18	TNFSF4	SLC9C2	KLHL20	DARS2	RC3H1	RABGAP1L	GPR52	CACYBP	TNN	TNR	PAPPA2	ASTN1
BRINP2	SEC16B	RASAL2	RALGPS2	ANGPTL1	ABL2	AXDND1	NPHS2	TDRD5	FAM163A	TOR1AIP1	CEP350	XPR1	KIAA1614	MR1	CACNA1E	ZNF648	TEDDM1	RGSL1	RNASEL
NPL	DHX9	SHCBP1L	LAMC1	LAMC2	NMNAT2	SMG7	NCF2	APOBEC4	RGL1	EDEM3	NIBAN1	RNF2	TRMT1L	SWT1	IVNS1ABP	HMCN1	PRG4	TPR	ODR4
PTGS2	PLA2G4A	BRINP3	RGS13	RGS2	UCHL5	GLRX2	CDC73	B3GALT2	KCNT2	CFH	CFHR2	CFHR5	F13B	ASPM	ZBTB41	CRB1	DENND1B	LHX9	NEK7
PTPRC	NR5A2	ZNF281	KIF14	DDX59	CAMSAP2	INAVA	KIF21B	CACNA1S	ASCL5	IGFN1	PKP1	TNNT2	IPO9	LMOD1	TIMM17A	RNPEP	ELF3	PTPN7	LGR6
PPP1R12B	KDM5B	KLHL12	CYB5R1	PPFIA4	CHI3L1	CHIT1	FMOD	OPTC	ATP2B4	ZBED6	SOX13	ETNK2	REN	KISS1	PLEKHA6	PPP1R15B	PIK3C2B	MDM4	LRRN2
NFASC	CNTN2	RBBP5	DSTYK	TMCC2	NUAK2	KLHDC8A	CDK18	MFSD4A	ELK4	SLC45A3	NUCKS1	SLC41A1	PM20D1	SLC26A9	AVPR1B	CTSE	EIF2D	IL10	IL19
IL20	PIGR	C1orf116	PFKFB2	C4BPA	CD55	CR2	CR1	CR1L	CD46	PLXNA2	CAMK1G	LAMB3	TRAF3IP3	C1orf74	UTP25	SYT14	KCNH1	RD3	NEK2
LPGAT1	INTS7	PPP2R5A	NENF	GARIN4	VASH2	ANGEL2	RPS6KC1	PROX1	SMYD2	PTPN14	CENPF	KCTD3	USH2A	ESRRG	GPATCH2	SPATA17	RRP15	TGFB2	LYPLAL1
EPRS1	BPNT1	IARS2	RAB3GAP2	MARK1	MTARC2	HLX	DUSP10	HHIPL2	MIA3	AIDA	FAM177B	DISP1	TLR5	SUSD4	CAPN2	FBXO28	DEGS1	NVL	WDR26
DNAH14	LBR	ENAH	TMEM63A	LEFTY1	PYCR2	SDE2	ACBD3	LIN9	STUM	ITPKB	CDC42BPA	ZNF678	JMJD4	PRSS38	WNT9A	WNT3A	GJC2	IBA57	OBSCN
TRIM17	NUP133	ABCB10	TAF5L	URB2	PGBD5	AGT	TTC13	C1orf131	GNPAT	EXOC8	SPRTN	EGLN1	DISC1	SIPA1L2	MAP10	PCNX2	MAP3K21	KCNK1	SLC35F3
COA6	TARBP1	RBM34	ARID4B	GGPS1	TBCE	B3GALNT2	LYST	NID1	ERO1B	LGALS8	HEATR1	ACTN2	MTR	RYR2	CHRM3	FMN2	RGS7	FH	KMO
OPN3	CHML	WDR64	MAP1LC3C	CEP170	SDCCAG8	AKT3	C1orf100	ADSS2	CATSPERE	COX20	EFCAB2	KIF26B	TFB2M	CNST	SCCPDH	AHCTF1	ZNF695	ZNF496	NLRP3
OR2B11	OR2C3	OR6F1	OR1C1	OR14A16	OR11L1	TRIM58	OR2T8	OR2L8	OR2AK2	OR2L5	OR2L3	OR2L13	OR2M5	OR2M3	OR2M4	OR2T33	OR2T12	OR2M7	OR14C36
OR2T6	OR2T2	OR2G6	OR2T34	OR2T11	OR2T35	SH3BP5L	ZNF672	ZNF692	PGBD2	TUBB8	ZMYND11	DIP2C	LARP4B	GTPBP4	IDI2	WDR37	KLF6	AKR1E2	AKR1C1
AKR1C4	UCN3	TUBAL3	NET1	TASOR2	GDI2	ANKRD16	FBH1	PFKFB3	PRKCQ	SFMBT2	ITIH5	ITIH2	KIN	TAF3	GATA3	USP6NL	PROSER2	UPF2	DHTKD1
SEC61A2	NUDT5	CAMK1D	PHYH	SEPHS1	PRPF18	FRMD4A	FAM107B	CDNF	HSPA14	DCLRE1C	MEIG1	OLAH	RPP38	FAM171A1	ITGA8	MINDY3	PTER	RSU1	CUBN
VIM	ST8SIA6	SLC39A12	NSUN6	ARL5B	MALRD1	PLXDC2	NEBL	SKIDA1	MLLT10	EBLN1	COMMD3	BMI1	SPAG6	PIP4K2A	ARMC3	MSRB2	C10orf67	OTUD1	KIAA1217
ARHGAP21	PRTFDC1	THNSL1	GPR158	MYO3A	GAD2	APBB1IP	PDSS1	ABI1	ANKRD26	YME1L1	MASTL	PTCHD3	MKX	ODAD2	MPP7	WAC	BAMBI	SVIL	JCAD
MTPAP	LYZL2	ZNF438	ZEB1	ARHGAP12	KIF5B	EPC1	CCDC7	ITGB1	NRP1	PARD3	CUL2	CREM	GJD4	FZD8	ANKRD30A	ZNF248	ZNF25	ZNF33A	ZNF37A
ZNF33B	BMS1	RET	CSGALNACT2	HNRNPF	ZNF239	ZNF485	CXCL12	DEPP1	ZNF22	OR13A1	ALOX5	MARCHF8	ZFAND4	WASHC2C	SYT15B	GPRIN2	NPY4R2	ZNF488	RBP3
GDF2	GDF10	FRMPD2	ARHGAP22	WDFY4	LRRC18	VSTM4	FAM170B	TMEM273	C10orf71	DRGX	ERCC6	SLC18A3	CHAT	C10orf53	OGDHL	PARG	AGAP8	MSMB	NCOA4
ASAH2	ASAH2B	CSTF2T	PRKG1	PCDH15	TFAM	PHYHIPL	FAM13C	SLC16A9	CCDC6	ANK3	CDK1	TMEM26	CABCOCO1	ARID5B	RTKN2	ZNF365	EGR2	NRBF2	JMJD1C
CTNNA3	LRRTM3	DNAJC12	SIRT1	HERC4	MYPN	PBLD	HNRNPH3	RUFY2	DNA2	SLC25A16	TET1	CCAR1	STOX1	DDX50	DDX21	VPS26A	HKDC1	HK1	TSPAN15
COL13A1	NPFFR1	LRRC20	NODAL	PALD1	PRF1	ADAMTS14	SGPL1	UNC5B	SLC29A3	CDH23	C10orf105	PSAP	SPOCK2	ASCC1	MICU1	MCU	PLA2G12B	P4HA1	NUDT13
FAM149B1	CFAP70	ANXA7	MSS51	USP54	SYNPO2L	AGAP5	CHCHD1	ZSWIM8	PLAU	VCL	ADK	KAT6B	SAMD8	KCNMA1	DLG5	POLR3A	RPS24	ZMIZ1	SFTPA2
SFTPA1	NUTM2B	MAT1A	PRXL2A	SH2D4B	NRG3	GPR15LG	CDHR1	LRIT2	RGR	CCSER2	GRID1	WAPL	LDB3	BMPR1A	MMRN2	ADIRF	FAM25A	GLUD1	NUTM2A
NUTM2D	MINPP1	PAPSS2	PTEN	LIPJ	LIPF	LIPK	LIPM	STAMBPL1	FAS	LIPA	IFIT1	IFIT5	SLC16A12	KIF20B	HTR7	ANKRD1	PCGF5	HECTD2	PPP1R3C
TNKS2	BTAF1	CPEB3	IDE	KIF11	EXOC6	CYP26C1	CYP26A1	MYOF	FFAR4	PDE6C	SLC35G1	PLCE1	TBC1D12	HELLS	CYP2C18	CYP2C19	CYP2C9	CYP2C8	ACSM6
PDLIM1	SORBS1	ALDH18A1	TCTN3	ENTPD1	CC2D2B	CCNJ	BLNK	DNTT	TLL2	TM9SF3	PIK3AP1	LCOR	SLIT1	RRP12	PGAM1	MMS19	UBTD1	PI4K2A	ZFYVE27
GOLGA7B	CRTAC1	R3HCC1L	LOXL4	HPS1	HPSE2	CUTC	ABCC2	DNMBP	ERLIN1	CHUK	CWF19L1	BLOC1S2	PKD2L1	SCD	WNT8B	SEC31B	PAX2	SLF2	MRPL43
TWNK	LZTS2	PDZD7	TLX1	LBX1	BTRC	POLL	ARMH3	HPS6	PPRC1	ELOVL3	GBF1	PSD	CUEDC2	ACTR1A	SUFU	TRIM8	ARL3	WBP1L	CNNM2
NT5C2	INA	TAF5	PDCD11	CALHM3	SH3PXD2A	SLK	COL17A1	CFAP43	GSTO1	ITPRIP	CFAP58	SORCS3	SORCS1	XPNPEP1	ADD3	SMC3	RBM20	PDCD4	BBIP1
SHOC2	GPAM	ZDHHC6	VTI1A	TCF7L2	NRAP	CASP7	PLEKHS1	DCLRE1A	NHLRC2	CCDC186	TDRD1	VWA2	AFAP1L2	ABLIM1	FHIP2A	TRUB1	ATRNL1	GFRA1	CCDC172
HSPA12A	ENO4	SHTN1	VAX1	KCNK18	PDZD8	EMX2	PRLHR	CACUL1	EIF3A	DENND10	SFXN4	PRDX3	GRK5	RGS10	BAG3	INPP5F	MCMBP	SEC23IP	PLPP4
WDR11	FGFR2	ATE1	TACC2	BTBD16	PLEKHA1	HTRA1	DMBT1	C10orf120	CUZD1	PSTK	IKZF5	ACADSB	GPR26	CPXM2	CHST15	OAT	EEF1AKMT2	ABRAXAS2	ZRANB1
CTBP2	MMP21	UROS	BCCIP	DHX32	ADAM12	C10orf90	DOCK1	FOXI2	CLRN3	PTPRE	MKI67	EBF3	TCERG1L	PPP2R2D	JAKMIP3	DPYSL4	LRRC27	PWWP2B	INPP5A
CFAP46	ADGRA1	KNDC1	UTF1	CALY	PRAP1	PAOX	CYP2E1	RIC8A	SIRT3	PSMD13	NLRP6	PGGHG	IFITM2	B4GALNT4	SIGIRR	ANO9	RNH1	HRAS	PHRF1
CDHR5	DRD4	DEAF1	EPS8L2	TALDO1	CEND1	PNPLA2	CRACR2B	TSPAN4	CHID1	AP2A2	MUC6	MUC2	MUC5B	BRSK2	DUSP8	SYT8	MRPL23	IGF2	TRPM5
KCNQ1	SLC22A18	CARS1	OSBPL5	ZNF195	ART5	ART1	CHRNA10	PGAP2	RHOG	STIM1	RRM1	OR52B4	TRIM21	OR52K2	OR52K1	OR52M1	OR52I1	TRIM68	OR51E1
OR51E2	OR52R1	OR51F2	OR51S1	MMP26	OR51T1	OR51A7	OR51G1	OR51A4	OR51L1	OR52J3	OR52A5	OR52A1	OR51V1	HBB	OR51B2	HBG2	OR51B6	OR51M1	OR51I1
OR51I2	UBQLN3	UBQLNL	OR52H1	OR52B6	OR56B1	OR52N4	OR52N5	OR52N1	OR52E6	OR52E8	OR56A5	OR52W1	C11orf42	FHIP1B	CCKBR	CAVIN3	SMPD1	APBB1	HPX
ARFIP2	DNHD1	RRP8	ILK	TPP1	DCHS1	OR2AG2	OR2AG1	OR6A2	OR10A4	OR2D2	OR2D3	ZNF215	ZNF214	NLRP14	RBMXL2	SYT9	OLFML1	CYB5R2	OVCH2
OR5P2	OR10A6	OR10A3	NLRP10	TUB	RIC3	TRIM66	RPL27A	DENND2B	C11orf16	NRIP3	SCUBE2	DENND5A	TMEM41B	IPO7	ZNF143	WEE1	SBF2	AMPD3	LYVE1
CTR9	EIF4G2	ZBED5	GALNT18	CSNK2A3	USP47	DKK3	MICAL2	TEAD1	BMAL1	BTBD10	RRAS2	COPB1	PDE3B	CYP2R1	INSC	SOX6	C11orf58	PLEKHA7	NUCB2
NCR3LG1	KCNJ11	ABCC8	USH1C	OTOG	MYOD1	KCNC1	TPH1	SAAL1	MRGPRX3	MRGPRX4	SAA4	HPS5	GTF2H1	UEVLD	SPTY2D1	TMEM86A	IGSF22	PTPN5	MRGPRX1
ZDHHC13	CSRP3	E2F8	NAV2	DBX1	HTATIP2	PRMT3	SLC6A5	NELL1	ANO5	SLC17A6	MUC15	ANO3	SLC5A12	FIBIN	BBOX1	LGR4	BDNF	KIF18A	METTL15
KCNA4	FSHB	DCDC1	PAX6	WT1	EIF3M	CCDC73	QSER1	DEPDC7	TCP11L1	CSTF3	HIPK3	KIAA1549L	FBXO3	CAPRIN1	ABTB2	ELF5	APIP	PDHX	CD44
SLC1A2	PAMR1	TRIM44	COMMD9	TRAF6	RAG1	RAG2	IFTAP	LRRC4C	API5	TTC17	ACCSL	ACCS	EXT2	ALX4	CD82	TSPAN18	PRDM11	SYT13	CHST1
MAPK8IP1	LARGE2	PHF21A	DGKZ	CHRM4	AMBRA1	HARBI1	ARHGAP1	F2	CKAP5	LRP4	CSTPP1	PACSIN3	MADD	MYBPC3	SLC39A13	RAPSN	NDUFS3	MTCH2	AGBL2
FNBP4	NUP160	PTPRJ	OR4X2	OR4X1	OR4C3	OR4C5	OR4A47	TRIM49B	TRIM64C	FOLH1	OR4C46	TRIM48	OR4A16	OR4C15	OR4C11	OR4P4	OR4C6	OR5D14	OR5D18
OR5L2	OR5D16	TRIM51	OR5I1	OR5AS1	OR8H2	OR8H3	OR8J3	OR8K5	OR5J2	OR5T3	OR5T1	OR8H1	OR8K3	OR8K1	OR8J1	OR8U3	OR5M9	OR5M3	OR5M11
OR5M10	OR5AP2	OR5AR1	OR9G1	OR9G4	LRRC55	TNKS1BP1	SSRP1	P2RX3	PRG3	PRG2	TIMM10	SMTNL1	YPEL4	CLP1	MED19	TMX2	BTBD18	OR9I1	OR9Q1
OR9Q2	OR1S2	OR10W1	OR5B17	OR5B12	ZFP91	GLYATL1	FAM111B	FAM111A	DTX4	MPEG1	OR5A1	OR4D6	OR4D11	OR4D9	OSBP	PATL1	OR10V1	MRPL16	TCN1
OOSP2	MS4A2	MS4A6A	MS4A4E	MS4A14	MS4A5	MS4A1	MS4A13	MS4A18	CCDC86	PRPF19	TMEM109	TMEM132A	CD6	VPS37C	DDB1	TKFC	TMEM216	PPP1R32	LRRC10B
SYT7	DAGLA	MYRF	FADS3	BEST1	INCENP	SCGB1D4	AHNAK	EEF1G	EML3	ROM1	B3GAT3	GANAB	INTS5	C11orf98	TAF6L	NXF1	WDR74	SLC3A2	CHRM1
SLC22A6	SLC22A8	SLC22A24	SLC22A25	SLC22A10	SLC22A9	PLAAT4	RTN3	MARK2	RCOR2	NAA40	FERMT3	DNAJC4	VEGFB	PLCB3	CCDC88B	RPS6KA4	SLC22A12	NRXN2	RASGRP2
PYGM	MAP4K2	MEN1	CDC42BPG	EHD1	ATG2A	PPP2R5B	BATF2	NAALADL1	CDCA5	VPS51	TM7SF2	FAU	MRPL49	SYVN1	CAPN1	POLA2	DPF2	SCYL1	LTBP3
EHBP1L1	MAP3K11	PCNX3	SIPA1	AP5B1	CFL1	MUS81	EFEMP2	FOSL1	SART1	CATSPER1	GAL3ST3	PACS1	CD248	RIN1	BRMS1	NPAS4	MRPL11	DPP3	CTSF
CCDC87	CCS	RBM14	SPTBN2	C11orf80	PC	LRFN4	SYT12	RHOD	KDM2A	GRK2	SSH3	CORO1B	GPR152	CABP4	PITPNM1	NDUFV1	NUDT8	TBX10	ACY3
TCIRG1	KMT5B	C11orf24	LRP5	PPP6R3	TESMIN	CPT1A	IGHMBP2	MRGPRF	TPCN2	CCND1	FADD	PPFIA1	SHANK2	DHCR7	NADSYN1	NUMA1	LRTOMT	ANAPC15	INPPL1
CLPB	PDE2A	FCHSD2	ARHGEF17	RELT	FAM168A	PAAF1	DNAJB13	C2CD3	PPME1	P4HA3	POLD3	CHRDL2	RNF169	SLCO2B1	ARRB1	RPS3	GDPD5	MAP6	MOGAT2
UVRAG	WNT11	THAP12	GVQW3	EMSY	LRRC32	CAPN5	MYO7A	GDPD4	CLNS1A	RSF1	INTS4	ALG8	KCTD21	USP35	NARS2	TENM4	FAM181B	DDIAS	PCF11
ANKRD42	DLG2	CCDC89	SYTL2	CCDC83	PICALM	EED	HIKESHI	CCDC81	ME3	PRSS23	TMEM135	RAB38	GRM5	TYR	NOX4	TRIM77	TRIM49	TRIM64B	TRIM49C
UBTFL1	NAALAD2	CHORDC1	FAT3	MTNR1B	DEUP1	CEP295	TAF1D	HEPHL1	IZUMO1R	GPR83	MRE11	PIWIL4	AMOTL1	KDM4E	SESN3	CEP57	MTMR2	MAML2	CCDC82
JRKL	CNTN5	ARHGAP42	PGR	TRPC6	CEP126	YAP1	BIRC3	BIRC2	MMP7	MMP20	MMP27	MMP8	MMP10	MMP1	MMP13	DCUN1D5	DYNC2H1	PDGFD	DDI1
CASP5	CASP1	CARD16	CARD18	MSANTD4	KBTBD3	GUCY1A2	CWF19L2	ELMOD1	CUL5	ACAT1	NPAT	ATM	EXPH5	DDX10	RDX	ARHGAP20	SIK2	PPP2R1B	ALG9
DLAT	NKAPD1	SDHD	TEX12	PTS	PLET1	NCAM1	TTC12	ANKK1	DRD2	TMPRSS5	ZW10	USP28	HTR3A	ZBTB16	C11orf71	REXO2	NXPE1	NXPE2	BUD13
ZPR1	APOA5	APOA4	SIK3	PAFAH1B2	RNF214	BACE1	CEP164	DSCAML1	TMPRSS13	TMPRSS4	SCN4B	JAML	UBE4A	KMT2A	TMEM25	ARCN1	PHLDB1	CXCR5	BCL9L
UPK2	SLC37A4	HYOU1	C2CD2L	CCDC153	CBL	MCAM	C1QTNF5	MFRP	USP2	TRIM29	POU2F3	TLCD5	ARHGEF12	GRIK4	TBCEL	TECTA	SORL1	UBASH3B	CRTAM
JHY	HSPA8	GRAMD1B	OR6X1	OR6M1	TMEM225	OR8D4	OR4D5	OR10G8	OR10G7	VWA5A	OR8G2P	OR8G5	OR8D1	OR8D2	OR8B2	OR8B8	OR8B12	OR8A1	PANX3
SIAE	SPA17	ESAM	MSANTD2	ROBO3	ROBO4	HEPN1	HEPACAM	CCDC15	SLC37A2	PKNOX2	FEZ1	STT3A	CHEK1	PATE3	PATE4	HYLS1	DDX25	CDON	FAM118B
SRPRA	DCPS	ST3GAL4	KIRREL3	ETS1	FLI1	KCNJ1	ARHGAP32	TMEM45B	NFRKB	PRDM10	APLP2	ST14	ZBTB44	ADAMTS8	ADAMTS15	SNX19	NTM	OPCML	IGSF9B
JAM3	NCAPD3	VPS26B	THYN1	ACAD8	GLB1L3	GLB1L2	B3GAT1	IQSEC3	SLC6A12	KDM5A	B4GALNT3	WNK1	ERC1	ADIPOR2	LRTM2	CACNA2D4	DCP1B	CACNA1C	NRIP2
ITFG2	FOXM1	TULP3	TEAD4	TSPAN9	PRMT8	PARP11	C12orf4	RAD51AP1	DYRK4	AKAP3	NDUFA9	KCNA6	KCNA1	KCNA5	NTF3	ANO2	VWF	TNFRSF1A	SCNN1A
LTBR	MRPL51	NCAPD2	GAPDH	IFFO1	NOP2	ACRBP	ZNF384	MLF2	CD4	GPR162	CDCA3	TPI1	LRRC23	ATN1	C12orf57	PTPN6	C1S	C1RL	CLSTN3
PEX5	ACSM4	CD163L1	CD163	GDF3	DPPA3	CLEC4C	NANOGNB	NANOG	SLC2A3	C3AR1	NECAP1	CLEC4A	ZNF705A	FAM90A1	CLEC4E	AICDA	MFAP5	A2ML1	PHC1
KLRG1	A2M	PZP	KLRB1	CD69	KLRF1	CLEC9A	CLEC7A	TMEM52B	KLRK1	KLRC4	MAGOHB	STYK1	YBX3	TAS2R7	TAS2R8	TAS2R9	TAS2R10	PRR4	TAS2R13
PRH2	PRH1	TAS2R50	TAS2R20	TAS2R46	TAS2R30	TAS2R42	PRB3	PRB1	ETV6	BCL2L14	MANSC1	BORCS5	DUSP16	CREBL2	GPR19	APOLD1	GPRC5A	GPRC5D	FAM234B
GRIN2B	ATF7IP	GUCY2C	WBP11	C12orf60	ERP27	PTPRO	EPS8	STRAP	DERA	SLC15A5	MGST1	RERGL	PIK3C2G	PLCZ1	PLEKHA5	AEBP2	PDE3A	SLCO1C1	SLCO1B3
SLCO1B1	SLCO1A2	PYROXD1	RECQL	SPX	GYS2	KCNJ8	ABCC9	CMAS	ST8SIA1	C2CD5	SOX5	BCAT1	IRAG2	DNAI7	KRAS	LMNTD1	RASSF8	BHLHE41	ITPR2
INTS13	STK38L	BMAL2	SMCO2	PPFIBP1	MANSC4	PTHLH	CCDC91	FAR2	OVCH1	TMTC1	IPO8	CAPRIN2	TSPAN11	DDX11	BICD1	FGD4	DNM1L	YARS2	PKP2
SYT10	ALG10	CPNE8	KIF21A	ABCD2	C12orf40	LRRK2	CNTN1	PDZRN4	GXYLT1	YAF2	PPHLN1	PRICKLE1	ADAMTS20	PUS7L	TWF1	TMEM117	NELL2	DBX2	ANO6
ARID2	SCAF11	SLC38A1	PCED1B	RPAP3	ENDOU	RAPGEF3	COL2A1	SENP1	PFKM	CCDC184	OR10AD1	OR8S1	KANSL2	CCNT1	CACNB3	WNT10B	KMT2D	DHH	LMBR1L
TUBA1A	PRPH	TROAP	SPATS2	KCNH3	MCRS1	PRPF40B	FMNL3	NCKAP5L	AQP2	AQP6	ASIC1	SMARCD1	GPD1	LIMA1	FAM186A	LARP4	DIP2B	TMPRSS12	SLC11A2
LETMD1	CSRNP2	DAZAP2	BIN2	SLC4A8	SCN8A	ANKRD33	ACVR1B	ATG101	KRT7	KRT86	KRT85	KRT82	KRT75	KRT6C	KRT5	KRT71	KRT74	KRT73	KRT2
KRT1	KRT76	KRT3	KRT4	KRT8	EIF4B	TNS2	IGFBP6	SOAT2	CSAD	ZNF740	MFSD5	ESPL1	AAAS	SP7	SP1	AMHR2	PCBP2	TARBP2	HOXC11
HOXC10	COPZ1	ITGA5	GTSF1	NCKAP1L	PPP1R1A	TESPA1	NEUROD4	OR9K2	OR10A7	OR6C74	OR6C6	OR6C1	OR6C75	OR6C65	OR6C2	OR6C70	OR6C68	OR2AP1	OR10P1
METTL7B	ITGA7	BLOC1S1	DNAJC14	MMP19	PYM1	DGKA	PMEL	ERBB3	PA2G4	ESYT1	SMARCC2	SLC39A5	ANKRD52	COQ10A	PAN2	STAT2	APOF	TIMELESS	MIP
RBMS2	BAZ2A	ATP5F1B	NACA	SDR9C7	GPR182	ZBTB39	MYO1A	LRP1	NXPH4	STAC3	R3HDM2	INHBE	GLI1	ARHGAP9	MBD6	DCTN2	KIF5A	B4GALNT1	OS9
AGAP2	CYP27B1	METTL1	AVIL	LRIG3	SLC16A7	USP15	MON2	PPM1H	RXYLT1	SRGAP1	KICS2	C12orf56	XPOT	TBK1	LEMD3	MSRB3	IRAK3	HELB	GRIP1
CAND1	DYRK2	IL22	MDM1	RAP1B	NUP107	CPM	CPSF6	FRS2	CCT2	BEST3	RAB3IP	MYRFL	CNOT2	PTPRB	PTPRR	TSPAN8	LGR5	ZFC3H1	RAB21
TBC1D15	TPH2	TRHDE	KCNC2	CAPS2	GLIPR1L2	GLIPR1	KRR1	NAP1L1	BBS10	OSBPL8	CSRP2	NAV3	SYT1	PAWR	PPP1R12A	OTOGL	PTPRQ	MYF5	LIN7A
ACSS3	PPFIA2	CCDC59	METTL25	SLC6A15	TSPAN19	LRRIQ1	ALX1	RASSF9	NTS	MGAT4C	C12orf50	CEP290	TMTC3	DUSP6	POC1B	ATP2B1	KERA	DCN	PLEKHG7
EEA1	UBE2N	SOCS2	CRADD	PLXNC1	CEP83	TMCC3	NDUFA12	FGD6	VEZT	METAP2	USP44	NTN4	SNRPF	CCDC38	HAL	LTA4H	ELK3	CDK17	CFAP54
NEDD1	TMPO	IKBIP	APAF1	ANKS1B	GARIN6	BLTP3B	ACTR6	DEPDC4	SCYL2	NR1H4	GAS2L3	ANO4	UTP20	ARL1	SPIC	MYBPC1	CHPT1	SYCP3	GNPTAB
DRAM1	NUP37	PARPBP	IGF1	PAH	STAB2	NT5DC3	C12orf73	TDG	HCFC2	CHST11	NOPCHAP1	ALDH1L2	WASHC4	APPL2	NUAK1	TCP11L2	POLR3B	RFX4	RIC8B
TMEM263	ABTB3	PWP1	ASCL4	WSCD2	CMKLR1	FICD	SART3	ISCU	TMEM119	SELPLG	SSH1	DAO	SVOP	USP30	ALKBH2	ACACB	FOXN4	MYO1H	KCTD10
UBE3B	MMAB	MVK	FAM222A	TRPV4	ANKRD13A	ATP2A2	ANAPC7	VPS29	RAD9B	PPTC7	TCTN1	PPP1CC	CCDC63	MYL2	CUX2	SH2B3	ATXN2	BRAP	ACAD10
MAPKAPK5	TMEM116	ERP29	NAA25	TRAFD1	HECTD4	RPL6	PTPN11	RPH3A	OAS3	OAS2	DTX1	RASAL1	DDX54	RITA1	TPCN1	SLC8B1	PLBD2	SDS	RBM19
TBX5	TBX3	MED13L	SPRING1	RNFT2	FBXW8	FBXO21	NOS1	KSR2	VSIG10	PEBP1	TAOK3	SRRM4	CCDC60	PRKAB1	CIT	RAB35	GCN1	RPLP0	SIRT4
TRIAP1	SRSF9	RNF10	CABP1	MLEC	SPPL3	C12orf43	P2RX7	P2RX4	CAMKK2	ANAPC5	RNF34	KDM2B	MORN3	SETD1B	HPD	CFAP251	LRRC43	CLIP1	ZCCHC8
RSRC2	KNTC1	HCAR2	HCAR3	CCDC62	HIP1R	ABCB9	OGFOD2	PITPNM2	CDK2AP1	SBNO1	SNRNP35	DDX55	GTF2H3	TCTN2	ATP6V0A2	DNAH10	CCDC92	NCOR2	DHX37
TMEM132B	TMEM132C	SLC15A4	GLT1D1	TMEM132D	FZD10	PIWIL1	RIMBP2	STX2	SFSWAP	ULK1	EP400	GALNT9	FBRSL1	P2RX2	POLE	PGAM5	ANKLE2	GOLGA3	ZNF605
ZNF140	ZNF891	ZNF10	ZNF268	TUBA3C	TPTE2	MPHOSPH8	PSPC1	ZMYM5	ZMYM2	GJA3	GJB6	CRYL1	IFT88	EEF1AKMT1	XPO4	LATS2	SAP18	SACS	MIPEP
C1QTNF9B	C1QTNF9	PARP4	ATP12A	RNF17	CENPJ	PABPC3	AMER2	MTMR6	NUP58	ATP8A2	SHISA2	RNF6	CDK8	WASF3	GPR12	USP12	RASL11A	GTF3A	MTIF3
POLR1D	GSX1	PDX1	CDX2	FLT3	FLT1	SLC46A3	MTUS2	SLC7A1	KATNAL1	HMGB1	USPL1	ALOX5AP	MEDAG	TEX26	HSPH1	B3GLCT	RXFP2	FRY	BRCA2
N4BP2L1	N4BP2L2	PDS5B	KL	STARD13	RFC3	NBEA	MAB21L1	DCLK1	SOHLH2	SPART	RFXAP	SMAD9	ALG5	EXOSC8	SUPT20H	CSNK1A1L	POSTN	TRPC4	FREM2
STOML3	COG6	MRPS31	SLC25A15	ELF1	WBP4	KBTBD7	MTRF1	NAA16	VWA8	DGKH	AKAP11	TNFSF11	ENOX1	CCDC122	COG3	ERICH6B	CBY2	SIAH3	ZC3H13
CPB2	LCP1	RUBCNL	LRCH1	ESD	HTR2A	NUDT15	RB1	CYSLTR2	FNDC3A	SETDB2	PHF11	RCBTB1	EBPL	KPNA3	SPRYD7	TRIM13	FAM124A	SERPINE3	INTS6
WDFY2	CCDC70	ATP7B	ALG11	UTP14C	NEK5	NEK3	THSD1	VPS36	CKAP2	HNRNPA1L2	CNMD	PCDH8	OLFM4	PCDH17	DIAPH3	TDRD3	PCDH20	PCDH9	KLHL1
DACH1	MZT1	DIS3	PIBF1	TBC1D4	LMO7	KCTD12	CLN5	MYCBP2	EDNRB	OBI1	RBM26	SLITRK1	SLITRK6	SLITRK5	GPC6	DCT	SOX21	ABCC4	DZIP1
DNAJC3	UGGT2	HS6ST3	OXGR1	MBNL2	IPO5	FARP1	STK24	SLC15A1	DOCK9	UBAC2	TM9SF2	CLYBL	PCCA	TMTC4	NALCN	ITGBL1	FGF14	TPP2	METTL21C
CCDC168	POGLUT2	SLC10A2	ARGLU1	NALF1	LIG4	TNFSF13B	MYO16	IRS2	COL4A1	COL4A2	RAB20	ING1	ANKRD10	ARHGEF7	TEX29	SPACA7	TUBGCP3	MCF2L	F7
PROZ	CUL4A	ADPRHL1	TMCO3	TFDP1	ATP4B	GRK1	RASA3	CDC16	UPF3A	CHAMP1	OR11H12	POTEG	OR11H2	OR4Q3	OR4N2	OR4K2	OR4K5	OR4K1	OR4K15
OR4Q2	OR4K14	OR4K13	OR4L1	OR4K17	OR4N5	OR11G2	OR11H6	OR11H4	TTC5	CCNB1IP1	TEP1	KLHL33	OSGEP	PIP4P1	RNASE4	EDDM3B	RNASE8	HNRNPC	RPGRIP1
CHD8	RAB2B	METTL3	SALL2	OR4E2	MMP14	LRP10	RBM23	PRMT5	C14orf93	ACIN1	SLC7A8	BCL2L2	PABPN1	SLC22A17	EFS	IL25	CMTM5	MYH6	MYH7
NGDN	ZFHX2	AP1G2	DHRS2	DHRS4	CARMIL3	NRL	DCAF11	FITM1	PSME1	RNF31	IRF9	IPO4	TM9SF1	MDP1	TGM1	RABGGTA	DHRS1	CIDEB	ADCY4
RIPK3	NFATC4	NYNRIN	CBLN3	KHNYN	SDR39U1	NOVA1	FOXG1	PRKD1	G2E3	STRN3	AP4S1	HECTD1	HEATR5A	ARHGAP5	AKAP6	NPAS3	EGLN3	EAPP	SNX6
CFL2	BAZ1A	SRP54	FAM177A1	PRORP	NFKBIA	INSM2	RALGAPA1	MBIP	PAX9	SLC25A21	MIPOL1	FOXA1	TTC6	SSTR1	CLEC14A	SEC23A	TRAPPC6B	MIA2	LRFN5
FSCB	C14orf28	KLHL28	TOGARAM1	FANCM	MIS18BP1	RPL10L	MDGA2	LRR1	NEMF	VCPKMT	SOS2	MAP4K5	SAV1	NIN	PYGL	TMX1	FRMD6	NID2	PTGDR
TXNDC16	ERO1A	PSMC6	STYX	GNPNAT1	DDHD1	BMP4	CDKN3	GMFB	SAMD4A	GCH1	WDHD1	SOCS4	DLGAP5	FBXO34	ATG14	KTN1	PELI2	TMEM260	OTX2
EXOC5	NAA30	CCDC198	ARMH4	ACTR10	ARID4A	TOMM20L	KIAA0586	DACT1	DAAM1	L3HYPDH	CCDC175	RTN1	PCNX4	C14orf39	SIX6	SIX4	SLC38A6	TMEM30B	PRKCH
KCNH5	RHOJ	PPP2R5E	WDR89	SGPP1	SYNE2	ESR2	MTHFD1	AKAP5	ZBTB25	PLEKHG3	SPTB	FNTB	MAX	FUT8	GPHN	PALS1	ATP6V1D	EIF2S1	PLEK2
PLEKHH1	ARG2	RDH11	RDH12	ZFYVE26	RAD51B	ACTN1	EXD2	GALNT16	PLEKHD1	SUSD6	SLC10A1	SLC8A3	COX16	ADAM21	ADAM20	MAP3K9	PCNX1	SIPA1L1	RGS6
DPF3	ZFYVE1	RBM25	PAPLN	HEATR4	ACOT4	MIDEAS	PTGR2	FAM161B	BBOF1	ABCD4	VRTN	SYNDIG1L	NPC2	LTBP2	AREL1	YLPM1	DLST	RPS6KL1	MLH3
ZC2HC1C	FOS	JDP2	BATF	FLVCR2	TTLL5	TGFB3	GPATCH2L	ESRRB	ANGEL1	LRRC74A	IRF2BPL	TMEM63C	GSTZ1	TMED8	VIPAS39	SPTLC2	SLIRP	ADCK1	NRXN3
CEP128	TSHR	SEL1L	FLRT2	GALC	KCNK10	SPATA7	PTPN21	ZC3H14	EML5	TTC8	FOXN3	EFCAB11	TDP1	KCNK13	PSMC1	NRDE2	TTC7B	RPS6KA5	GPR68
CCDC88C	PPP4R3A	CATSPERB	TC2N	FBLN5	TRIP11	ATXN3	SLC24A4	RIN3	LGMN	GOLGA5	MOAP1	BTBD7	COX8C	UNC79	PRIMA1	DDX24	IFI27L1	PPP4R4	SERPINA11
SERPINA12	SERPINA4	GSC	DICER1	SYNE3	BDKRB2	ATG2B	AK7	PAPOLA	VRK1	BCL11B	SETD3	HHIPL1	CYP46A1	EML1	DEGS2	SLC25A29	SLC25A47	WDR25	DLK1
RTL1	PPP2R5C	DYNC1H1	HSP90AA1	WDR20	MOK	TECPR2	AMN	CDC42BPB	TNFAIP2	EIF5	MARK3	XRCC3	ZFYVE21	PPP1R13B	TDRD9	ASPG	KIF26A	TMEM179	INF2
SIVA1	AKT1	CEP170B	PLD4	AHNAK2	CRIP1	TEDC1	TMEM121	OR4N4C	GOLGA6L22	TUBGCP5	CYFIP1	NIPA2	GOLGA6L2	MKRN3	MAGEL2	NDN	NPAP1	SNURF	UBE3A
ATP10A	GABRB3	OCA2	HERC2	APBA2	ENTREP2	TJP1	GOLGA8J	CHRFAM7A	ARHGAP11B	FAN1	MTMR10	TRPM1	KLF13	OTUD7A	GOLGA8K	GOLGA8O	FMN1	RYR3	AVEN
EMC7	PGBD4	EMC4	SLC12A6	NUTM1	LPCAT4	ACTC1	AQR	ZNF770	DPH6	CDIN1	MEIS2	SPRED1	FAM98B	THBS1	FSIP1	EIF2AK4	BUB1B	PLCB2	CCDC9B
DISP2	BAHD1	CCDC32	RPUSD2	KNL1	RMDN3	DNAJC17	VPS18	CHAC1	INO80	EXD1	LTK	MGA	MAPKBP1	SPTBN5	PLA2G4E	PLA2G4F	VPS39	GANC	ZNF106
LRRC57	STARD9	CDAN1	TTBK2	UBR1	TMEM62	EPB42	TGM5	LCMT2	TUBGCP4	TP53BP1	MAP1A	PPIP5K1	CKMT1B	MFAP1	WDR76	FRMD5	CTDSPL2	SPG11	B2M
TRIM69	TERB2	SORD	DUOX2	DUOXA2	DUOXA1	DUOX1	SLC28A2	GATM	SLC30A4	SEMA6D	MYEF2	SLC12A1	FBN1	CEP152	SHC4	EID1	SECISBP2L	COPS2	FAM227B
FGF7	ATP8B4	SLC27A2	HDC	GABPB1	USP8	TRPM7	SPPL2A	AP4E1	TNFAIP8L3	CYP19A1	GLDN	DMXL2	SCG3	TMOD3	LEO1	GNB5	MYO5C	MYO5A	ATOSA
ONECUT1	WDR72	UNC13C	RSL24D1	RAB27A	PIGB	CCPG1	DNAAF4	PYGO1	PRTG	NEDD4	RFX7	MNS1	ZNF280D	TCF12	MYZAP	GCOM1	ALDH1A2	LIPC	ADAM10
SLTM	RNF111	CCNB2	MYO1E	LDHAL6B	GCNT3	ICE2	RORA	VPS13C	C2CD4A	TLN2	TPM1	APH1B	HERC1	DAPK2	SNX1	CSNK1G1	TRIP4	ZNF609	PIF1
KBTBD13	CLPX	CILP	IGDCC4	DPP8	HACD3	INTS14	SLC24A1	DENND4A	RAB11A	MEGF11	DIS3L	TIPIN	MAP2K1	RPL4	ZWILCH	LCTL	SMAD6	SMAD3	IQCH
MAP2K5	SKOR1	PIAS1	FEM1B	ITGA11	ANP32A	NOX5	GLCE	KIF23	TLE3	UACA	THAP10	LRRC49	THSD4	NR2E3	MYO9A	SENP8	GRAMD2A	PKM	PARP6
HEXA	TMEM202	BBS4	ADPGK	NEO1	HCN4	REC114	CD276	INSYN1	TBC1D21	STOML1	PML	ISLR	STRA6	CCDC33	CYP11A1	ARID3B	CLK3	EDC3	CYP1A1
CYP1A2	CPLX3	SCAMP2	COX5A	C15orf39	GOLGA6C	GOLGA6D	COMMD4	MAN2C1	SIN3A	PTPN9	SNX33	CSPG4	ODF3L1	UBE2Q2	FBXO22	TMEM266	ISL2	SCAPER	PSTPIP1
PEAK1	HMG20A	TBC1D2B	SH2D7	IDH3A	DNAJA4	IREB2	CHRNA5	CHRNA3	CHRNB4	ADAMTS7	MORF4L1	RASGRF1	ANKRD34C	MINAR1	ZFAND6	ARNT2	CEMIP	MESD	TLNRD1
CFAP161	IL16	STARD5	TMC3	MEX3B	SAXO2	AP3B2	FSD2	WHAMM	HOMER2	C15orf40	BTBD1	BNC1	SH3GL3	ADAMTSL3	GOLGA6L4	WDR73	SEC11A	ZNF592	ALPK3
SLC28A1	PDE8A	AKAP13	AGBL1	NTRK3	ISG20	ACAN	FANCI	RHCG	TICRR	KIF7	PLIN1	PEX11A	WDR93	MESP2	ANPEP	AP3S2	ZNF710	SEMA4B	GDPGP1
IQGAP1	CRTC3	BLM	FES	MAN2A2	RCCD1	PRC1	SV2B	SLCO3A1	CHD2	MCTP2	ARRDC4	IGF1R	LRRC28	MEF2A	LYSMD4	ADAMTS17	CERS3	LINS1	ALDH1A3
LRRK1	TARS3	OR4F15	RHBDF1	HBA1	RGS11	AXIN1	DECR2	PRR35	RAB40C	WFIKKN1	WDR90	RHOT2	WDR24	CCDC78	HAGHL	CHTF18	LMF1	SOX8	SSTR5
C1QTNF8	CACNA1H	BAIAP3	CLCN7	TELO2	IFT140	CRAMP1	JPT2	MAPK8IP3	EME2	MEIOB	HS3ST6	RPL3L	ZNF598	NPW	NTHL1	TSC2	PKD1	CASKIN1	MLST8
BRICD5	E4F1	ABCA3	CCNF	TBC1D24	SRRM2	PRSS41	PRSS21	PRSS22	CLDN9	MMP25	ZSCAN10	ZNF213	OR1F1	TIGD7	ZNF75A	OR2C1	C16orf90	NLRC3	SLX4
TRAP1	CREBBP	ADCY9	SRL	TFAP4	GLIS2	PAM16	DNAJA3	NMRAL1	HMOX2	C16orf96	MGRN1	DNAAF8	GLYR1	UBN1	PPL	SEC14L5	NAGPA	ALG1	RBFOX1
ABAT	PMM2	USP7	GRIN2A	ATF7IP2	TEKT5	TVP23A	CIITA	CLEC16A	TNP2	PRM2	TXNDC11	ZC3H7A	TNFRSF17	SNX29	CPPED1	ERCC4	MRTFB	PARN	NOMO1
PDXDC1	NTAN1	RRN3	MPV17L	BMERB1	MARF1	NDE1	MYH11	ABCC1	ABCC6	XYLT1	NPIPA8	NOMO2	SMG1	CLEC19A	TMC5	GDE1	CCP110	VPS35L	GPRC5B
GPR139	GP2	UMOD	PDILT	ACSM5	ACSM2A	ACSM2B	ACSM3	THUMPD1	ERI2	DNAH3	ZP2	ANKS4B	METTL9	OTOA	UQCRC2	VWA3A	EEF2K	CDR2	HS3ST2
USP31	SCNN1G	GGA2	PALB2	PRKCB	CACNG3	RBBP6	TNRC6A	ARHGAP17	LCMT1	ZKSCAN2	HS3ST4	C16orf82	KDM8	NSMCE1	IL4R	IL21R	GTF3C1	KATNIP	GSG1L
XPO6	NPIPB6	APOBR	IL27	SGF29	ATXN2L	TUFM	SH2B1	ATP2A1	RABEP2	CD19	NFATC2IP	SPNS1	C16orf54	KIF22	MAZ	PRRT2	MVP	CDIPT	ASPHD1
TAOK2	INO80E	DOC2A	C16orf92	TBX6	YPEL3	MAPK3	TBC1D10B	SEPTIN1	ZNF48	ZNF771	ITGAL	ZNF768	ZNF747	ZNF764	ZNF688	ZNF785	PRR14	FBRS	SRCAP
PHKG2	RNF40	ZNF629	BCL7C	FBXL19	SETD1A	STX4	ZNF668	ZNF646	KAT8	PRSS36	TRIM72	ITGAM	ITGAX	ITGAD	ARMC5	SLC5A2	ZNF267	TP53TG3D	SHCBP1
VPS35	GPT2	DNAJA2	NETO2	PHKB	ABCC12	ABCC11	LONP2	SIAH1	N4BP1	CBLN1	ZNF423	HEATR3	TENT4B	BRD7	SNX20	NOD2	CYLD	SALL1	TOX3
CHD9	RBL2	RPGRIP1L	FTO	IRX5	IRX6	MMP2	LPCAT2	CAPNS2	SLC6A2	CES1	CES5A	GNAO1	AMFR	NUDT21	BBS2	MT1A	NUP93	SLC12A3	NLRC5
CPNE2	PLLP	CCL22	CIAPIN1	ADGRG5	ADGRG1	DRC7	KIFC3	CNGB1	TEPP	ZNF319	MMP15	CSNK2A2	CCDC113	SETD6	CNOT1	CDH8	CDH11	CDH5	BEAN1
CKLF	CMTM2	CMTM4	TERB1	PDP2	CDH16	CES3	CES4A	B3GNT9	HSF4	MATCAP1	EXOC3L1	E2F4	ELMO3	FHOD1	PLEKHG4	KCTD19	LRRC36	TPPP3	ZDHHC1
RIPOR1	CTCF	CARMIL2	PARD6A	RANBP10	EDC4	PSKH1	CTRL	SLC12A4	DPEP3	DPEP2	DUS2	NFATC3	ESRP2	SLC7A6	SLC7A6OS	PRMT7	ZFP90	CDH1	HAS3
UTP4	SNTB2	PDF	NFAT5	NOB1	WWP2	PDPR	AARS1	DDX19B	ST3GAL2	SF3B3	IL34	MTSS2	VAC14	HYDIN	CMTR2	CALB2	ZNF23	ZNF19	TAT
PHLPP2	ATXN1L	TXNL4B	HPR	DHX38	PMFBP1	ZFHX3	PSMD7	NPIPB15	GLG1	RFWD3	MLKL	FA2H	WDR59	ZFP1	BCAR1	KARS1	TERF2IP	CNTNAP4	MON1B
ADAMTS18	NUDT7	VAT1L	WWOX	MAF	CDYL2	CENPN	ATMIN	PKD1L2	BCO1	CMIP	PLCG2	SDR42E1	HSD17B2	HSBP1	MLYCD	NECAB2	SLC38A8	MBTPS1	DNAAF1
TAF1C	ADAD2	KCNG4	ATP2C2	MEAK7	KLHL36	CRISPLD2	KIAA0513	GSE1	COX4I1	FBXO31	MAP1LC3B	ZCCHC14	JPH3	SLC7A5	CA5A	ZNF469	ZFPM1	ZC3H18	SNAI3
RNF166	CTU2	PIEZO1	CDT1	PABPN1L	CBFA2T3	ACSF3	ZNF778	ANKRD11	SPG7	CPNE7	DPEP1	CHMP1A	CDK10	ZNF276	FANCA	TCF25	MC1R	DEF8	GAS8
VPS53	NXN	ABR	YWHAE	MYO1C	INPP5K	PITPNA	SCARF1	PRPF8	TLCD2	WDR81	RPA1	RTN4RL1	SRR	SGSM2	METTL16	CLUH	RAP1GAP2	OR1D2	OR1G1
OR1A1	OR1E1	OR3A3	OR1E2	SPATA22	TRPV3	CTNS	EMC6	ITGAE	CAMKK1	P2RX1	ATP2A3	ZZEF1	CYB5D2	ANKFY1	SPNS3	MYBBP1A	GGT6	SMTNL2	ALOX15
PELP1	ARRB2	MED11	ZMYND15	MINK1	C17orf107	ENO3	SPAG7	CAMTA2	KIF1C	ZFP3	ZNF232	USP6	ZNF594	RABEP1	RPAIN	DHX33	DERL2	NLRP1	WSCD1
AIPL1	PIMREG	PITPNM3	KIAA0753	TXNDC17	XAF1	TEKT1	BCL6B	ACADVL	PHF23	YBX2	GPS2	NEURL4	ACAP1	NLGN2	SPEM1	ZBTB4	POLR2A	TNFSF13	MPDU1
FXR2	SAT2	TP53	DNAH2	KDM6B	CHD3	CNTROB	GUCY2D	ALOX12B	ALOXE3	PER1	BORCS6	CTC1	PFAS	SLC25A35	ARHGEF15	KRBA2	NDEL1	MYH10	MFSD6L
PIK3R5	STX8	USP43	GSG1L2	GLP2R	GAS7	MYH13	MYH8	MYH4	MYH1	MYH2	MYH3	ADPRM	TMEM220	DNAH9	MAP2K4	MYOCD	ARHGAP44	HS3ST3A1	CDRT15
TEKT3	CDRT1	TTC19	NCOR1	UBB	TRPV2	ZNF287	ZNF624	CCDC144A	MPRIP	COPS3	RASD1	PEMT	RAI1	TOM1L2	GID4	DRG2	MYO15A	LLGL1	FLII
TOP3A	SMCR8	SHMT1	EVPLL	FBXW10	PRPSAP2	SLC5A10	MAPK7	RNF112	SLC47A1	ALDH3A2	ULK2	SPECC1	CDRT15L2	DHRS7B	TMEM11	KCNJ12	WSB1	KSR1	NOS2
NLK	TMEM97	TNFAIP1	SEBOX	VTN	SARM1	SLC46A1	SLC13A2	SPAG5	BLTP2	SUPT6H	PROCA1	TLCD1	TRAF4	FAM222B	FLOT2	PHF12	PIPOX	MYO18A	CRYBA1
NUFIP2	TAOK1	ABHD15	GIT1	ANKRD13B	CORO6	SSH2	EFCAB5	NSRP1	SLC6A4	BLMH	TMIGD1	CPD	GOSR1	CRLF3	ATAD5	TEFM	ADAP2	NF1	EVI2B
RAB11FIP4	COPRS	SUZ12	LRRC37B	RHOT1	RHBDL3	C17orf75	MYO1D	TMEM98	SPACA3	ASIC2	CCL7	CCL11	CCL8	TMEM132E	CCT6B	ZNF830	LIG3	RFFL	FNDC8
UNC45B	SLFN5	SLFN11	SLFN13	SLFN12L	SLFN14	PEX12	RASL10B	GAS2L2	C17orf50	TAF15	LYZL6	CCL4L2	PIGW	GGNBP2	DHRS11	LHX1	AATF	ACACA	TADA2A
SYNRG	DDX52	HNF1B	GPR179	ARHGAP23	SRCIN1	EPOP	MLLT6	LASP1	MED1	CDK12	NEUROD2	PPP1R1B	STARD3	ERBB2	GRB7	ZPBP2	GSDMB	GSDMA	THRA
NR1D1	CASC3	RAPGEFL1	RARA	TOP2A	TNS4	SMARCE1	KRT26	KRT27	KRT28	KRT10	KRT12	KRT20	KRT23	KRT39	KRT33A	KRT33B	KRT34	KRT31	KRT37
KRT32	KRT35	KRT36	KRT13	KRT19	KRT14	KRT17	HAP1	KLHL10	KLHL11	ACLY	DNAJC7	ZNF385C	KAT2A	STAT5B	STAT5A	STAT3	ATP6V0A1	TUBG2	PLEKHH3
CNTNAP1	EZH1	VPS25	WNK4	COA3	CNTD1	PSME3	AOC3	AARSD1	BRCA1	DHX8	ETV4	MEOX1	CFAP97D1	MPP3	MPP2	NAGS	G6PC3	HDAC5	HROB
TMUB2	ATXN7L3	UBTF	SLC4A1	RUNDC3A	SLC25A39	GRN	FAM171A2	ITGA2B	GPATCH8	FZD2	MEIOC	DBF4B	ADAM11	GJC1	HIGD1B	EFTUD2	CCDC103	KIF18B	NMT1
ACBD4	FMNL1	PLEKHM1	SPPL2C	MAPT	KANSL1	NSF	WNT3	CDC27	ITGB3	EFCAB13	KPNB1	OSBPL7	SP2	NFE2L1	CBX1	HOXB2	HOXB13	TTLL6	CALCOCO2
IGF2BP1	B4GALNT2	GNGT2	ABI3	ZNF652	NXPH3	SPOP	SLC35B1	KAT7	TAC4	ITGA3	PDK2	SAMD14	SGCA	COL1A1	XYLT2	EME1	MYCBPAP	SPATA20	CACNA1G
ABCC3	LUC7L3	SPAG9	CA10	KIF2B	TOM1L1	STXBP4	HLF	ANKFN1	NOG	TRIM25	COIL	SCPEP1	AKAP1	CCDC182	VEZF1	OR4D1	EPX	MKS1	LPO
MPO	TSPOAP1	SUPT4H1	HSF5	MTMR4	SEPTIN4	TEX14	PPM1E	TRIM37	PRR11	SMG8	CLTC	PTRH2	TUBD1	HEATR6	USP32	CHCT1	PPM1D	BCAS3	TBX4
NACA2	BRIP1	INTS2	MED13	TLK2	MRC2	MARCHF10	TANC2	ACE	TACO1	LIMD2	STRADA	CCDC47	DDX42	SMARCD2	CSH2	GH2	CSH1	CSHL1	CD79B
SCN4A	PRR29	ERN1	TEX2	POLG2	DDX5	CEP95	LRRC37A3	RGS9	CEP112	CACNG4	HELZ	PSMD12	PITPNC1	BPTF	AMZ2	ARSG	PRKAR1A	ABCA8	ABCA9
ABCA6	ABCA10	ABCA5	MAP2K6	KCNJ16	SSTR2	COG1	SDK2	RPL38	DNAI2	KIF19	GPR142	GPRC5C	CD300LB	CD300C	RAB37	GRIN2C	FDXR	FADS6	OTOP2
OTOP3	HID1	CDR2L	MRPL58	KCTD2	SLC16A5	NT5C	SUMO2	GGA3	SLC25A19	CASKIN2	TSEN54	LLGL2	RECQL5	SAP30BP	UNC13D	MRPL38	ACOX1	EVPL	ZACN
EXOC7	QRICH2	UBE2O	SEC14L1	SEPTIN9	TNRC6C	TMC8	BIRC5	PGS1	DNAH17	CYTH1	USP36	TIMP2	C1QTNF1	ENGASE	RBFOX3	TBC1D16	CCDC40	GAA	SLC26A11
RNF213	RPTOR	CHMP6	BAIAP2	AATK	CEP131	SLC38A10	FSCN2	FAAP100	NPLOC4	ARL16	HGS	P4HB	ANAPC11	PCYT2	PYCR1	ASPSCR1	CENPX	RAC3	GPS1
DUS1L	FASN	CCDC57	SLC16A3	UTS2R	OGFOD3	CYBC1	FOXK2	FN3KRP	TBCD	B3GNTL1	USP14	COLEC12	CETN1	CLUL1	ENOSF1	YES1	METTL4	NDC80	SMCHD1
LPIN2	MYOM1	DLGAP1	AKAIN1	ZBTB14	EPB41L3	TMEM200C	L3MBTL4	ARHGAP28	LAMA1	LRRC30	PTPRM	MTCL1	ANKRD12	RALBP1	PPP4R1	TXNDC2	VAPA	APCDD1	PIEZO2
GNAL	MPPE1	IMPA2	ANKRD62	CIDEA	TUBB6	AFG3L2	SPIRE1	CEP76	PTPN2	CEP192	LDLRAD4	FAM210A	RNMT	MC5R	MC2R	ZNF519	POTEC	ANKRD30B	ROCK1
GREB1L	ESCO1	ABHD3	MIB1	GATA6	CTAGE1	RBBP8	RIOK3	RMC1	NPC1	LAMA3	TTC39C	CABYR	OSBPL1A	HRH4	ZNF521	SS18	PSMA8	TAF4B	KCTD1
AQP4	DSC3	DSC2	DSC1	DSG1	DSG3	DSG2	TTR	B4GALT6	SLC25A52	TRAPPC8	MEP1B	GAREM1	KLHL14	CCDC178	ASXL3	DTNA	ZNF397	ZNF24	RPRD1A
ELP2	FHOD3	TPGS2	KIAA1328	CELF4	PIK3C3	RIT2	SYT4	SETBP1	SLC14A1	SIGLEC15	EPG5	PSTPIP2	HAUS1	C18orf25	LOXHD1	PIAS2	ELOA2	KATNAL2	HDHD2
SKOR2	CTIF	ACAA2	MYO5B	MBD1	CXXC1	SKA1	MAPK4	ME2	ELAC1	SMAD4	DCC	POLI	STARD6	C18orf54	DYNAP	CCDC68	TCF4	WDR7	BOD1L2
ST8SIA3	ONECUT2	FECH	NARS1	ATP8B1	NEDD4L	ALPK2	MALT1	ZNF532	RAX	CPLX4	LMAN1	CCBE1	MC4R	CDH20	PIGN	RELCH	ZCCHC2	PHLPP1	BCL2
SERPINB12	SERPINB13	SERPINB4	SERPINB3	SERPINB2	SERPINB10	HMSD	SERPINB8	CDH7	CDH19	DSEL	TMX3	CCDC102B	CD226	RTTN	CBLN2	NETO1	FBXO15	C18orf63	DIPK1C
CNDP2	CNDP1	ZNF407	TSHZ1	ZNF516	ZNF236	GALR1	SALL3	ATP9B	NFATC1	CTDP1	KCNG2	ADNP2	PARD6G	PLPP2	MIER2	THEG	C2CD4C	SHC2	CDC34
FGF22	RNF126	PALM	PTBP1	PRTN3	MED16	GRIN3B	SBNO2	STK11	CBARP	CIRBP	PWWP3A	DAZAP1	RPS15	APC2	PCSK4	REEP6	ADAMTSL5	MEX3D	TCF3
ONECUT3	REXO1	ABHD17A	ADAT3	SCAMP4	CSNK1G2	AP3D1	DOT1L	SF3A2	AMH	JSRP1	TMPRSS9	LMNB2	GADD45B	THOP1	ZNF555	ZNF556	ZNF57	TLE6	TLE2
GNA15	NCLN	CELF5	FZR1	TEKTIP1	GIPC3	CACTIN	PIP5K1C	TJP3	MATK	ZFR2	ATCAY	DAPK3	EEF2	ZBTB7A	ANKRD24	TMIGD2	FSD1	STAP2	CHAF1A
UBXN6	TNFAIP8L1	DPP9	TICAM1	KDM4B	PTPRS	ZNRF4	SAFB2	SAFB	RPL36	LONP1	CATSPERD	DUS3L	FUT6	FUT3	RFX2	MLLT1	ACER1	ALKBH7	GTF2F1
SLC25A23	CRB3	DENND1C	TUBB4A	TNFSF9	C3	TRIP10	SH2D3A	VAV1	ADGRE1	MBD3L3	ZNF557	INSR	ARHGEF18	ZNF358	MCOLN1	PNPLA6	CAMSAP3	XAB2	STXBP2
MCEMP1	FCER2	CLEC4M	EVI5L	LRRC8E	MAP2K7	SNAPC2	ELAVL1	FBN3	KANK3	RAB11B	HNRNPM	PRAM1	MYO1F	ADAMTS10	ACTL9	OR2Z1	MUC16	OR1M1	OR7G2
ZNF317	OR7D4	OR7E24	ZNF699	ZNF559	ZNF177	ZNF266	ZNF560	ZNF426	ZNF121	ZNF562	ZNF846	FBXL12	OLFM2	COL5A3	PPAN	DNMT1	ICAM4	ICAM5	FDX2
RAVER1	ICAM3	TYK2	PDE4A	KEAP1	ATG4D	KRI1	AP1M2	ILF3	DNM2	C19orf38	CARM1	SMARCA4	LDLR	KANK2	DOCK6	CCDC159	RGL3	ODAD3	PRKCSH
ACP5	ZNF627	ZNF823	ZNF441	ZNF491	ZNF440	ZNF439	ZNF700	ZNF763	ZNF20	ZNF136	ZNF44	ZNF563	ZNF442	ZNF799	ZNF564	ZNF490	ZNF791	MAN2B1	DHPS
FBXW9	TNPO2	BEST2	HOOK2	DNASE2	GCDH	FARSA	RAD23A	DAND5	NFIX	LYL1	NACC1	STX10	CACNA1A	ZSWIM4	CC2D1A	DCAF15	RFX1	RLN3	PALM3
MISP3	SAMD1	PRKACA	ASF1B	ADGRL1	PKN1	TECR	CLEC17A	ADGRE3	ZNF333	ADGRE2	OR7C1	OR7A10	SLC1A6	CCDC105	SYDE1	ILVBL	NOTCH3	EPHX3	BRD4
AKAP8	AKAP8L	WIZ	RASAL3	PGLYRP2	CYP4F3	CYP4F12	OR10H2	OR10H5	OR10H1	CYP4F2	OR10H4	AP1M1	KLF2	EPS15L1	CALR3	SLC35E1	NWD1	SIN3B	F2RL3
CPAMD8	HAUS8	MYO9B	ANKLE1	DDA1	ANO8	PLVAP	BST2	TMEM221	NXNL1	SLC27A1	PGLS	NIBAN3	UNC13A	MAP1S	FCHO1	JAK3	CCDC124	KCNN1	IL12RB1
MAST3	MPV17L2	IQCN	PGPEP1	GDF15	SSBP4	ELL	TMEM59L	KLHL26	CRTC1	HOMER3	SUGP2	TMEM161A	NR2C2AP	NCAN	HAPLN4	MAU2	GATAD2A	TSSK6	CILP2
LPAR2	GMIP	ZNF14	ZNF253	ZNF93	ZNF682	ZNF90	ZNF486	ZNF737	ZNF626	ZNF85	ZNF430	ZNF431	ZNF708	ZNF493	ZNF429	ZNF100	ZNF43	ZNF208	ZNF257
ZNF676	ZNF729	ZNF98	ZNF492	ZNF99	ZNF728	ZNF730	ZNF91	ZNF675	ZNF681	ZNF726	ZNF254	VSTM2B	POP4	PLEKHF1	URI1	ZNF536	TSHZ3	ZNF507	DPY19L3
ANKRD27	TDRD12	SLC7A9	CEP89	RHPN2	WDR88	LRP3	SLC7A10	CEBPA	PEPD	LSM14A	GARRE1	GPI	UBA2	WTIP	ZNF181	ZNF599	ZNF792	GRAMD1A	SCN1B
LGI4	FXYD1	FXYD5	FAM187B	LSR	USF2	MAG	CD22	FFAR3	FFAR2	KRTDAP	DMKN	SBSN	ATP4A	HAUS5	ZBTB32	KMT2B	IGFLR1	PROSER3	ARHGAP33
PRODH2	NPHS1	NFKBID	SDHAF1	SYNE4	CLIP3	WDR62	ZNF565	ZNF146	ZFP14	ZFP82	ZNF566	ZNF529	ZNF382	ZNF461	ZNF567	ZNF850	ZNF790	ZNF345	ZNF829
ZNF420	ZNF585B	ZNF383	ZNF875	ZNF527	ZNF569	ZNF570	ZNF793	ZNF540	ZFP30	ZNF573	WDR87	SIPA1L3	DPF1	YIF1B	CATSPERG	PSMD8	GGN	FAM98C	RASGRP4
RYR1	MAP4K1	ACTN4	LGALS4	ECH1	HNRNPL	RINL	NFKBIB	FBXO27	PAK4	IFNL2	LRFN1	GMFG	PAF1	ZFP36	PLEKHG2	SUPT5H	TIMM50	DLL3	LGALS14
CLC	DYRK1B	FCGBP	ZNF546	ZNF780B	ZNF780A	MAP3K10	PLD3	PRX	SPTBN4	SHKBP1	NUMBL	COQ8B	SNRPA	EGLN2	CYP2F1	CYP2S1	AXL	HNRNPUL1	CCDC97
TGFB1	B3GNT8	ERICH4	CEACAM7	CEACAM5	ARHGEF1	ATP1A3	GRIK5	POU2F2	ERF	CIC	PRR19	TMEM145	MEGF8	LIPE	CEACAM1	PSG3	PSG6	PSG11	PSG2
PSG5	PSG4	PSG9	LYPD3	ZNF576	SRRM5	CADM4	PLAUR	SMG9	KCNN4	ZNF283	ZNF404	ZNF45	ZNF221	ZNF155	ZNF230	ZNF284	ZNF224	ZNF225	ZNF234
ZNF226	ZNF227	ZNF235	ZNF112	ZNF229	ZNF180	CEACAM20	PVR	CEACAM16	BCL3	CBLC	BCAM	NECTIN2	APOE	CLPTM1	ZNF296	MARK4	ERCC2	POLR1G	ERCC1
OPA3	EML2	GIPR	SIX5	DMPK	DMWD	RSPH6A	NANOS2	NOVA2	CCDC61	PGLYRP1	IGFL3	HIF3A	PPP5C	CCDC8	PNMA8B	PTGIR	PRKD2	FKRP	SLC1A5
ARHGAP35	ZC3H4	SAE1	CCDC9	C5AR2	DHX34	SLC8A2	ZNF541	BICRA	EHD2	NOP53	BSPH1	ELSPBP1	LIG1	ZSWIM9	ZNF114	TMEM143	KDELR1	GRIN2D	KCNJ14
LMTK3	SPHK2	FUT2	RASIP1	IZUMO1	FUT1	FGF21	HSD17B14	PLEKHA4	TULP2	NUCB1	DHDH	BAX	GYS1	CGB2	PPFIA3	HRC	SLC6A16	TEAD2	KASH5
PTH2	GFY	ALDH16A1	RPL13A	RCN3	NOSIP	PRR12	SCAF1	IRF3	BCL2L12	PRMT1	CPT1C	TSKS	AP2A1	MED25	TBC1D17	IL4I1	SIGLEC11	VRK3	ZNF473
IZUMO2	MYH14	KCNC3	NR1H2	POLD1	MYBPC2	GARIN5A	JOSD2	LRRC4B	SYT3	SHANK1	GPR32	KLK1	KLK3	KLK2	KLK4	KLK7	KLK8	KLK10	KLK12
KLK13	SIGLEC9	SIGLEC7	CD33	SIGLECL1	VSIG10L	LIM2	C19orf84	SIGLEC8	CEACAM18	SIGLEC12	ZNF175	SIGLEC5	HAS1	FPR1	FPR2	ZNF577	ZNF649	ZNF350	ZNF615
ZNF614	ZNF432	ZNF841	ZNF616	ZNF836	PPP2R1A	ZNF766	ZNF480	ZNF610	ZNF880	ZNF528	ZNF534	ZNF578	ZNF808	ZNF701	ZNF83	ZNF611	ZNF600	ZNF28	ZNF160
ZNF415	ZNF347	ZNF665	ZNF677	VN1R2	ZNF845	ZNF765	ZNF813	ZNF331	DPRX	NLRP12	MYADM	PRKCG	CACNG8	VSTM1	PRPF31	LENG1	RPS9	LILRB5	LILRB2
LILRA4	LAIR1	TTYH1	LENG8	CDC42EP5	LILRA2	LILRA1	LILRB1	KIR2DL1	KIR3DL2	NCR1	NLRP7	NLRP2	GP6	PPP1R12C	TNNT1	DNAAF3	PTPRH	PPP6R1	BRSK1
TMEM150B	GARIN5B	RPL28	SHISA7	ISOC2	ZNF628	NAT14	SSC5D	SBK2	ZNF579	FIZ1	ZNF865	ZNF580	EPN1	NLRP9	RFPL4A	NLRP11	NLRP4	NLRP13	NLRP8
NLRP5	ZNF582	ZNF583	ZNF667	ZNF471	ZFP28	ZNF470	ZNF71	SMIM17	ZNF835	ZIM2	USP29	ZIM3	DUXA	ZNF264	AURKC	ZNF805	ZNF460	ZNF543	ZNF304
ZNF548	ZNF749	ZNF419	ZNF549	ZIK1	ZNF134	ZNF211	ZSCAN4	ZNF551	ZNF154	ZNF776	ZNF586	ZNF814	ZNF418	ZNF256	ZNF606	ZSCAN1	ZNF135	ZSCAN18	ZNF329
ZNF544	ZSCAN22	A1BG	ZNF132	ZNF324B	SLC27A5	ZBTB45	TRIM28	MZF1	SH3YL1	TMEM18	SNTG2	TPO	PXDN	MYT1L	EIPR1	ADI1	DCDC2C	SOX11	CMPK2
RSAD2	KIDINS220	MBOAT2	ASAP2	ITGB1BP1	CPSF3	IAH1	ADAM17	GRHL1	KLF11	RRM2	ODC1	NOL10	ATP6V1C2	ROCK2	GREB1	NTSR2	LPIN1	TRIB2	NBAS
DDX1	MYCN	RAD51AP2	SMC6	NT5C1B	WDR35	MATN3	LAPTM4A	PUM2	GDF7	APOB	TDRD15	KLHL29	ATAD2B	UBXN2A	MFSD2B	WDCP	FAM228A	ITSN2	NCOA1
ADCY3	DNAJC27	EFR3B	DNMT3A	ASXL2	KIF3C	GAREM2	HADHA	HADHB	ADGRF3	OTOF	KCNK3	SLC35F6	CENPA	DPYSL5	MAPRE3	TMEM214	AGBL5	CGREF1	PREB
SLC5A6	CAD	SLC30A3	DNAJC5G	TRIM54	GTF3C2	EIF2B4	ZNF513	KRTCAP3	IFT172	FNDC4	GCKR	C2orf16	CCDC121	GPN1	SLC4A1AP	MRPL33	FOSL2	PLB1	PPP1CB
SPDYA	TOGARAM2	PCARE	CLIP4	ALK	LCLAT1	CAPN13	GALNT14	CAPN14	EHD3	DPY30	NLRC4	YIPF4	BIRC6	LTBP1	RASGRP3	FAM98A	CRIM1	VIT	STRN
HEATR5B	EIF2AK2	SULT6B1	CEBPZOS	CEBPZ	NDUFAF7	PRKD3	QPCT	CDC42EP3	RMDN2	CYP1B1	ATL2	HNRNPLL	SRSF7	DHX57	MORN2	ARHGEF33	SOS1	CDKL4	MAP4K3
SLC8A1	EML4	HAAO	THADA	C1GALT1C1L	PLEKHH2	ABCG5	ABCG8	LRPPRC	SLC3A1	CAMKMT	SIX3	SIX2	SRBD1	PRKCE	EPAS1	TMEM247	SOCS5	TTC7A	STPG4
MSH2	KCNK12	MSH6	FBXO11	FOXN2	PPP1R21	STON1	LHCGR	FSHR	NRXN1	ASB3	ERLEC1	GPR75	PSME4	TSPYL6	C2orf73	SPTBN1	EML6	RTN4	CLHC1
RPS27A	MTIF2	CCDC88A	PPP4R3B	EFEMP1	BCL11A	PAPOLG	REL	PUS10	PEX13	SANBR	USP34	XPO1	FAM161A	CCT4	EHBP1	WDPCP	UGP2	VPS54	PELI1
LGALSL	AFTPH	CEP68	ACTR2	SPRED2	MEIS1	ETAA1	DNAAF10	CNRIP1	PLEK	APLF	PROKR1	ARHGAP25	ANTXR1	GFPT1	NFU1	AAK1	ANXA4	GMCL1	SNRNP27
MXD1	ASPRV1	C2orf42	TIA1	PCYOX1	ADD2	CLEC4F	CD207	VAX2	ANKRD53	MCEE	MPHOSPH10	PAIP2B	ZNF638	DYSF	CYP26B1	EXOC6B	SFXN5	SMYD5	PRADC1
CCT7	FBXO41	EGR4	ALMS1	NAT8	DUSP11	C2orf78	STAMBP	ACTG2	DGUOK	TET3	MTHFD2	DCTN1	INO80B	CCDC142	TTC31	LBX2	TLX2	DQX1	HTRA2
LOXL3	DOK1	SEMA4F	HK2	POLE4	TACR1	MRPL19	GCFC2	LRRTM4	REG3G	CTNNA2	LRRTM1	DNAH6	TCF7L1	TGOLN2	ELMOD3	MAT2A	RNF181	TMEM150A	USP39
ST3GAL5	POLR1A	PTCD3	IMMT	MRPL35	REEP1	KDM3A	RNF103	CD8A	CD8B	RGPD1	RGPD2	SMYD1	FABP1	THNSL2	EIF2AK3	RPIA	MRPS5	ZNF2	FAHD2A
TRIM43	ANKRD36C	GPAT2	SNRNP200	ITPRIPL1	NCAPH	ARID5A	FER1L5	CNNM4	CNNM3	ANKRD23	SEMA4C	ANKRD36	ANKRD36B	ZAP70	TMEM131	VWA3B	CNGA3	INPP4A	MGAT4A
CRACDL	TSGA10	LIPT1	LYG2	EIF5B	REV1	AFF3	LONRF2	RPL31	TBC1D8	CNOT11	CREG2	MAP4K4	IL1R2	IL1RL2	IL1RL1	IL18R1	IL18RAP	SLC9A4	SLC9A2
MFSD9	TMEM182	MRPS9	GPR45	TGFBRAP1	C2orf49	NCK2	UXS1	RGPD3	ST6GAL2	RGPD4	SLC5A7	SULT1C3	SULT1C2	SULT1C4	GCC2	RANBP2	CCDC138	SH3RF3	NPHP1
ACOXL	BCL2L11	ANAPC1	MERTK	FBLN7	ZC3H8	ZC3H6	TTL	POLR1B	NT5DC4	CKAP2L	IL1B	IL37	PAX8	FOXD4L1	SLC35F5	ACTR3	DPP10	DDX18	CCDC93
EN1	MARCO	TMEM37	SCTR	CFAP221	PTPN4	EPB41L5	TMEM185B	GLI2	TFCP2L1	CLASP1	TSN	CNTNAP5	BIN1	CYP27C1	MAP3K2	PROC	IWS1	MYO7B	GPR17
LIMS2	WDR33	POLR2D	AMMECR1L	SAP130	UGGT1	RAB6C	TUBA3E	POTEI	GPR148	AMER3	ARHGEF4	FAM168B	PLEKHB2	MZT2A	LYPD1	NCKAP5	MGAT5	CCNT2	MAP3K19
RAB3GAP1	ZRANB3	R3HDM1	UBXN4	LCT	MCM6	THSD7B	NXPH2	LRP1B	KYNU	ARHGAP15	GTDC1	ZEB2	ACVR2A	MBD5	KIF5C	RND3	RBM43	TNFAIP6	RIF1
NEB	ARL5A	STAM2	FMNL2	PRPF40A	GALNT13	KCNJ3	NR4A2	GALNT5	ERMN	CYTIP	ACVR1C	ACVR1	CCDC148	PKP4	DAPL1	TANC1	WDSUB1	BAZ2B	PLA2R1
ITGB6	TANK	SLC4A10	DPP4	FAP	IFIH1	KCNH7	FIGN	GRB14	COBLL1	SLC38A11	SCN3A	SCN2A	CSRNP3	GALNT3	TTC21B	SCN1A	SCN9A	SCN7A	XIRP2
B3GALT1	STK39	CERS6	NOSTRIN	G6PC2	ABCB11	DHRS9	LRP2	BBS5	FASTKD1	PPIG	CFAP210	PHOSPHO2	SSB	UBR3	MYO3B	SP5	GORASP2	TLK1	DYNC1I2
SLC25A12	HAT1	METAP1D	DLX1	DLX2	ITGA6	PDK1	RAPGEF4	SP3	OLA1	CIR1	SCRN3	GPR155	ATF2	ATP5MC3	LNPK	EVX2	HOXD13	HOXD12	HOXD11
HOXD9	HOXD4	HOXD1	HNRNPA3	NFE2L2	AGPS	TTC30B	TTC30A	PDE11A	RBM45	OSBPL6	PJVK	PLEKHA3	TTN	CCDC141	ZNF385B	CWC22	ITGA4	CERKL	NEUROD1
ITPRID2	PPP1R1C	PDE1A	DNAJC10	NCKAP1	DUSP19	NUP35	ZNF804A	FSIP2	ITGAV	FAM171B	ZSWIM2	CALCRL	GULP1	COL3A1	COL5A2	WDR75	SLC40A1	ASNSD1	ANKAR
PMS1	MSTN	HIBCH	INPP1	MFSD6	NEMP2	NAB1	STAT1	STAT4	MYO1B	TMEFF2	SLC39A10	DNAH7	STK17B	HECW2	CCDC150	GTF3C3	PGAP1	ANKRD44	SF3B1
COQ10B	HSPD1	RFTN2	MARS2	BOLL	PLCL1	SATB2	C2orf69	MAIP1	KCTD18	SGO2	AOX1	CLK1	PPIL3	ORC2	HYCC2	CFLAR	CASP10	CASP8	STRADB
C2CD6	TMEM237	MPP4	ALS2	CDK15	FZD7	KIAA2012	BMPR2	FAM117B	ICA1L	WDR12	NBEAL1	ABI2	CD28	PARD3B	NRP2	INO80D	NDUFS1	EEF1B2	CMKLR2
ZDBF2	ADAM23	DYTN	MDH1B	FASTKD2	KLF7	METTL21A	CCNYL1	PLEKHM3	CRYGD	IDH1	PIKFYVE	PTH2R	MAP2	UNC80	RPE	MYL1	LANCL1	CPS1	ERBB4
IKZF2	SPAG16	BARD1	ABCA12	FN1	MREG	XRCC5	SMARCAL1	IGFBP2	TNS1	RUFY4	CXCR2	CXCR1	AAMP	PNKD	CATIP	SLC11A1	PLCD4	ZNF142	BCS1L
RNF25	STK36	TTLL4	WNT6	CFAP65	IHH	SLC23A3	ATG9A	ANKZF1	TUBA4A	PTPRN	RESP18	DES	SPEG	ASIC4	CHPF	TMEM198	OBSL1	STK11IP	SLC4A3
EPHA4	PAX3	FARSB	MOGAT1	SCG2	MRPL44	FAM124B	CUL3	DOCK10	NYAP2	IRS1	RHBDD1	COL4A4	COL4A3	MFF	TM4SF20	AGFG1	SLC19A3	CCL20	DAW1
SPHKAP	PID1	DNER	TRIP12	FBXO36	SLC16A14	SP110	SP140L	SP100	CAB39	GPR55	PSMD1	HTR2B	ARMC9	B3GNT7	NCL	NMUR1	TEX44	PDE6D	COPS7B
DIS3L2	ALPP	ALPI	ECEL1	PRSS56	CHRNG	TIGD1	GIGYF2	KCNJ13	NGEF	NEU2	ATG16L1	DGKD	USP40	UGT1A8	UGT1A5	UGT1A1	MROH2A	HJURP	TRPM8
SPP2	SH3BP4	AGAP1	ASB18	IQCA1	ACKR3	COPS8	COL6A3	MLPH	LRRFIP1	RBM44	ESPNL	ERFE	ILKAP	PER2	TRAF3IP1	TWIST2	HDAC4	OR6B3	GPC1
ANKMY1	RNPEPL1	CAPN10	KIF1A	MAB21L4	CROCC2	SNED1	MTERF4	PASK	PPP1R7	ANO7	HDLBP	FARP2	ATG4B	ING5	D2HGDH	NEU4	RTP5	DEFB125	DEFB128
TRIB3	CSNK2A1	SLC52A3	PSMF1	RAD21L1	SNPH	SDCBP2	NSFL1C	SIRPB2	SIRPG	SIRPA	PDYN	STK35	TGM3	TGM6	TMC2	NOP56	IDH3B	CPXM1	PCED1A
PTPRA	GNRH2	MRPS26	UBOX5	LZTS3	SLC4A11	DNAAF9	ATRN	SIGLEC1	SPEF1	CENPB	CDC25B	RNF24	SMOX	ADRA1D	SLC23A2	CDS2	CHGB	TRMT6	MCM8
LRRN4	FERMT1	BMP2	PLCB1	PLCB4	PAK5	ANKEF1	SNAP25	SLX4IP	JAG1	BTBD3	SPTLC3	ISM1	ESF1	NDUFAF5	SEL1L2	FLRT3	KIF16B	PCSK2	DSTN
RRBP1	SNX5	OVOL2	KAT14	ZNF133	POLR3F	SEC23B	SCP2D1	SLC24A3	NAA20	CRNKL1	CFAP61	RALGAPA2	XRN2	PAX1	SSTR4	CD93	NXT1	NAPB	CSTL1
CST1	CST2	GGTLC1	SYNDIG1	ACSS1	ENTPD6	PYGB	NINL	NANP	ZNF337	HM13	TPX2	CCM2L	HCK	TM9SF4	PLAGL2	KIF3B	ASXL1	DNMT3B	MAPRE1
EFCAB8	BPIFB6	BPIFB3	BPIFA3	BPIFB1	CDK5RAP1	SNTA1	E2F1	PXMP4	ZNF341	RALY	ITCH	DYNLRB1	NCOA6	ACSS2	MYH7B	TRPC4AP	EDEM2	MMP24OS	FAM83C
UQCC1	CEP250	ERGIC3	CPNE1	ROMO1	RBM39	PHF20	EPB41L1	AAR2	DLGAP4	NDRG3	DSN1	SOGA1	TLDC2	SAMHD1	RBL1	CTNNBL1	VSTM2L	TTI1	KIAA1755
BPI	LBP	RALGAPB	ARHGAP40	ACTR5	PPP1R16B	DHX35	TOP1	PLCG1	ZHX3	EMILIN3	CHD6	PTPRT	SRSF6	MYBL2	TOX2	JPH2	GDAP1L1	HNF4A	TTPAL
SERINC3	KCNK15	YWHAB	KCNS1	WFDC5	PI3	SEMG1	SEMG2	SLPI	MATN4	SDC4	PIGT	WFDC10B	WFDC3	SNX21	ZSWIM1	PCIF1	SLC12A5	NCOA5	CD40
CDH22	SLC35C2	ELMO2	ZNF334	OCSTAMP	SLC13A3	TP53RK	SLC2A10	ZMYND8	NCOA3	SULF2	PREX1	ARFGEF2	CSE1L	STAU1	DDX27	ZNFX1	KCNB1	B4GALT5	SLC9A8
SNAI1	PTPN1	RIPOR3	PARD6B	ADNP	DPM1	MOCS3	ATP9A	SALL4	ZNF217	BCAS1	CYP24A1	DOK5	CBLN4	MC3R	CSTF1	CASS4	GCNT7	BMP7	SPO11
CTCFL	PCK1	RAB22A	APCDD1L	STX16	GNAS	TUBB1	ZNF831	PHACTR3	SYCP2	PPP1R3D	FAM217B	CDH26	CDH4	TAF4	LSM14B	PSMA7	MTG2	HRH3	ADRM1
LAMA5	CABLES2	RBBP8NL	OGFR	DIDO1	SLC17A9	YTHDF1	BIRC7	COL20A1	CHRNA4	KCNQ2	EEF1A2	PTK6	SRMS	FNDC11	HELZ2	RTEL1	ZGPAT	ZBTB46	ABHD16B
UCKL1	ZNF512B	PRPF6	SOX18	TCEA2	RGS19	OPRL1	NPBWR2	MYT1	TPTE	LIPI	HSPA13	SAMSN1	NRIP1	USP25	BTG3	C21orf91	CHODL	TMPRSS15	NCAM2
MRPL39	GABPA	CYYR1	ADAMTS1	ADAMTS5	N6AMT1	LTN1	RWDD2B	USP16	CCT8	MAP3K7CL	BACH1	GRIK1	TIAM1	SOD1	SCAF4	HUNK	URB1	CFAP298	SYNJ1
OLIG2	IFNAR2	IL10RB	IFNAR1	DNAJC28	SON	DONSON	ATP5PO	MRPS6	C21orf140	CLIC6	RUNX1	SETD4	CBR3	DOP1B	MORC3	SIM2	HLCS	PIGP	TTC3
DYRK1A	KCNJ6	ETS2	BRWD1	LCA5L	B3GALT5	IGSF5	DSCAM	MX2	PRDM15	ZBTB21	UMODL1	ABCG1	TFF1	TMPRSS3	UBASH3A	RSPH1	SLC37A1	PDE9A	WDR4
NDUFV3	PKNOX1	CBS	SIK1	HSF2BP	RRP1	PWP2	GATD3	AIRE	PFKL	TRPM2	UBE2G2	ITGB2	ADARB1	POFUT2	COL18A1	SLC19A1	COL6A1	COL6A2	FTCD
SPATC1L	MCM3AP	PCNT	DIP2A	OR11H1	XKR3	GAB4	IL17RA	TMEM121B	ADA2	CECR2	SLC25A18	ATP6V1E1	BCL2L13	MICAL3	DGCR6	DGCR2	ESS2	CLTCL1	HIRA
UFD1	SEPTIN5	TBX1	TXNRD2	ARVCF	ZDHHC8	CCDC188	RTN4R	RIMBP3	KLHL22	MED15	PI4KA	AIFM3	LZTR1	LRRC74B	HIC2	CCDC116	YPEL1	ZNF280A	PRAME
GGTLC2	RSPH14	RAB36	BCR	DRICH1	C22orf15	SMARCB1	DERL3	SLC2A11	GSTT1	CABIN1	SUSD2	ADORA2A	PIWIL3	SGSM1	KIAA1671	GRK3	MYO18B	SEZ6L	HPS4
SRRD	TPST2	CRYBB1	MN1	TTC28	CHEK2	HSCB	ZNRF3	EMID1	RHBDD3	EWSR1	AP1B1	RFPL1	NEFH	THOC5	NF2	CABP7	ZMAT5	MTMR3	SF3A1
RNF215	MTFP1	SEC14L3	SEC14L4	GAL3ST1	PES1	SLC35E4	OSBP2	MORC2	SMTN	INPP5J	LIMK2	PIK3IP1	PATZ1	DRG1	SFI1	PRR14L	DEPDC5	YWHAH	SLC5A1
C22orf42	RFPL2	RFPL3	BPIFC	FBXO7	SYN3	LARGE1	HMGXB4	RASD2	APOL6	APOL5	RBFOX2	APOL3	MYH9	EIF3D	CACNG2	CSF2RB	TEX33	TST	MPST
TMPRSS6	SSTR3	CARD10	GGA1	SH3BP1	TRIOBP	GCAT	GALR3	EIF3L	MICALL1	C22orf23	SOX10	PICK1	PLA2G6	TMEM184B	KDELR3	DDX17	DMC1	CBY1	TOMM22
GTPBP1	SUN2	APOBEC3A	APOBEC3C	APOBEC3G	APOBEC3H	TAB1	MGAT3	MIEF1	CACNA1I	ENTHD1	GRAP2	FAM83F	TNRC6B	SGSM3	MRTFA	XPNPEP3	EP300	L3MBTL2	RANGAP1
ZC3H7B	CSDC2	XRCC6	MEI1	CCDC134	SREBF2	SEPTIN3	WBP2NL	PHETA2	TCF20	NFAM1	SERHL2	POLDIP3	CYB5R3	ARFGAP3	TTLL1	MCAT	TTLL12	SCUBE1	EFCAB6
PNPLA5	PNPLA3	SAMM50	SHISAL1	RTL6	PHF21B	KIAA0930	SMC1B	WNT7B	PPARA	PKDREJ	TTC38	GTSE1	CELSR1	GRAMD4	CERK	TAFA5	BRD1	ZBED4	CRELD2
IL17REL	TTLL8	MOV10L1	TRABD	TUBGCP6	PLXNB2	PPP6R2	SBF1	MIOX	SCO2	ODF3B	KLHDC7B	SHANK3	ACR	CHL1	CNTN6	CNTN4	TRNT1	CRBN	LRRN1
SETMAR	ITPR1	BHLHE40	EDEM1	GRM7	LMCD1	OXTR	RAD18	SRGAP3	SETD5	MTMR14	BRPF1	CAMK1	OGG1	ARPC4	TTLL3	IL17RE	IL17RC	PRRT3	FANCD2
IRAK2	TATDN2	GHRL	ATP2B2	SLC6A11	SLC6A1	HRH1	TIMP4	PPARG	MKRN2	TMEM40	CAND2	IQSEC1	NUP210	HDAC11	FBLN2	WNT7A	CHCHD4	XPC	LSM3
SLC6A6	CCDC174	C3orf20	FGD5	NR2C2	CAPN7	SH3BP5	METTL6	EAF1	COLQ	HACL1	BTD	ANKRD28	GALNT15	OXNAD1	RFTN1	DAZL	PLCL2	TBC1D5	SATB1
KCNH8	EFHB	PP2D1	KAT2B	SGO1	NR1D2	THRB	TOP2B	NGLY1	OXSM	LRRC3B	NEK10	SLC4A7	EOMES	AZI2	RBMS3	TGFBR2	GADL1	STT3B	OSBPL10
ZNF860	GPD1L	CMTM7	CNOT10	TRIM71	TMPPE	CRTAP	SUSD5	FBXL2	UBP1	CLASP2	PDCD6IP	ARPP21	DCLK3	TRANK1	EPM2AIP1	MLH1	LRRFIP2	GOLGA4	ITGA9
CTDSPL	VILL	DLEC1	OXSR1	SLC22A13	XYLB	ACVR2B	EXOG	SCN5A	SCN10A	SCN11A	GORASP1	TTC21A	CSRNP1	XIRP1	CCR8	SLC25A38	MOBP	MYRIP	ENTPD3
ZNF619	ZNF620	ZNF621	CTNNB1	ULK4	TRAK1	LYZL4	VIPR1	SEC22C	NKTR	ZBTB47	KLHL40	HHATL	CCDC13	CYP8B1	ZNF662	KRBOX1	GASK1A	POMGNT2	ANO10
TOPAZ1	TCAIM	ZNF445	ZNF852	ZKSCAN7	ZNF660	ZNF197	ZNF502	ZNF501	KIAA1143	KIF15	TGM4	EXOSC7	CDCP1	TMEM158	LARS2	LIMD1	SACM1L	CCR9	CXCR6
FYCO1	XCR1	CCR1	CCR2	CCR5	CCRL2	LTF	LRRC2	FAM240A	ALS2CL	PRSS50	NBEAL2	SETD2	KIF9	SCAP	ELP6	CSPG5	SMARCC1	DHX30	MAP4
ZNF589	FBXW12	PLXNB1	ATRIP	PFKFB4	COL7A1	UQCRC1	SLC26A6	CELSR3	P4HTM	WDR6	IMPDH2	QARS1	USP19	LAMB2	KLHDC8B	IHO1	C3orf62	USP4	DAG1
BSN	APEH	MST1	RNF123	AMIGO3	GMPPB	IP6K1	CDHR4	INKA1	UBA7	TRAIP	MST1R	RBM6	RBM5	SEMA3F	SLC38A3	GNAI2	HYAL3	NAA80	HYAL2
CACNA2D2	HEMK1	MAPKAPK3	DOCK3	RBM15B	DCAF1	RAD54L2	TEX264	GRM2	IQCF1	RRP9	POC1A	ALAS1	TLR9	PPM1M	DNAH1	BAP1	PHF7	NISCH	NT5DC2
PBRM1	GLT8D1	NEK4	ITIH1	ITIH3	ITIH4	SFMBT1	PRKCD	DCP1A	CACNA1D	IL17RB	ACTR8	CACNA2D3	LRTM1	ERC2	CCDC66	TASOR	ARHGEF3	SPATA12	IL17RD
APPL1	ASB14	DNAH12	PDE12	ARF4	DENND6A	SLMAP	FLNB	DNASE1L3	PXK	ACOX2	CFAP20DC	PTPRG	FEZF2	CADPS	C3orf49	ATXN7	PSMD6	PRICKLE2	ADAMTS9
MAGI1	LRIG1	KBTBD8	SUCLG2	EOGT	TMF1	ARL6IP5	LMOD3	FRMD4B	MITF	FOXP1	RYBP	SHQ1	GXYLT2	CNTN3	ROBO2	ROBO1	GBE1	CADM2	VGLL3
POU1F1	CGGBP1	EPHA3	PROS1	STX19	ARL13B	NSUN3	EPHA6	ARL6	CRYBG3	RIOX2	OR5H14	OR5H15	OR5K4	OR5K3	OR5K1	OR5K2	CLDND1	GPR15	CPOX
ST3GAL6	CMSS1	TBC1D23	NIT2	TOMM70	TMEM45A	ADGRG7	TFG	ABI3BP	IMPG2	SENP7	TRMT10C	ZBTB11	CEP97	NXPE3	NFKBIZ	ZPLD1	ALCAM	CBLB	CCDC54
BBX	CD47	HHLA2	MYH15	CIP2A	DZIP3	GUCA1C	MORC1	DPPA2	DPPA4	NECTIN3	ZBED2	CD96	PLCXD2	PHLDB2	TMPRSS7	C3orf52	SLC9C1	CD200	BTLA
SLC35A5	CCDC80	CD200R1L	CD200R1	GTPBP8	BOC	CFAP44	SPICE1	SIDT1	USF3	GRAMD1C	CCDC191	QTRT2	DRD3	ZBTB20	GAP43	LSAMP	IGSF11	TEX55	B4GALT4
ARHGAP31	POGLUT1	TIMMDC1	CD80	ADPRH	PLA1A	POPDC2	NR1I2	GSK3B	LRRC58	HGD	GTF2E1	STXBP5L	POLQ	ARGFX	FBXO40	HCLS1	GOLGB1	IQCB1	SLC15A2
ILDR1	CD86	CASR	CSTA	FAM162A	WDR5B	KPNA1	DTX3L	PARP15	PARP14	SEMA5B	PDIA5	SEC22A	ADCY5	MYLK	CCDC14	KALRN	UMPS	ZNF148	SNX4
ALDH1L1	KLF15	ZXDC	CHST13	C3orf22	PLXNA1	TPRA1	MCM2	PODXL2	ABTB1	MGLL	ACAD9	CFAP92	ISY1	COPG1	MBD4	RHO	PLXND1	TMCC1	ALG1L2
COL6A5	COL6A6	PIK3R4	ATP2C1	ASTE1	NEK11	ACP3	DNAJC13	ACAD11	NPHP3	TMEM108	CDV3	TOPBP1	TF	RAB6B	SLCO2A1	AMOTL2	CEP63	KY	EPHB1
PPP2R3A	MSL2	PCCB	STAG1	SLC35G2	NCK1	SOX14	DZIP1L	A4GNT	DBR1	ARMC8	NME9	ESYT3	CEP70	FAIM	PIK3CB	COPB2	CLSTN2	TRIM42	ZBTB38
RASA2	GRK7	ATP1B3	TFDP2	XRN1	ATR	PLS1	TRPC1	PCOLCE2	PAQR9	CHST2	SLC9A9	PLOD2	PLSCR2	PLSCR1	ZIC4	ZIC1	CPA3	GYG1	HLTF
HPS3	CP	TM4SF1	WWTR1	ANKUB1	TSC22D2	SERP1	ERICH6	CLRN1	MED12L	GPR87	P2RY13	P2RY12	IGSF10	AADACL2	AADAC	SUCNR1	MBNL1	ARHGEF26	DHX36
GPR149	MME	PLCH1	GMPS	KCNAB1	TIPARP	LEKR1	CCNL1	VEPH1	MLF1	GFM1	MFSD1	IQCJ	SCHIP1	IL12A	SMC4	ARL14	NMD3	OTOL1	SI
SLITRK3	BCHE	ZBBX	SERPINI2	WDR49	GOLIM4	MECOM	MYNN	LRRC34	LRRIQ4	LRRC31	SAMD7	PHC3	PRKCI	SKIL	RPL22L1	SLC2A2	TNIK	PLD1	FNDC3B
GHSR	ECT2	SPATA16	NLGN1	NAALADL2	TBL1XR1	ZMAT3	PIK3CA	ZNF639	MFN1	GNB4	MRPL47	USP13	PEX5L	TTC14	CCDC39	FXR1	SOX2	ATP11B	DCUN1D1
MCF2L2	KLHL6	YEATS2	ABCC5	HTR3E	DVL3	ABCF3	VWA5B2	ALG3	EEF1AKMT4	PSMD2	EIF4G1	FAM131A	CLCN2	POLR2H	EPHB3	MAGEF1	VPS8	EHHADH	MAP3K13
TMEM41A	LIPH	SENP2	IGF2BP2	TRA2B	ETV5	DGKG	CRYGS	TBCCD1	DNAJB11	FETUB	HRG	KNG1	ADIPOQ	ST6GAL1	MASP1	SST	BCL6	TP63	P3H2
TMEM207	IL1RAP	GMNC	OSTN	UTS2B	CCDC50	MB21D2	ATP13A5	ATP13A4	OPA1	LRRC15	GP5	ATP13A3	TMEM44	LSG1	FAM43A	XXYLT1	ACAP2	PPP1R2	MUC20
MUC4	TNK2	TFRC	ZDHHC19	UBXN7	RNF168	PAK2	SENP5	NCBP2	DLG1	BDH1	FYTTD1	LRCH3	IQCG	LMLN	ZNF718	ZNF732	ZNF141	ZNF721	PIGG
PDE6B	MYL5	GAK	TMEM175	DGKQ	SLC26A1	IDUA	FGFRL1	SPON2	MAEA	UVSSA	TACC3	FGFR3	NSD2	POLN	MXD4	ZFYVE28	RNF4	FAM193A	NOP14
GRK4	HTT	RGS12	HGFAC	OTOP1	EVC2	EVC	CRMP1	C4orf50	WFS1	MAN2B2	KIAA0232	TBC1D14	TADA2B	SORCS2	PSAPL1	ABLIM2	SH3TC1	HTRA3	ACOX3
GPR78	DEFB131A	DRD5	SLC2A9	WDR1	ZNF518B	CLNK	BOD1L1	CPEB2	CC2D2A	FBXL5	FAM200B	BST1	FGFBP1	PROM1	TAPT1	LDB2	QDPR	MED28	FAM184B
DCAF16	NCAPG	LCORL	SLIT2	PACRGL	ADGRA3	PPARGC1A	DHX15	CCDC149	LGI2	SEPSECS	ZCCHC4	ANAPC4	SEL1L3	RBPJ	CCKAR	TBC1D19	STIM2	ARAP2	DTHD1
NWD2	TBC1D1	KLF3	TLR10	TLR1	TLR6	FAM114A1	KLHL5	WDR19	RFC1	RPL9	LIAS	UGDH	UBE2K	PDS5A	N4BP2	CHRNA9	NSUN7	APBB2	LIMCH1
TMEM33	DCAF4L1	SLC30A9	BEND4	ATP8A1	GRXCR1	KCTD8	YIPF7	GUF1	GABRG1	GABRA2	COX7B2	GABRA4	GABRB1	ATP10D	CORIN	NIPAL1	TXK	TEC	SLAIN2
FRYL	OCIAD1	CWH43	DCUN1D4	LRRC66	SGCB	SPATA18	USP46	RASL11B	FIP1L1	PDGFRA	KIT	KDR	TMEM165	PDCL2	EXOC1	CEP135	CRACD	AASDH	PPAT
PAICS	SRP72	ARL9	THEGL	HOPX	REST	POLR2B	ADGRL3	TECRL	EPHA5	CENPC	STAP1	UBA6	GNRHR	TMPRSS11D	TMPRSS11A	TMPRSS11B	UGT2B7	UGT2B28	UGT2A2
UGT2A1	SULT1B1	SULT1E1	CSN1S1	ODAM	FDCSP	CABS1	SMR3A	OPRPN	MUC7	AMBN	ENAM	UTP3	GRSF1	MOB1B	DCK	SLC4A4	NPFFR2	ADAMTS3	COX18
ANKRD17	AFP	AFM	RASSF6	CXCL8	CXCL6	MTHFD2L	EREG	PARM1	THAP6	ODAPH	CDKL2	G3BP2	PPEF2	SDAD1	ART3	NUP54	SCARB2	FAM47E	CCDC158
SHROOM3	SEPTIN11	CCNG2	CNOT6L	MRPL1	FRAS1	ANXA3	BMP2K	NAA11	GK2	ANTXR2	PRDM8	FGF5	CFAP299	BMP3	RASGEF1B	HNRNPD	HNRNPDL	TMEM150C	SEC31A
THAP9	LIN54	COQ2	HPSE	HELQ	MRPS18C	GPAT3	WDFY3	ARHGAP24	MAPK10	PTPN13	SLC10A6	C4orf36	AFF1	KLHL8	HSD17B13	HSD17B11	NUDT9	SPARCL1	DSPP
DMP1	MEPE	PKD2	ABCG2	HERC6	HERC5	HERC3	TIGD2	GPRIN3	MMRN1	CCSER1	GRID2	ATOH1	SMARCAD1	PDLIM5	BMPR1B	UNC5C	PDHA2	METAP1	ADH4
ADH1A	ADH1B	ADH7	TRMT10A	MTTP	DAPP1	DNAJB14	DDIT4L	EMCN	PPP3CA	BANK1	SLC39A8	NFKB1	MANBA	SLC9B1	SLC9B2	BDH2	CENPE	TACR3	CXXC4
TET2	PPA2	INTS12	NPNT	TBCK	AIMP1	PAPSS1	SGMS2	CYP2U1	ETNPPL	COL25A1	SEC24B	CASP6	PLA2G12A	LRIT3	EGF	ELOVL6	ENPEP	AP1AR	ALPK1
NEUROG2	ZGRF1	LARP7	ANK2	CAMK2D	ARSJ	UGT8	NDST4	NDST3	PRSS12	METTL14	SEC24D	SYNPO2	USP53	C4orf3	PDE5A	PRDM5	NDNF	TNIP3	QRFPR
ANXA5	EXOSC9	TRPC3	BLTP1	ADAD1	IL21	FGF2	NUDT6	SPATA5	ANKRD50	FAT4	INTU	HSPA4L	PLK4	ABHD18	LARP1B	JADE1	SCLT1	C4orf33	PCDH10
PABPC4L	PCDH18	NOCT	ELF2	MAML3	MGAT4D	UCP1	TBC1D9	RNF150	ZNF330	INPP4B	USP38	SMARCA5	FREM3	GYPE	GYPA	HHIP	OTUD4	SMAD1	MMAA
C4orf51	ZNF827	LSM6	POU4F2	TMEM184C	ARHGAP10	NR3C2	DCLK2	LRBA	RPS3A	FHIP1A	GATB	FBXW7	TMEM154	TIGD4	FHDC1	TRIM2	MND1	TMEM131L	TLR2
RNF175	DCHS2	PLRG1	FGB	FGA	FGG	RBM46	NPY2R	MAP9	GUCY1A1	GUCY1B1	ASIC5	PDGFC	GRIA2	GASK1B	RXFP1	ETFDH	PPID	FNIP2	C4orf45
RAPGEF2	FSTL5	NPY5R	TKTL2	TMA16	MARCHF1	TRIM60	TMEM192	CPE	TLL1	SPOCK3	ANXA10	DDX60	DDX60L	PALLD	CBR4	SH3RF1	NEK1	HPF1	MFAP3L
AADAT	GALNT7	SAP30	FBXO8	ADAM29	WDR17	SPATA4	ASB5	TENM3	WWC2	CDKN2AIP	ING2	TRAPPC11	STOX2	ENPP6	IRF2	CASP3	CENPU	ACSL1	CFAP97
LRP2BP	C4orf47	CCDC110	SORBS2	TLR3	FAM149A	CYP4V2	F11	MTNR1A	FAT1	ZFP42	TRIML2	TRIML1	PLEKHG4B	EXOC3	SLC9A3	CEP72	BRD9	TRIP13	SLC12A7
SLC6A18	TERT	CLPTM1L	LPCAT1	MRPL36	IRX4	IRX2	IRX1	ADAMTS16	ICE1	NSUN2	SRD5A1	TENT4A	ADCY2	MTRR	SEMA5A	TAS2R1	CCT5	MARCHF6	CTNND2
DNAH5	TRIO	OTULIN	ANKH	ZNF622	MYO10	CDH18	CDH12	PRDM9	CDH10	CDH9	CDH6	DROSHA	PDZD2	GOLPH3	MTMR12	ZFR	SUB1	NPR3	TARS1
ADAMTS12	RXFP3	SLC45A2	AMACR	RAI14	TTC23L	BRIX1	PRLR	SPEF2	IL7R	UGT3A2	LMBRD2	SKP2	NADK2	RANBP3L	SLC1A3	NIPBL	CPLANE1	NUP155	WDR70
EGFLAM	LIFR	OSMR	RICTOR	FYB1	C9	DAB2	PTGER4	TTC33	PRKAA1	CARD6	C7	MROH2B	C6	PLCXD3	OXCT1	RIMOC1	FBXO4	GHR	ZNF131
NIM1K	HMGCS1	C5orf34	PAIP1	NNT	FGF10	HCN1	EMB	PARP8	ISL1	ITGA1	ITGA2	SNX18	GZMK	CDC20B	CCNO	DHX29	MTREX	PLPP1	SLC38A9
DDX4	IL31RA	IL6ST	ANKRD55	MAP3K1	SETD9	GPBP1	PLK2	GAPT	RAB3C	PDE4D	DEPDC1B	ELOVL7	ZSWIM6	DIMT1	IPO11	LRRC70	HTR1A	RNF180	SREK1IP1
CWC27	ADAMTS6	PPWD1	TRIM23	TRAPPC13	SGTB	NLN	ERBIN	SREK1	MAST4	CD180	PIK3R1	SLC30A5	CCNB1	CCDC125	RAD17	MARVELD2	OCLN	BDP1	MAP1B
MRPS27	PTCD2	ZNF366	TNPO1	FCHO2	BTF3	UTP15	ARHGEF28	HEXB	GFM2	FAM169A	GCNT4	ANKRD31	HMGCR	CERT1	POLK	POC5	SV2C	IQGAP2	F2RL2
F2RL1	S100Z	CRHBP	OTP	TBCA	AP3B1	JMY	TENT2	CMYA5	MTX3	THBS4	SERINC5	SPZ1	ZFYVE16	FAM151B	ANKRD34B	MSH3	RASGRF2	ACOT12	SSBP2
XRCC4	VCAN	HAPLN1	EDIL3	RASA1	CCNH	TMEM161B	MBLAC2	LYSMD3	ADGRV1	NR2F1	FAM172A	KIAA0825	SLF1	MCTP1	FAM81B	SKIC3	ARSK	GPR150	RHOBTB3
ELL2	PCSK1	CAST	ERAP1	ERAP2	LNPEP	RGMB	CHD1	SLCO4C1	PAM	GIN1	PPIP5K2	NUDT12	FBXL17	FER	PJA2	MAN2A1	TMEM232	SLC25A46	TSLP
WDR36	CAMK4	EPB41L4A	APC	DCP2	MCC	TSSK1B	YTHDC2	KCNN2	TRIM36	PGGT1B	TICAM2	AP3S1	LVRN	SEMA6A	DTWD2	DMXL1	FTMT	LOX	SNCAIP
SNX24	CEP120	CSNK1G3	GRAMD2B	MEGF10	PRRC1	FBN2	SLC27A6	ADAMTS19	CHSY3	LYRM7	RAPGEF6	P4HA2	SLC22A4	SLC22A5	IRF1	RAD50	KIF3A	CCNI2	SOWAHA
SHROOM1	GDF9	LEAP2	AFF4	HSPA4	C5orf15	TCF7	JADE2	SAR1B	SEC24A	CAMLG	DDX46	TXNDC15	PCBD2	DCANP1	TIFAB	SLC25A48	LECT2	TRPC7	SPOCK1
KLHL3	HNRNPA0	MYOT	PKD2L2	FAM13B	WNT8A	BRD8	KIF20A	CDC23	GFRA3	FAM53C	KDM3B	EGR1	CTNNA1	LRRTM2	SIL1	SLC23A1	MZB1	PROB1	DNAJC18
PSD2	NRG2	ANKHD1	APBB3	CD14	IK	WDR55	HARS2	PCDHA1	PCDHB1	PCDHB2	PCDHB3	PCDHB4	PCDHB5	PCDHB6	PCDHB7	PCDHB8	PCDHB16	PCDHB10	PCDHB11
PCDHB12	PCDHB13	PCDHB15	SLC25A2	TAF7	PCDHGA1	PCDHGB5	DIAPH1	HDAC3	FCHSD1	ARAP3	PCDH1	PCDH12	FGF1	ARHGAP26	NR3C1	KCTD16	GRXCR2	PLAC8L1	LARS1
POU4F3	TCERG1	GPR151	PPP2R2B	STK32A	JAKMIP2	SPINK5	FBXO38	HTR4	SH3TC2	ABLIM3	AFAP1L1	ARHGEF37	SLC26A2	PDGFRB	CDX1	CAMK2A	TCOF1	NDST1	SYNPO
MYOZ3	DCTN4	SMIM3	IRGM	ANXA6	GM2A	SLC36A2	SLC36A1	FAT2	SPARC	G3BP1	NMUR2	GRIA1	FAM114A2	GALNT10	LARP1	GEMIN5	MRPL22	KIF4B	SGCD
TIMD4	HAVCR1	GARIN3	ITK	CYFIP2	ADAM19	SOX30	LSM11	CLINT1	IL12B	TTC1	PWWP2A	CCNJL	C1QTNF2	PTTG1	ATP10B	GABRB2	GABRA6	GABRA1	GABRG2
CCNG1	HMMR	MAT2B	TENM2	RARS1	PANK3	SLIT3	SPDL1	DOCK2	FOXI1	RANBP17	TLX3	NPM1	EFCAB9	SH3PXD2B	NEURL1B	CREBRF	STC2	CPEB4	C5orf47
DRD1	SFXN1	HRH2	SIMC1	RNF44	CDHR2	GPRIN1	SNCB	UNC5A	UIMC1	NSD1	MXD3	SLC34A1	PFN3	GRK6	PDLIM7	FAM193B	FAM153A	PROP1	N4BP3
RMND5B	HNRNPAB	PHYKPL	CLK4	ZNF354A	ZNF354B	ZFP2	ZNF454	GRM6	ZNF879	ZNF354C	ADAMTS2	RUFY1	HNRNPH1	CANX	MAML1	MGAT4B	TBC1D9B	RASGEF1C	GFPT2
FLT4	OR2Y1	ZFP62	BTNL8	BTNL3	BTNL9	TRIM7	IRF4	EXOC2	HUS1B	FOXC1	GMDS	MYLK4	WRNIP1	SERPINB1	SERPINB9	SERPINB6	NQO2	RIPK1	TUBB2A
PSMG4	SLC22A23	PXDC1	FAM50B	PRPF4B	FAM217A	ECI2	RPP40	LYRM4	F13A1	RREB1	SSR1	CAGE1	RIOK1	DSP	SLC35B3	TFAP2A	GCNT2	PAK1IP1	TMEM14B
SYCP2L	ELOVL2	SMIM13	TMEM170B	ADTRP	HIVEP1	EDN1	PHACTR1	TBC1D7	GFOD1	RANBP9	MCUR1	JARID2	DTNBP1	ATXN1	STMND1	FAM8A1	NUP153	KIF13A	NHLRC1
KDM1B	E2F3	PRL	HDGFL1	NRSN1	DCDC2	MRS2	ALDH5A1	KIAA0319	ACOT13	C6orf62	GMNN	RIPOR2	CARMIL1	SCGN	H2AC1	SLC17A4	SLC17A1	SLC17A3	SLC17A2
HIST1H4B	H2BC4	H2BC5	H4C7	H2BC9	BTN3A2	BTN2A2	BTN3A3	BTN1A1	ABT1	H4C9	PRSS16	POM121L2	ZNF391	ZNF184	H2AC15	OR2B2	ZSCAN16	ZKSCAN8	ZSCAN9
ZKSCAN4	NKAPL	ZSCAN26	PGBD1	ZSCAN31	ZKSCAN3	ZSCAN12	ZSCAN23	CCHCR1	ITPR3	IP6K3	LEMD2	GRM4	BLTP3A	ANKS1A	SCUBE3	ZNF76	PPARD	FANCE	TULP1
ARMC12	LHFPL5	SRPK1	SLC26A8	MAPK14	PNPLA1	BNIP5	ETV7	SRSF3	CDKN1A	RAB44	CPNE5	C6orf89	FGD2	TMEM217	TBC1D22B	RNF8	CMTR1	MDGA1	BTBD9
DNAH8	KCNK5	KCNK16	KIF6	DAAM2	MOCS1	LRFN2	UNC5CL	NFYA	TREML1	TREM2	NCR2	MDFI	PGC	FRS3	USP49	CCND3	TAF8	TRERF1	UBR2
PRPH2	TBCC	BICRAL	KLHDC3	RRP36	CUL7	PTK7	SRF	CUL9	TTBK1	SLC22A7	ZNF318	ABCC10	DLK2	YIPF3	POLR1C	POLH	GTPBP2	TMEM63B	CAPN11
SLC29A1	HSP90AB1	TMEM151B	AARS2	SPATS1	CDC5L	SUPT3H	RUNX2	CLIC5	ENPP4	ENPP5	RCAN2	CYP39A1	TDRD6	PLA2G7	ANKRD66	MEP1A	ADGRF5	TNFRSF21	CD2AP
ADGRF4	PTCHD4	MMUT	C6orf141	RHAG	CRISP2	PGK2	CRISP1	DEFB110	DEFB112	TFAP2D	TFAP2B	PKHD1	IL17A	MCM3	PAQR8	EFHC1	TMEM14A	GSTA1	GSTA3
GSTA4	CILK1	FBXO9	GCM1	ELOVL5	GCLC	KLHL31	LRRC1	MLIP	TINAG	FAM83B	HCRTR2	GFRAL	BMP5	COL21A1	DST	BEND6	KIAA1586	ZNF451	RAB23
PRIM2	LGSN	PHF3	EYS	ADGRB3	LMBRD1	COL19A1	COL9A1	FAM135A	SMAP1	OGFRL1	RIMS1	KCNQ5	KHDC3L	DDX43	CGAS	COL12A1	COX7A2	TMEM30A	FILIP1
SENP6	MYO6	IMPG1	HTR1B	IRAK1BP1	PHIP	HMGN3	LCA5	SH3BGRL2	TTK	BCKDHB	TENT5A	IBTK	UBE3D	DOP1A	PGM3	RWDD2A	ME1	PRSS35	SNAP91
CYB5R4	CEP162	TBX18	NT5E	SNX14	SYNCRIP	HTR1E	ZNF292	GJB7	C6orf163	CFAP206	RARS2	ORC3	SPACA1	CNR1	RNGTT	SRSF12	GABRR1	GABRR2	RRAGD
LYRM2	MDN1	CASP8AP2	GJA10	BACH2	MAP3K7	EPHA7	MANEA	UFL1	GPR63	KLHL32	MMS22L	FBXL4	FAXC	COQ3	PNISR	USP45	PRDM13	MCHR2	SIM1
ASCC3	GRIK2	HACE1	BVES	POPDC3	PREP	PRDM1	ATG5	CRYBG1	RTN4IP1	QRSL1	MTRES1	BEND3	SOBP	SCML4	SEC63	OSTM1	NR2E1	FOXO3	ARMC2
SESN1	CEP57L1	SMPD2	MICAL1	ZBTB24	AK9	FIG4	GPR6	WASF1	CDC40	DDO	SLC22A16	CDK19	AMD1	RPF2	SLC16A10	MFSD4B	TRAF3IP2	LAMA4	RFPL4B
MARCKS	HDAC2	HS3ST5	TSPYL4	TSPYL1	CALHM6	TRAPPC3L	RWDD1	ZUP1	KPNA5	GPRC6A	RFX6	ROS1	GOPC	SLC35F1	CEP85L	MCM9	ASF1A	FAM184A	MAN1A1
TBC1D32	GJA1	SERINC1	SMPDL3A	CLVS2	TRDN	RNF217	TPD52L1	HEY2	NCOA7	TRMT11	RNF146	KIAA0408	C6orf58	THEMIS	PTPRK	LAMA2	L3MBTL3	SAMD3	TMEM200A
EPB41L2	AKAP7	MED23	ENPP3	OR2A4	CTAGE9	ENPP1	CCN2	MOXD1	TAAR8	TAAR6	TAAR5	TAAR2	TAAR1	VNN1	SLC18B1	RPS12	EYA4	TCF21	SLC2A12
SGK1	HBS1L	MYB	AHI1	PDE7B	MTFR2	BCLAF1	MAP7	MAP3K5	SLC35D3	IL20RA	IL22RA2	IFNGR1	TNFAIP3	ARFGEF3	HEBP2	CCDC28A	ECT2L	REPS1	TXLNB
NMBR	ADGRG6	HIVEP2	PEX3	FUCA2	PHACTR2	LTV1	ZC2HC1B	PLAGL1	UTRN	EPM2A	FBXO30	SHPRH	GRM1	RAB32	ADGB	STXBP5	SAMD5	SASH1	UST
TAB2	PPIL4	GINM1	KATNA1	LATS1	PCMT1	LRP11	RAET1L	IYD	PLEKHG1	MTHFD1L	AKAP12	ESR1	SYNE1	MYCT1	FBXO5	MTRF1L	OPRM1	SCAF8	TIAM2
TFB1M	NOX3	ARID1B	ZDHHC14	SNX9	SERAC1	TULP4	TMEM181	EZR	RSPH3	TAGAP	FNDC1	SOD2	ACAT2	TCP1	PNLDC1	IGF2R	SLC22A1	SLC22A2	LPA
PLG	MAP3K4	AGPAT4	PACRG	QKI	PDE10A	RPS6KA2	CEP43	CCR6	TTLL2	AFDN	KIF25	FRMD1	DACT2	SMOC2	THBS2	PHF10	ERMARD	DLL1	FAM120B
PSMB1	FAM20C	PDGFA	PRKAR1B	DNAAF5	SUN1	MICALL2	INTS1	TMEM184A	ELFN1	MRM2	NUDT1	CHST12	BRAT1	IQCE	GNA12	CARD11	SDK1	FOXK1	AP5Z1
RADIL	PAPOLB	RBAK	TNRC18	FBXL18	FSCN1	RNF216	CCZ1	AIMP2	EIF2AK1	SAGSIN1	DAGLB	GRID2IP	ZNF12	RSPH10B2	CCZ1B	C1GALT1	COL28A1	MIOS	RPA3
GLCCI1	ICA1	NXPH1	PHF14	THSD7A	TMEM106B	VWDE	ETV1	DGKB	AGMO	MEOX2	CRPPA	LRRC72	ANKMY2	BZW2	TSPAN13	AGR2	AHR	SNX13	PRPS1L1
HDAC9	FERD3L	POLR1F	MACC1	ITGB8	ABCB5	SP8	SP4	DNAH11	CDCA7L	STEAP1B	KLHL7	NUP42	GPNMB	MALSU1	FAM221A	STK31	PALS2	GSDME	OSBPL3
C7orf31	NPVF	NFE2L3	HNRNPA2B1	SNX10	HOXA1	HOXA2	HOXA4	HOXA9	HOXA11	EVX1	TAX1BP1	CREB5	CPVL	CHN2	SCRN1	PLEKHA8	ZNRF2	GARS1	CRHR2
MINDY4	ADCYAP1R1	NEUROD6	ITPRID1	PDE1C	AVL9	KBTBD2	NT5C3A	BBS9	BMPER	DPY19L1	TBX20	SEPTIN7	MATCAP2	ANLN	AOAH	ELMO1	NME8	STARD3NL	AMPH
VPS41	RALA	CDK13	SUGCT	INHBA	GLI3	HECW1	COA1	BLVRA	URGCP	DBNL	POLM	AEBP1	NUDCD3	NPC1L1	OGDH	ZMIZ2	PPIA	H2AZ2	NACAD
ADCY1	IGFBP1	TNS3	PKD1L1	SUN3	C7orf57	UPP1	ABCA13	ZPBP	SPATA48	IKZF1	FIGNL1	GRB10	COBL	POM121L12	EGFR	LANCL2	CCT6A	PHKG1	ZNF479
ZNF716	ZNF727	ZNF735	ZNF680	ZNF107	ZNF138	ZNF273	ZNF92	GUSB	ASL	TYW1	AUTS2	GALNT17	CALN1	POM121	TRIM50	FKBP6	BAZ1B	BCL7B	TBL2
STX1A	EIF4H	GTF2IRD1	GTF2I	GTF2IRD2	GTF2IRD2B	POM121C	CCL26	CCL24	RHBDD2	STYXL1	YWHAG	SSC4D	ZP3	POMZP3	FGL2	CCDC146	GSAP	PTPN12	RSBN1L
TMEM60	PHTF2	MAGI2	GNAT3	CD36	HGF	CACNA2D1	PCLO	SEMA3E	SEMA3A	SEMA3D	GRM3	ELAPOR2	DMTF1	CROT	ABCB4	ABCB1	RUNDC3B	SLC25A40	ADAM22
SRI	STEAP4	TEX47	ZNF804B	STEAP2	CFAP69	CDK14	FZD1	MTERF1	AKAP9	CYP51A1	LRRD1	ANKIB1	PEX1	RBM48	SAMD9	SAMD9L	HEPACAM2	VPS50	TFPI2
COL1A2	CASD1	SGCE	PEG10	PPP1R9A	PON3	SLC25A13	DLX5	ASNS	OCM2	LMTK2	TECPR1	BAIAP2L1	NPTX2	TMEM130	TRRAP	SMURF1	KPNA7	ARPC1B	PDAP1
BUD31	ZNF789	FAM200A	ZNF655	ZSCAN25	CYP3A5	CYP3A4	CYP3A43	OR2AE1	TRIM4	AZGP1	ZNF3	COPS6	AP4M1	CNPY4	TRAPPC14	GAL3ST4	STAG3	SPDYE3	PILRB
MEPCE	SPACDR	NYAP1	FBXO24	PCOLCE	TFR2	ACTL6B	GNB2	GIGYF1	EPHB4	SLC12A9	SRRT	ACHE	MUC3A	MUC12	MUC17	TRIM56	SERPINE1	VGF	CLDN15
MYL10	CUX1	PRKRIP1	LRWD1	FBXL13	PMPCB	PSMC2	SLC26A5	RELN	ORC5	LHFPL3	KMT2E	SRPK2	PUS7	RINT1	ATXN7L1	PIK3CG	PRKAR2B	COG5	GPR22
DUS4L	BCAP29	SLC26A4	CBLL1	SLC26A3	DLD	LAMB4	NRCAM	PNPLA8	THAP5	DNAJB9	LRRN3	DOCK4	TMEM168	PPP1R3A	FOXP2	MDFIC	TFEC	TES	CAV2
MET	CAPZA2	ST7	CFTR	CTTNBP2	LSM8	ANKRD7	KCND2	TSPAN12	ING3	CPED1	WNT16	FAM3C	PTPRZ1	AASS	FEZF1	CADPS2	RNF133	RNF148	TAS2R16
SLC13A1	IQUB	ASB15	WASL	HYAL4	SPAM1	GPR37	POT1	GRM8	ZNF800	GCC1	ARF5	FSCN3	PAX4	SND1	LRRC4	PRRT4	CALU	CCDC136	FLNC
ATP6V1F	ATP6V1FNB	SMO	AHCYL2	STRIP2	UBE2H	ZC3HC1	SSMEM1	CPA2	CPA5	CPA1	MKLN1	PODXL	PLXNA4	EXOC4	LRGUK	SLC35B4	AKR1B1	AKR1B15	BPGM
CALD1	AGBL3	CYREN	WDR91	CNOT4	NUP205	SLC13A4	CHRM2	PTN	AKR1D1	TRIM24	SVOPL	ATP6V0A4	KIAA1549	ZC3HAV1	UBN2	HIPK2	TBXAS1	KDM7A	SLC37A3
MKRN1	DENND2A	BRAF	MRPS33	TMEM178B	AGK	DENND11	WEE2	TAS2R5	PRSS37	OR9A4	CLEC5A	MGAM	MGAM2	EPHB6	TRPV6	TRPV5	KEL	TAS2R39	TAS2R40
GSTK1	CASP2	CLCN1	EPHA1	TAS2R60	TAS2R41	CTAGE15	TCAF2	CTAGE6	OR2F2	OR2F1	OR6B1	OR2A5	OR2A25	OR2A12	OR2A1	ARHGEF5	NOBOX	CNTNAP2	C7orf33
CUL1	EZH2	ZNF786	ZNF425	ZNF398	ZNF777	ZNF746	ZNF467	ZNF862	REPIN1	GIMAP8	GIMAP7	GIMAP2	GIMAP1	TMEM176B	TMEM176A	KCNH2	NOS3	ABCB8	SLC4A2
FASTK	ASB10	CHPF2	SMARCD3	NUB1	CRYGN	PRKAG2	GALNT11	KMT2C	XRCC2	ACTR3B	DPP6	PAXIP1	CNPY1	RBM33	RNF32	LMBR1	NOM1	PTPRN2	NCAPG2
ESYT2	DYNC2I1	VIPR2	FBXO25	ERICH1	DLGAP2	ARHGEF10	KBTBD11	MYOM2	CSMD1	MCPH1	ANGPT2	AGPAT5	DEFA5	ZNF705G	DEFB4A	PRAG1	CLDN23	ERI1	PPP1R3B
TNKS	RP1L1	C8orf74	XKR6	SLC35G5	FAM167A	BLK	GATA4	NEIL2	DEFB135	FAM86B1	LONRF1	TRMT9B	DLC1	C8orf48	SGCZ	TUSC3	MSR1	MICU3	CNOT7
MTMR7	SLC7A2	MTUS1	FGL1	PCM1	ASAH1	NAT1	NAT2	PSD3	SH2D4A	CSGALNACT1	INTS10	LPL	SLC18A1	ATP6V1B2	XPO7	DMTN	FHIP2B	HR	REEP4
BMP1	PHYHIP	POLR3D	PIWIL2	PPP3CC	PDLIM2	CCAR2	BIN3	EGR3	RHOBTB2	TNFRSF10B	CHMP7	R3HCC1	SLC25A37	ADAM28	ADAMDEC1	ADAM7	NEFL	DOCK5	KCTD9
CDCA2	EBF2	PPP2R2A	BNIP3L	PNMA2	ADRA1A	PTK2B	CHRNA2	EPHX2	SCARA3	ESCO2	SCARA5	NUGGC	ELP3	ZNF395	EXTL3	HMBOX1	KIF13B	RBPMS	GTF2E2
GSR	PPP2CB	TEX15	WRN	NRG1	FUT10	TTI2	UNC5D	KCNU1	PLPBP	BRF2	RAB11FIP1	GOT1L1	STAR	DDHD2	NSD3	LETM2	FGFR1	TACC1	HTRA4
ADAM9	ADAM32	ADAM18	ADAM2	IDO1	IDO2	SFRP1	GPAT4	ANK1	KAT6A	PLAT	SLC20A2	CHRNB3	HOOK3	FNTA	POMK	POTEA	SPIDR	MCM4	UBE2V2
CLXN	SNAI2	SNTG1	PXDNL	PCMTD1	ST18	ALKAL1	RB1CC1	ATP6V1H	RGS20	LYPLA1	SOX17	RP1	XKR4	TMEM68	TGS1	LYN	RPS20	PLAG1	SDR16C5
FAM110B	CYP7A1	NSMAF	TOX	CA8	RAB2A	CHD7	CLVS1	ASPH	NKAIN3	TTPA	BHLHE22	CYP7B1	ARMC1	MTFR1	DNAJC5B	TRIM55	CRH	MYBL1	VCPIP1
MCMDC2	TCF24	COPS5	CSPP1	ARFGEF1	CPA6	PREX2	C8orf34	SULF1	SLCO5A1	PRDM14	NCOA2	TRAM1	LACTB2	XKR9	EYA1	TRPA1	KCNB2	C8orf89	STAU2
ELOC	JPH1	GDAP1	PI15	CRISPLD1	ZFHX4	ZC2HC1A	HEY1	ZBTB10	PAG1	PMP2	IMPA1	SLC10A5	ZFAND1	CHMP4C	SNX16	LRRCC1	RBIS	CA1	CA3
CA2	PSKH2	ATP6V0D2	WWP1	RMDN1	CNGB3	CNBD1	DCAF4L2	MMP16	NBN	CALB1	NECAB1	PIP4P2	OTUD6B	LRRC69	SLC26A7	RUNX1T1	RBM12B	TMEM67	PDP1
CDH17	GEM	RAD54B	VIRMA	ESRP1	DPY19L4	INTS8	PLEKHF2	GDF6	UQCRB	MTERF3	PTDSS1	SDC2	CPQ	TSPYL5	MTDH	LAPTM4B	ERICH5	POP1	NIPAL2
KCNS2	STK3	OSR2	VPS13B	COX6C	RGS22	FBXO43	SPAG1	RNF19A	PABPC1	YWHAZ	GRHL2	NCALD	UBR5	ODF1	AZIN1	ATP6V1C1	FZD6	CTHRC1	SLC25A32
DCAF13	RIMS2	DCSTAMP	DPYS	LRP12	ZFPM2	OXR1	ABRA	RSPO2	EMC2	TMEM74	TRHR	NUDCD1	PKHD1L1	KCNV1	CSMD3	TRPS1	EIF3H	UTP23	RAD21
AARD	SLC30A8	TNFRSF11B	COLEC10	ENPP2	TAF2	DSCC1	COL14A1	MTBP	SNTB1	HAS2	ZHX2	TBC1D31	FAM83A	C8orf76	ZHX1	ATAD2	ANXA13	FAM91A1	FER1L6
TRMT12	NDUFB9	ZNF572	WASHC5	TRIB1	POU5F1B	MYC	GSDMC	CYRIB	ASAP1	ADCY8	EFR3A	OC90	KCNQ3	DNAAF11	PHF20L1	TG	CCN4	NDRG1	ZFAT
KHDRBS3	FAM135B	COL22A1	KCNK9	TRAPPC9	AGO2	PTK2	DENND3	SLC45A4	GPR20	PTP4A3	ADGRB1	JRK	THEM6	SLURP2	CYP11B1	ZNF696	MAFA	ZC3H3	GSDMD
NAPRT	EEF1D	PYCR3	GFUS	ZNF623	CCDC166	MAPK15	FAM83H	SCRIB	PUF60	NRBP2	EPPK1	PLEC	PARP10	SPATC1	OPLAH	SHARPIN	WDR97	MROH1	SCRT1
TMEM249	FBXL6	SLC52A2	ADCK5	CPSF1	SLC39A4	TONSL	KIFC2	PPP1R16A	GPT	MFSD3	RECQL4	ARHGAP39	ZNF251	ZNF34	COMMD5	ZNF250	ZNF16	C8orf33	FOXD4
DOCK8	KANK1	DMRT1	DMRT2	SMARCA2	VLDLR	KCNV2	PUM3	RFX3	GLIS3	SLC1A1	SPATA6L	CDC37L1	RCL1	JAK2	INSL6	INSL4	RLN2	RLN1	PLGRKT
CD274	PDCD1LG2	RIC1	ERMP1	KIAA2026	RANBP6	IL33	UHRF2	GLDC	KDM4C	PTPRD	LURAP1L	MPDZ	NFIB	ZDHHC21	CER1	FREM1	TTC39B	SNAPC3	PSIP1
CCDC171	BNC2	CNTLN	ADAMTSL1	SAXO1	RRAGA	HAUS6	DENND4C	RPS6	ACER2	MLLT3	FOCAD	IFNB1	IFNA7	IFNA10	IFNA16	IFNA17	IFNA14	KLHL9	IFNA6
IFNA2	IFNA8	MTAP	CDKN2A	ELAVL2	IZUMO3	TUSC1	CAAP1	PLAA	IFT74	TEK	C9orf72	LINGO2	RIGI	TOPORS	TAF1L	APTX	SMU1	NFX1	AQP7
NOL6	ANKRD18B	UBE2R2	UBAP2	KIF24	C9orf24	DNAI1	CNTFR	ARID3C	SIGMAR1	FAM205A	PHF24	DNAJB5	C9orf131	VCP	FANCG	PIGO	STOML2	ATOSB	UNC13B
RUSC2	TESK1	CD72	ARHGEF39	CA9	TLN1	GBA2	NPR2	SPAG8	TMEM8B	OR13J1	HRCT1	OR2S2	RECK	CCIN	RNF38	MELK	PAX5	ZCCHC7	POLR1E
FBXO10	FRMPD1	TRMT10B	EXOSC3	DCAF10	ALDH1B1	CNTNAP3	ZNF658	SPATA31A6	SPATA31A7	ANKRD20A1	FOXD4L6	FOXD4L3	TMEM252	PIP5K1B	PRKACG	FXN	ENTREP1	APBA1	CFAP95
MAMDC2	SMC5	KLF9	TRPM3	CEMIP2	ABHD17B	C9orf57	GDA	ZFAND5	TMC1	ALDH1A1	ANXA1	RORB	TRPM6	CARNMT1	OSTF1	PCSK5	RFK	GCNT1	PRUNE2
VPS13A	GNAQ	CEP78	PSAT1	TLE4	TLE1	SPATA31D1	RASEF	GKAP1	KIF27	HNRNPK	RMI1	SLC28A3	NTRK2	AGTPBP1	NAA35	GOLM1	C9orf153	TUT7	DAPK1
SPATA31E1	SPATA31C1	SPATA31C2	SPIN1	SHC3	SECISBP2	SEMA4D	GADD45G	DIRAS2	SYK	ROR2	IARS1	NOL8	CENPP	OMD	ASPN	IPPK	BICD2	ZNF484	FGD3
WNK2	FAM120AOS	FAM120A	PHF2	BARX1	PTPDC1	ZNF169	NUTM2F	FBP2	AOPEP	FANCC	PTCH1	ERCC6L2	HSD17B3	CDC14B	ZNF510	ZNF782	NUTM2G	CTSV	CCDC180
TDRD7	TSTD2	NCBP1	XPA	FOXE1	TRMO	HEMGN	ANP32B	TRIM14	CORO2A	TBC1D2	GABBR2	ANKS6	GALNT12	COL15A1	TGFBR1	ALG2	NR4A3	STX17	ERP44
INVS	TEX10	MSANTD3	CAVIN4	BAAT	ZNF189	PGAP4	RNF20	GRIN3A	CYLC2	SMC2	OR13F1	OR13C4	OR13C3	OR13C5	OR13C2	OR13C9	NIPSNAP3B	ABCA1	SLC44A1
FSD1L	ZNF462	RAD23B	KLF4	ACTL7B	ELP1	TMEM245	FRRS1L	EPB41L4B	PALM2AKAP2	TXNDC8	SVEP1	MUSK	OR2K2	ECPAS	ZNF483	DNAJC25	SHOC1	SUSD1	PTBP3
INIP	SNX30	ZNF883	ZFP37	FKBP15	PRPF4	C9orf43	RGS3	ZNF618	AMBP	COL27A1	ORM1	AKNA	TMEM268	TNFSF8	TNC	PAPPA	ASTN2	TLR4	BRINP1
CDK5RAP2	MEGF9	FBXW2	PHF19	TRAF1	C5	CNTRL	RAB14	GSN	STOM	DAB2IP	TTLL11	MORN5	LHX6	OR1J2	OR1J4	OR1N1	OR1N2	OR1L8	OR1Q1
OR1L1	OR1L6	OR1K1	RC3H2	ZBTB6	ZBTB26	RABGAP1	GPR21	STRBP	CRB2	DENND1A	LHX2	NEK6	PSMB7	NR5A1	NR6A1	OLFML2A	SCAI	GAPVD1	MAPKAP1
PBX3	ZBTB43	ZBTB34	RALGPS1	GARNL3	SLC2A8	ZNF79	RPL12	LRSAM1	NIBAN2	CFAP157	PTRH1	SH2D3C	ST6GALNAC6	FAM102A	NAIF1	SLC25A25	GOLGA2	SWI5	ODF2
SPTAN1	DYNC2I2	SET	ZDHHC12	ZER1	LRRC8A	PHYHD1	NUP188	CRAT	NTMT1	USP20	FNBP1	ASS1	EXOSC2	LAMC3	NUP214	PLPP7	PRRC2B	POMT1	RAPGEF1
SETX	TTF1	CFAP77	DDX31	AK8	SPACA9	TSC1	MED22	RPL7A	SURF1	SURF4	STKLD1	REXO4	ADAMTS13	CACFD1	SLC2A6	MYMK	DBH	VAV2	BRD3
WDR5	COL5A1	FCN2	FCN1	OBP2A	PAEP	LCN9	SOHLH1	KCNT1	CAMSAP1	UBAC1	QSOX2	GPSM1	PMPCA	INPP5E	SEC16A	NOTCH1	EGFL7	RABL6	MAMDC4
TRAF2	ABCA2	SAPCD2	MAN1B1	DPP7	SLC34A3	STPG3	NELFB	DPH7	ARRDC1	EHMT1	CACNA1B	XG	GYG2	ARSD	ARSL	ARSF	MXRA5	PRKX	NLGN4X
PUDP	PNPLA4	ANOS1	FAM9A	FAM9B	TBL1X	SHROOM2	CLDN34	WWC3	CLCN4	MID1	HCCS	ARHGAP6	MSL3	FRMPD4	PRPS2	TLR7	TLR8	FAM9C	ATXN3L
EGFL6	TCEANC	RAB9A	OFD1	GEMIN8	GLRA2	FANCB	MOSPD2	ASB9	ASB11	PIGA	VEGFD	BMX	ACE2	CLTRN	ZRSR2	GRPR	CTPS2	TXLNG	REPS2
NHS	BEND2	SCML2	CDKL5	RS1	PPEF1	PHKA2	ADGRG2	MAP3K15	SH3KBP1	BCLAF3	MAP7D2	RPS6KA3	CNKSR2	KLHL34	YY2	SMS	PHEX	CBLL2	DDX53
PTCHD1	PRDX4	ACOT9	APOO	CXorf58	KLHL15	ZFX	SUPT20HL2	SUPT20HL1	PDK3	PCYT1B	POLA1	MAGEB18	MAGEB6	DCAF8L2	MAGEB10	DCAF8L1	IL1RAPL1	MAGEB2	MAGEB3
MAGEB4	MAGEB1	NR0B1	GK	TAB3	FTHL17	DMD	FAM47A	FAM47B	MAGEB16	CFAP47	FAM47C	PRRG1	LANCL3	CYBB	DYNLT3	SYTL5	RPGR	OTC	MID1IP1
BCOR	CXorf38	MED14	USP9X	DDX3X	NYX	CASK	GPR82	MAOA	MAOB	NDP	EFHC2	DUSP21	KDM6A	KRBOX4	ZNF674	CHST7	RP2	RGN	RBM10
UBA1	CDK16	USP11	ZNF157	ZNF41	SYN1	CFP	ELK1	UXT	ZNF81	ZNF630	SSX5	SSX4B	SLC38A5	FTSJ1	PORCN	EBP	TBC1D25	WDR13	WAS
GATA1	HDAC6	ERAS	PCSK1N	PQBP1	SLC35A2	OTUD5	KCND1	GRIPAP1	TFE3	CCDC120	PRAF2	GPKOW	PLP2	PRICKLE3	CACNA1F	CCDC22	FOXP3	PPP1R3F	CLCN5
AKAP4	CCNB3	SHROOM4	BMP15	NUDT10	EZHIP	NUDT11	GSPT2	MAGED1	SSX7	XAGE5	XAGE3	GPR173	TSPYL2	KDM5C	IQSEC2	SMC1A	RIBC1	HUWE1	PHF8
FAM120C	WNK3	TSR2	FGD1	GNL3L	ITIH6	MAGED2	TRO	PFKFB1	APEX2	ALAS2	MAGEH1	USP51	FOXR2	RRAGB	KLF8	UBQLN2	SPIN2B	FAAH2	ZXDB
ZXDA	ARHGEF9	AMER1	ZC3H12B	LAS1L	VSIG4	HEPH	EDA2R	AR	OPHN1	YIPF6	PJA1	NALF2	EDA	DGAT2L6	P2RY4	ARR3	PDZD11	KIF4A	GDPD2
DLG3	TEX11	SLC7A3	FOXO4	MED12	NLGN3	ZMYM3	NONO	ITGB1BP2	TAF1	OGT	GCNA	CXCR3	RTL5	NHSL2	PIN4	PHKA1	DMRTC1	NAP1L2	CDX4
ZCCHC13	NEXMIF	ABCB7	UPRT	MAGEE2	PBDC1	MAGEE1	FGF16	ATRX	PGAM4	ATP7A	PGK1	TAF9B	CYSLTR1	RTL3	LPAR4	P2RY10	GPR174	ITM2A	TBX22
BRWD3	HMGN5	POU3F4	CYLC1	RPS6KA6	HDX	ZNF711	POF1B	CHM	DACH2	KLHL4	CPXCR1	TGIF2LX	PABPC5	PCDH11X	NAP1L3	FAM133A	DIAPH2	RPA4	PCDH19
TNMD	TSPAN6	SRPX2	CSTF2	XKRX	TRMT2B	CENPI	DRP2	TAF7L	BTK	ARMCX4	ARMCX1	ARMCX6	ARMCX3	ARMCX2	ZMAT1	NXF2B	ARMCX5	GPRASP1	GPRASP2
GPRASP3	RAB40AL	BEX1	NXF3	BEX4	TCEAL8	TCEAL7	RAB40A	MORF4L2	TMEM31	RAB9B	H2BW2	SLC25A53	ZCCHC18	FAM199X	IL1RAPL2	TEX13A	NRK	SERPINA7	PWWP3B
RADX	RNF128	TBC1D8B	MORC4	RBM41	DNAAF6	FRMPD3	PRPS1	MID2	TEX13B	VSIG1	ATG4A	COL4A6	COL4A5	IRS4	GUCY2F	ACSL4	TMEM164	AMMECR1	RTL9
CHRDL1	PAK3	CAPN6	DCX	ALG13	TRPC5	RTL4	LHFPL1	AMOT	IL13RA2	LRCH2	AGTR2	SLC6A14	CT83	KLHL13	WDR44	DOCK11	LONRF3	KIAA1210	PGRMC1
SLC25A5	STEEP1	UBE2A	NKRF	SEPTIN6	SOWAHD	RPL39	UPF3B	RNF113A	NDUFA1	NKAP	RHOXF1	RHOXF2	ZBTB33	TMEM255A	LAMP2	CUL4B	C1GALT1C1	CT47B1	GLUD2
GRIA3	THOC2	XIAP	STAG2	TENM1	TEX13C	DCAF12L2	PRR32	ACTRT1	SMARCA1	OCRL	APLN	ZDHHC9	UTP14A	BCORL1	AIFM1	ZNF280C	SLC25A14	GPR119	RBMX2
ARHGAP36	IGSF1	FRMD7	RAP2C	MBNL3	HS6ST2	USP26	TFDP3	GPC4	GPC3	CCDC160	PHF6	HPRT1	PABIR3	MOSPD1	SMIM10	CT55	ZNF449	INTS6L	CT45A7
SAGE1	SLC9A6	FHL1	MAP7D3	ADGRG4	HTATSF1	CD40LG	ARHGEF6	RBMX	GPR101	ZIC3	F9	MCF2	ATP11C	CXorf66	SOX3	LDOC1	MAGEC3	MAGEC1	MAGEC2
SPANXN3	SLITRK4	SLITRK2	FMR1	FMR1NB	AFF2	IDS	MAGEA9B	TMEM185A	MAGEA11	MAGEA8	EOLA2	MAMLD1	MTM1	CD99L2	HMGB3	GPR50	PASD1	PRRG3	CNGA2
MAGEA4	GABRE	MAGEA10	GABRA3	GABRQ	MAGEA6	CETN2	NSDHL	ZNF185	PNMA5	PNMA3	MAGEA1	ZNF275	ZFP92	TREX2	BGN	ATP2B3	SLC6A8	BCAP31	PLXNB3
SRPK3	PDZD4	L1CAM	AVPR2	ARHGAP4	NAA10	RENBP	HCFC1	IRAK1	MECP2	OPN1LW	FLNA	EMD	FAM50A	PLXNA3	LAGE3	SLC10A3	FAM3A	GAB3	DKC1
MPP1	F8	H2AB1	CMC4	MTCP1	RAB39B	CLIC2	TMLHE	NLGN4Y

## Sheet: Table S3
Table S3. Quality assessment of whole exome sequencing and targeted panel sequencing data
Patient ID	Sample ID	Sequencing strategy	Tumor or normal	Raw Reads	Raw Bases(Gb)	Clean Reads	Clean Bases(Gb)	Effective Rate(%)	Read Length(bp)	Q20(%)	Q30(%)	GC(%)	Mapping Ratio (%)	Cov10X (%)	Cov50X (%)	Cov100X (%)
EC284	EC_284_T	TPS	Tumor	1523341528	152.33	1523274990	151.46	99.42	99	97.97	94.17	40.2	99.95	99.99	99.92	99.86
EC287	EC_287_T	TPS	Tumor	1384714638	138.47	1384576322	138.08	99.71	99	97.64	93.04	41.32	99.95	100	99.96	99.9
EC291	EC_291_T	TPS	Tumor	1272800666	127.28	1272699324	126.8	99.62	99	97.52	92.72	41.57	99.94	99.99	99.94	99.89
EC301	EC_301_T	TPS	Tumor	1325242668	132.52	1325151546	132.03	99.63	99	97.84	93.65	41.52	99.94	99.99	99.96	99.9
EC316	EC_316_T	TPS	Tumor	1226674044	122.67	1226576814	122.26	99.67	99	96.06	89.67	40.57	99.94	99.99	99.89	99.7
EC320	EC_320_T	TPS	Tumor	1563139290	156.31	1563030638	155.67	99.59	99	96.15	89.84	39.72	99.95	99.99	99.88	99.65
EC334	EC_334_T	TPS	Tumor	1272820700	127.28	1272734514	126.92	99.72	99	97.51	92.66	41.52	99.98	99.99	99.94	99.88
EC140	EC_140_T	TPS	Tumor	1083433204	108.34	1083340940	108.05	99.73	99	97.8	93.23	41.34	99.99	99.99	99.94	99.87
EC192	EC_192_T	TPS	Tumor	994925938	99.49	994855782	99.22	99.72	99	97.65	92.7	40.49	99.99	100	99.93	99.8
EC195	EC_195_T	TPS	Tumor	849154334	84.92	849093756	84.68	99.72	99	97.86	93.24	41.01	99.99	99.99	99.94	99.84
EC211	EC_211_T	TPS	Tumor	846610078	84.66	846529598	84.43	99.73	99	97.75	92.96	41.44	99.98	99.99	99.94	99.83
EC310	EC_310_T	TPS	Tumor	1469375752	146.94	1469238902	146.42	99.65	99	97.82	93.58	40.78	99.9	99.97	99.94	99.88
EC329	EC_329_T	TPS	Tumor	1373912068	137.39	1373769882	136.92	99.66	99	97.74	93.26	40.95	99.89	99.99	99.95	99.89
EC337	EC_337_T	TPS	Tumor	846478130	84.65	846420104	84.45	99.77	99	97.8	93.11	41.63	99.98	99.99	99.94	99.84
EC341	EC_341_T	TPS	Tumor	921139526	92.11	921063582	91.89	99.76	99	97.83	93.2	41.24	99.98	99.98	99.92	99.79
EC342	EC_342_T	TPS	Tumor	742868928	74.29	742797188	74.11	99.76	99	97.96	93.73	44.08	99.98	99.97	99.92	99.79
EC343	EC_343_T	TPS	Tumor	1003584516	100.36	1003519524	100.09	99.73	99	98.05	93.84	40.41	99.99	99.98	99.94	99.85
EC344	EC_344_T	TPS	Tumor	943817596	94.38	943758226	94.11	99.72	99	98.25	94.4	40.64	99.99	99.99	99.94	99.85
EC306	EC_306_T	TPS	Tumor	1461612410	146.16	1461363220	145.63	99.63	99	97.8	93.53	48.43	99.85	99.94	99.34	97.65
EC311	EC_311_T	TPS	Tumor	982406498	98.24	982248808	97.97	99.73	99	93.82	85.04	47.43	99.96	99.83	98.19	96.65
EC313	EC_313_T	TPS	Tumor	1427616498	142.76	1427459972	142.24	99.63	99	95.53	88.37	42.95	99.93	99.99	99.93	99.84
EC315	EC_315_T	TPS	Tumor	1183238248	118.32	1183057614	118.1	99.81	99	94.58	86.58	45.8	99.96	99.97	99.76	99.35
EC317	EC_317_T	TPS	Tumor	1441517806	144.15	1441353626	143.51	99.56	99	95.72	88.89	44.3	99.94	99.99	99.95	99.87
EC318	EC_318_T	TPS	Tumor	1152934998	115.29	1152763852	115.05	99.79	99	94.33	86.04	49.13	99.96	99.92	97.04	91.92
EC319	EC_319_T	TPS	Tumor	824324802	82.43	824162160	82.17	99.68	99	94.56	86.45	52.1	99.96	99.93	95.18	80.78
EC321	EC_321_T	TPS	Tumor	1502753546	150.28	1502634470	149.79	99.68	99	95.95	89.37	40.78	99.94	99.99	99.89	99.77
EC322	EC_322_T	TPS	Tumor	1108280114	110.83	1108129758	110.54	99.74	99	95.28	88.01	44.63	99.97	99.99	99.89	99.71
EC323	EC_323_T	TPS	Tumor	1334850944	133.49	1334701850	133.2	99.79	99	94.98	87.44	44.78	99.97	99.99	99.88	99.65
EC324	EC_324_T	TPS	Tumor	1113218522	111.32	1113070098	111.1	99.8	99	94.97	87.35	47.29	99.96	99.89	98.33	96.74
EC325	EC_325_T	TPS	Tumor	1256747072	125.67	1256592486	125.43	99.81	99	94.99	87.5	47.73	99.96	99.92	97.89	95.49
EC326	EC_326_T	TPS	Tumor	1233094254	123.31	1232953858	123.07	99.81	99	95.88	89.35	43.19	99.97	99.99	99.94	99.85
EC330	EC_330_T	TPS	Tumor	1231936488	123.19	1231799612	122.91	99.77	99	94.97	87.35	41.65	99.97	99.99	99.92	99.79
EC331	EC_331_T	TPS	Tumor	1270727356	127.07	1270494992	126.72	99.72	99	94.79	86.74	51.43	99.97	99.93	96.96	86.63
EC332	EC_332_T	TPS	Tumor	816307914	81.63	816176512	81.42	99.74	99	95.1	87.49	48.77	99.97	99.95	99.16	96.86
EC333	EC_333_T	TPS	Tumor	1262891964	126.29	1262760098	125.68	99.52	99	94.44	86.36	42.03	99.96	99.99	99.95	99.86
EC288	EC_288_T	TPS	Tumor	1309644642	130.96	1309531998	130.63	99.75	99	97.66	93	40.99	99.94	100	99.95	99.88
EC312	EC_312_T	TPS	Tumor	1387592216	138.76	1387386108	138.47	99.79	99	94.61	86.5	48.07	99.96	99.95	98.41	95.6
EC328	EC_328_T	TPS	Tumor	1487031726	148.7	1486868288	148.32	99.74	99	96.24	90.15	47.77	99.97	99.95	99.26	98.05
EC140	EC_140_N	TPS	Normal	1273780780	127.38	1273648642	127.13	99.81	99	97.7	92.81	40.93	99.99	99.99	99.96	99.88
EC192	EC_192_N	TPS	Normal	1248523586	124.85	1248418514	124.62	99.81	99	97.79	93.09	41.77	99.99	99.99	99.96	99.9
EC195	EC_195_N	TPS	Normal	852955634	85.3	852882870	85.1	99.77	99	97.99	93.76	41.86	99.98	99.99	99.95	99.87
EC211	EC_211_N	TPS	Normal	894582418	89.46	894509442	89.22	99.74	99	97.82	93.31	40.85	99.98	99.99	99.92	99.82
EC310	EC_310_N	TPS	Normal	1394199270	139.42	1394056354	139	99.7	99	97.8	93.44	41.58	99.88	99.97	99.94	99.88
EC329	EC_329_N	TPS	Normal	1362983030	136.3	1362892862	135.84	99.66	99	97.86	93.61	40.27	99.96	99.99	99.95	99.89
EC337	EC_337_N	TPS	Normal	1023235682	102.32	1023155612	102.1	99.78	99	97.69	92.96	44.29	99.98	99.99	99.93	99.84
EC341	EC_341_N	TPS	Normal	885008154	88.5	884950950	88.25	99.72	99	97.9	93.39	40.64	99.99	99.99	99.92	99.8
EC342	EC_342_N	TPS	Normal	821937252	82.19	821849626	82.01	99.78	99	97.85	93.35	45.66	99.98	99.97	99.91	99.76
EC343	EC_343_N	TPS	Normal	808025816	80.8	807955670	80.62	99.77	99	98.08	93.99	43.42	99.98	99.98	99.94	99.85
EC344	EC_344_N	TPS	Normal	1193037700	119.3	1192931564	119.04	99.78	99	98.21	94.28	43.13	99.99	99.99	99.95	99.87
EC334	EC_334_N	TPS	Normal	1311929228	131.19	1311832324	130.87	99.76	99	97.51	92.56	41.39	99.98	100	99.95	99.89
EC284	EC_284_N	TPS	Normal	1466327694	146.63	1466193302	146.17	99.69	99	97.74	93.36	41.65	99.95	99.99	99.94	99.89
EC287	EC_287_N	TPS	Normal	1319285858	131.93	1319178398	131.53	99.7	99	97.61	92.95	41.38	99.89	100	99.95	99.88
EC291	EC_291_N	TPS	Normal	1654574510	165.46	1654416210	165.03	99.74	99	97.54	92.7	41.59	99.96	99.99	99.96	99.91
EC301	EC_301_N	TPS	Normal	1202585586	120.26	1202476710	119.88	99.68	99	97.43	92.39	41.85	99.94	99.99	99.95	99.88
EC316	EC_316_N	TPS	Normal	1485697084	148.57	1485577040	148.14	99.71	99	96.14	89.81	40.84	99.94	99.99	99.9	99.75
EC320	EC_320_N	TPS	Normal	1383619406	138.36	1383498462	137.99	99.73	99	95.89	89.2	41.63	99.94	99.99	99.9	99.73
EC306	EC_306_N	TPS	Normal	1731232300	173.12	1731003596	172.7	99.76	99	97.99	93.93	42.67	99.95	99.99	99.95	99.85
EC311	EC_311_N	TPS	Normal	845004584	84.5	844872468	84.31	99.77	99	95.09	87.75	48.07	99.96	99.92	98.62	96.85
EC313	EC_313_N	TPS	Normal	997186150	99.72	997024800	99.5	99.78	99	94.5	86.33	49.82	99.96	99.93	97.12	91.15
EC315	EC_315_N	TPS	Normal	295583292	29.56	295544400	29.41	99.49	99	95.11	87.53	42.43	99.89	99.96	99.63	98.56
EC317	EC_317_N	TPS	Normal	1244221360	124.42	1244094650	124.19	99.82	99	94.86	87.1	42.16	99.97	99.98	99.9	99.71
EC318	EC_318_N	TPS	Normal	963623880	96.36	963492588	96.16	99.79	99	95.3	88.23	48.26	99.97	99.92	98.45	96.06
EC319	EC_319_N	TPS	Normal	958399074	95.84	958267422	95.67	99.82	99	95.76	89.21	47.98	99.96	99.93	98.44	96.28
EC321	EC_321_N	TPS	Normal	715098050	71.51	715007484	71.37	99.81	99	95.5	88.76	45.49	99.97	99.82	98.8	97.75
EC322	EC_322_N	TPS	Normal	1301032746	130.1	1300860656	129.85	99.81	99	94.84	87.05	45.71	99.96	99.99	99.92	99.77
EC323	EC_323_N	TPS	Normal	1187671506	118.77	1187553700	118.51	99.78	99	95.22	87.99	41.57	99.97	99.99	99.91	99.77
EC324	EC_324_N	TPS	Normal	1320044198	132	1319865924	131.78	99.83	99	94.99	87.33	44.69	99.97	99.99	99.91	99.73
EC325	EC_325_N	TPS	Normal	1219784114	121.98	1219615378	121.73	99.79	99	94.81	87.07	48.66	99.96	99.91	97.29	93.93
EC326	EC_326_N	TPS	Normal	979422832	97.94	979300882	97.73	99.79	99	95	87.53	47.82	99.96	99.95	98.97	97.28
EC330	EC_330_N	TPS	Normal	1382469858	138.25	1382337006	137.95	99.79	99	95.05	87.52	40.38	99.97	99.99	99.91	99.77
EC331	EC_331_N	TPS	Normal	1188857968	118.89	1188741228	118.65	99.8	99	95.29	88.18	44.72	99.97	99.99	99.87	99.62
EC332	EC_332_N	TPS	Normal	1071612298	107.16	1071451758	106.91	99.77	99	95.35	88.32	49.48	99.97	99.93	97.67	93.55
EC333	EC_333_N	TPS	Normal	932343420	93.23	932185704	92.96	99.71	99	94.63	86.6	51.4	99.96	99.9	92.71	79.38
EC288	EC_288_N	TPS	Normal	457516954	45.75	455352518	45.45	99.34	99	97.53	91.25	44.59	99.8	99.96	98.55	93.41
EC312	EC_312_N	TPS	Normal	486018092	48.6	484443082	48.37	99.52	99	98.53	93.95	44.12	99.88	99.96	98.44	91.98
EC328	EC_328_N	TPS	Normal	392178164	39.22	389261766	38.85	99.07	99	98.6	94.27	39.98	99.72	96.43	79.18	68.72
EC140	EC_140_T	WES	Tumor	388653054	38.87	382720424	38.2	98.29	99	97.87	91.66	44.05	99.97	99.08	94.96	85.17
EC192	EC_192_T	WES	Tumor	330977094	33.1	324040286	32.35	97.74	99	97.62	91.12	44.94	99.94	98.94	94.21	83.18
EC195	EC_195_T	WES	Tumor	356552444	35.66	354017206	35.34	99.12	99	98.26	92.14	44.45	99.96	99.19	95.53	86.13
EC211	EC_211_T	WES	Tumor	352176632	35.22	349799928	34.93	99.19	99	98.36	92.56	44.24	99.95	99.1	95.48	86.74
EC284	EC_284_T	WES	Tumor	467764682	46.78	465926010	46.48	99.37	99	98.14	93.14	43.55	99.85	99.26	95.03	85.1
EC287	EC_287_T	WES	Tumor	399079174	39.91	397401646	39.66	99.37	99	97.66	91.67	44.07	99.84	99.17	94.63	83.98
EC288	EC_288_T	WES	Tumor	382286172	38.23	380621534	37.99	99.38	99	97.62	91.55	44.54	99.81	99.14	94.63	84.41
EC291	EC_291_T	WES	Tumor	441496902	44.15	440505514	43.94	99.52	99	98.79	94.76	44.23	99.9	99.32	95.88	87.18
EC301	EC_301_T	WES	Tumor	390496148	39.05	388657372	38.79	99.32	99	97.54	91.33	44.67	99.81	99.18	94.79	84.32
EC306	EC_306_T	WES	Tumor	414915976	41.49	414003114	41.31	99.56	99	98.82	94.88	44.1	99.9	99.31	95.61	85.68
EC310	EC_310_T	WES	Tumor	423493874	42.35	421821100	42.1	99.41	99	98.36	93.48	44.72	99.86	99.31	95.34	85.17
EC311	EC_311_T	WES	Tumor	421221378	42.12	419678970	41.9	99.47	99	98.38	93.5	44.81	99.87	99.28	94.53	82.52
EC312	EC_312_T	WES	Tumor	433518594	43.35	432082680	43.15	99.52	99	98.51	93.9	44.35	99.87	99.24	94.43	81.95
EC313	EC_313_T	WES	Tumor	420386908	42.04	419585124	41.88	99.62	99	98.56	94.15	43.98	99.87	99.17	94.6	83.86
EC315	EC_315_T	WES	Tumor	456547836	45.65	455667926	45.49	99.64	99	98.53	94.11	45.51	99.86	99.25	94.14	82.46
EC316	EC_316_T	WES	Tumor	427535026	42.75	426656024	42.58	99.6	99	98.6	94.38	43.35	99.85	99.11	94.1	83.01
EC317	EC_317_T	WES	Tumor	359111104	35.91	355453852	35.46	98.73	99	98.11	91.93	44.38	99.92	99.22	95.57	85.57
EC318	EC_318_T	WES	Tumor	373155290	37.32	369314486	36.88	98.83	99	97.98	91.64	44.5	99.93	99.08	94.79	84.43
EC319	EC_319_T	WES	Tumor	419021012	41.9	417811008	41.7	99.51	99	98.08	92.49	42.98	99.85	98.9	91.85	77.07
EC320	EC_320_T	WES	Tumor	383276588	38.33	382058578	38.12	99.46	99	97.6	92.01	43.72	99.78	99.02	93.69	81.7
EC321	EC_321_T	WES	Tumor	377181610	37.72	375262972	37.46	99.32	99	98.28	92.3	43.52	99.84	98.97	94.37	83.39
EC322	EC_322_T	WES	Tumor	416304772	41.63	415207630	41.43	99.52	99	98.13	92.53	43.51	99.87	98.96	92.24	77.92
EC323	EC_323_T	WES	Tumor	378760182	37.88	377582332	37.67	99.46	99	97.85	92.15	43.5	99.7	98.78	91.5	76.98
EC324	EC_324_T	WES	Tumor	369338644	36.93	368309972	36.74	99.49	99	98	92.2	43.99	99.87	99.06	93.38	80.06
EC325	EC_325_T	WES	Tumor	458308168	45.83	456773420	45.59	99.48	99	98.07	92.57	42.36	99.85	98.84	91.88	78.4
EC326	EC_326_T	WES	Tumor	480091160	48.01	477932082	47.67	99.3	99	97.8	92.01	45	99.77	99.37	94.72	83.71
EC328	EC_328_T	WES	Tumor	428256818	42.83	425149972	42.43	99.07	99	98.65	94.39	38.83	99.76	88.67	66.1	55.65
EC329	EC_329_T	WES	Tumor	576210958	57.62	573352580	57.23	99.32	99	98.44	93.46	41.5	99.75	98.86	91.69	79.85
EC330	EC_330_T	WES	Tumor	333756140	33.38	332379426	33.18	99.4	99	98.43	94.48	40.01	99.54	91.61	69	57.53
EC331	EC_331_T	WES	Tumor	360838324	36.08	359528040	35.88	99.45	99	98.24	93.64	39.83	99.66	92.15	70.63	58.45
EC332	EC_332_T	WES	Tumor	771171438	77.12	769270044	76.76	99.54	99	98.76	95.01	40.64	99.79	99.22	93.27	82.5
EC333	EC_333_T	WES	Tumor	577983512	57.8	576771918	57.48	99.45	99	98.29	93.31	42.11	99.85	99.43	97.32	91.41
EC334	EC_334_T	WES	Tumor	494899022	49.49	494582212	49.39	99.81	99	97.82	91.76	42.69	99.87	99.04	94.47	85.55
EC337	EC_337_T	WES	Tumor	539378538	53.94	539262822	53.88	99.89	99	98.48	93.21	42.67	99.93	99	93.91	83.47
EC341	EC_341_T	WES	Tumor	397253968	39.73	397206352	39.68	99.89	99	98.91	94.7	46.32	99.98	99.31	95.49	86.19
EC342	EC_342_T	WES	Tumor	542196116	54.22	542128324	54.17	99.9	99	98.88	94.55	43.91	99.98	99.37	96.44	89.41
EC343	EC_343_T	WES	Tumor	358996782	35.9	358882526	35.83	99.82	99	98.63	93.56	45	99.98	99.01	90.96	72.12
EC344	EC_344_T	WES	Tumor	470032014	47	469979640	46.95	99.89	99	98.69	93.78	44.44	99.98	99.24	95.76	87.36
EC140	EC_140_N	WES	Normal	383239700	38.32	377337466	37.67	98.28	99	97.8	91.43	45.03	99.97	99.11	94.76	84.57
EC192	EC_192_N	WES	Normal	388427952	38.84	380297316	37.97	97.74	99	97.76	91.5	43.92	99.95	99.11	95.15	85.8
EC195	EC_195_N	WES	Normal	348407604	34.84	345931432	34.54	99.13	99	98.3	92.3	44.63	99.95	99.16	95.6	86.52
EC211	EC_211_N	WES	Normal	332645176	33.26	330341654	32.99	99.18	99	98.22	92.08	44.38	99.96	99.08	95.1	85.35
EC284	EC_284_N	WES	Normal	444278834	44.43	442574366	44.16	99.39	99	98.19	93.3	43.65	99.85	99.22	94.69	83.94
EC287	EC_287_N	WES	Normal	404903792	40.49	403250586	40.24	99.38	99	97.7	91.74	44.04	99.8	99.14	94.55	83.94
EC288	EC_288_N	WES	Normal	457516954	45.75	455352518	45.45	99.34	99	97.53	91.25	44.59	99.8	99.27	95.36	86.72
EC291	EC_291_N	WES	Normal	408139414	40.81	407181014	40.64	99.58	99	98.72	94.46	44.28	99.92	99.25	95.3	85.4
EC301	EC_301_N	WES	Normal	381350728	38.14	379720400	37.9	99.37	99	97.67	91.64	44.57	99.82	99.13	94.77	84.53
EC306	EC_306_N	WES	Normal	371261380	37.13	370450168	36.98	99.61	99	98.84	94.93	44.16	99.92	99.19	94.9	84.48
EC310	EC_310_N	WES	Normal	441357294	44.14	439724214	43.9	99.47	99	98.44	93.72	43.55	99.84	99.14	94.7	84.32
EC311	EC_311_N	WES	Normal	481550822	48.16	479932366	47.92	99.51	99	98.49	93.84	44	99.88	99.34	95.53	86
EC312	EC_312_N	WES	Normal	486018092	48.6	484443082	48.37	99.52	99	98.53	93.95	44.12	99.88	99.31	95.06	84.15
EC313	EC_313_N	WES	Normal	437881152	43.79	437038884	43.64	99.66	99	98.55	94.19	44.21	99.87	99.17	94.43	83.5
EC315	EC_315_N	WES	Normal	444981580	44.5	444194514	44.35	99.67	99	98.65	94.45	42.88	99.86	98.98	92.65	78.96
EC316	EC_316_N	WES	Normal	457413458	45.74	456476248	45.58	99.64	99	98.57	94.18	43.17	99.87	99.1	94.13	83.07
EC317	EC_317_N	WES	Normal	362215014	36.22	358701350	35.82	98.9	99	98.12	91.87	43.98	99.93	99	94.15	82.75
EC318	EC_318_N	WES	Normal	354417546	35.44	350783658	35.03	98.84	99	97.98	91.65	43.94	99.94	98.95	93.91	82.34
EC319	EC_319_N	WES	Normal	404438390	40.44	402996278	40.22	99.44	99	98.01	92.46	42.85	99.84	98.88	91.9	78.07
EC320	EC_320_N	WES	Normal	375793402	37.58	374522832	37.38	99.48	99	97.48	91.65	45.54	99.78	99	92.69	79.54
EC321	EC_321_N	WES	Normal	371852794	37.19	369891046	36.93	99.31	99	98.25	92.21	44.79	99.81	99.02	94.15	82.45
EC322	EC_322_N	WES	Normal	529720758	52.97	526910042	52.57	99.25	99	96.86	89.94	47.96	99.78	99.35	94.06	84.52
EC323	EC_323_N	WES	Normal	448728902	44.87	447237164	44.64	99.48	99	98.01	92.39	42.81	99.85	98.99	92.89	80.58
EC324	EC_324_N	WES	Normal	422025612	42.2	420330358	41.96	99.42	99	97.51	91.52	43.35	99.82	99.1	93.57	81.19
EC325	EC_325_N	WES	Normal	412275138	41.23	410888438	40.98	99.4	99	98.17	93.07	42.7	99.79	98.8	91.36	76.96
EC326	EC_326_N	WES	Normal	715003424	71.5	713293942	71.2	99.59	99	98.1	92.3	41.58	99.87	99.32	95.02	86.33
EC328	EC_328_N	WES	Normal	392178164	39.22	389261766	38.85	99.07	99	98.6	94.27	39.98	99.72	91.9	68.98	56.99
EC329	EC_329_N	WES	Normal	461948332	46.19	458027524	45.72	98.98	99	98.5	93.98	39.17	99.7	90.94	69.39	59.4
EC330	EC_330_N	WES	Normal	408499792	40.85	406741628	40.6	99.39	99	98.44	94.49	39.32	99.55	90.78	68.06	57.45
EC331	EC_331_N	WES	Normal	369041378	36.9	367883930	36.72	99.51	99	98.35	93.92	39.24	99.67	88.39	67.04	56.17
EC332	EC_332_N	WES	Normal	874661576	87.47	872555826	87.09	99.57	99	98.81	95.09	40.73	99.82	99.41	94.78	85.76
EC333	EC_333_N	WES	Normal	508362074	50.84	507041452	50.64	99.61	99	96.57	90.33	38.97	99.35	89.06	65.73	56.38
EC334	EC_334_N	WES	Normal	818295178	81.83	818196006	81.74	99.89	99	97.94	92.11	43.98	99.86	99.21	95.38	88.21
EC337	EC_337_N	WES	Normal	636707384	63.67	636646888	63.61	99.9	99	98.5	93.32	42.44	99.96	99.06	94.54	85.9
EC341	EC_341_N	WES	Normal	466516736	46.65	466420902	46.6	99.9	99	98.66	93.65	46.03	99.97	99.39	95.87	86.96
EC342	EC_342_N	WES	Normal	256808956	25.68	256785056	25.66	99.92	99	98.76	94.16	46.93	99.98	99.19	96.06	88.28
EC343	EC_343_N	WES	Normal	369968198	37	369842460	36.92	99.8	99	98.41	92.82	47.49	99.97	99.17	90.63	72.86
EC344	EC_344_N	WES	Normal	374942502	37.49	374886970	37.45	99.89	99	98.67	93.81	46.39	99.97	99.26	94.94	83.98
TPS, targeted panel sequencing; WES, whole exon sequencing.

## Sheet: Table S4
Table S4. The number of pathogenic mutations in EC patients
Patient ID	# of pathogenic mutations					# of the same mutations
	Tumor (WES)	Tumor (TPS)	PIP-E	PAP-C	SWAB-V	WES and TPS	Tumor (TPS) and PIP-E	Tumor (TPS) and PAP-C	Tumor (TPS) and SWAB-V
EC140	2	2	2	2	NA	2	2	2	NA
EC192	2	2	NA	NA	NA	2	NA	NA	NA
EC195	6	6	NA	0	NA	6	NA	0	NA
EC211	44	30	NA	0	5	27	NA	0	5
EC284	7	6	0	0	NA	5	0	0	NA
EC287	1	1	1	1	NA	1	1	1	NA
EC288	0	1	1	1	NA	0	1	1	NA
EC291	4	3	3	2	2	2	2	2	2
EC301	13	12	12	2	8	12	11	2	8
EC306	3	4	3	1	2	3	2	1	2
EC310	37	31	39	25	31	26	26	23	25
EC311	1	1	1	NA	NA	0	1	NA	NA
EC312	3	3	0	0	NA	3	0	0	NA
EC313	0	1	1	NA	0	0	1	NA	0
EC315	2	1	2	1	1	1	1	1	1
EC316	9	6	7	6	3	5	6	5	3
EC317	4	4	0	0	NA	4	0	0	NA
EC318	1	0	NA	2	0	0	NA	0	0
EC319	10	4	5	0	0	4	3	0	0
EC320	2	2	2	2	NA	2	2	2	NA
EC321	5	3	1	3	2	3	1	3	2
EC322	84	72	69	73	NA	71	65	68	NA
EC323	3	2	0	NA	NA	2	0	NA	NA
EC324	12	7	6	2	0	7	5	2	0
EC325	0	0	7	0	0	0	0	0	0
EC326	7	5	5	1	0	5	4	1	0
EC328	0	0	1	0	NA	0	0	0	NA
EC329	0	0	0	0	0	0	0	0	0
EC330	1	1	NA	0	NA	1	NA	0	NA
EC331	7	2	NA	NA	0	1	NA	NA	0
EC332	0	0	NA	0	NA	0	NA	0	NA
EC333	9	10	10	3	NA	8	9	3	NA
EC334	9	4	NA	NA	NA	4	NA	NA	NA
EC337	7	6	NA	NA	NA	6	NA	NA	NA
EC341	1	1	NA	NA	NA	1	NA	NA	NA
EC342	2	2	NA	NA	NA	2	NA	NA	NA
EC343	1	1	1	0	0	1	1	0	0
EC344	2	2	1	0	0	2	1	0	0

## Sheet: Table S5
Table S5. Indices for clinical risk stratification
Patient ID	Sample ID	Sequencing strategy	Functional_Mutation	Indel_Burden	TMB	LOH	TAI	LST	HRD score	MSI Status
EC140	EC_140_T	WES	48	3	1.44	0	0	0	0	MSS
EC140	EC_140_T	TPS	49	3	1.47	0	0	0	0	MSS
EC140	EC_140_PAP	TPS	11	0	4.47	0	0	0	0	MSI-H
EC140	EC_140_PIP	TPS	39	1	15.84	0	0	0	0	MSI-H
EC192	EC_192_T	WES	36	2	1.08	3	4	1	8	MSS
EC192	EC_192_T	TPS	39	2	1.17	3	4	2	9	MSS
EC195	EC_195_T	WES	1063	296	31.82	0	0	0	0	MSI-H
EC195	EC_195_T	TPS	850	173	25.44	0	0	1	1	MSI-H
EC195	EC_195_PAP	TPS	6	2	2.44	0	0	0	0	MSI-H
EC211	EC_211_T	WES	9871	48	295.49	0	0	0	0	MSS
EC211	EC_211_T	TPS	7412	24	221.88	0	0	0	0	MSS
EC211	EC_211_PAP	TPS	1	0	0.41	0	2	0	2	MSI-H
EC211	EC_211_SWAB	TPS	8	0	3.25	0	0	0	0	S
EC284	EC_284_T	WES	43	3	1.29	0	0	0	0	MSS
EC284	EC_284_T	TPS	12	0	4.87	0	0	0	0	MSS
EC284	EC_284_PAP	TPS	0	0	0	0	0	0	0	MSS
EC284	EC_284_PIP	TPS	192	2	77.97	0	0	0	0	MSI-H
EC287	EC_287_T	WES	15	0	0.45	0	1	2	3	MSS
EC287	EC_287_T	TPS	17	0	6.9	0	0	0	0	MSS
EC287	EC_287_PAP	TPS	7	0	2.84	0	0	0	0	MSS
EC287	EC_287_PIP	TPS	28	0	11.37	6	12	6	24	MSI-H
EC288	EC_288_T	WES	0	0	0	0	0	0	0	MSS
EC288	EC_288_T	TPS	1	0	0.41	0	0	0	0	MSS
EC288	EC_288_PAP	TPS	0	0	0	0	0	0	0	MSS
EC288	EC_288_PIP	TPS	8	0	3.25	1	2	2	5	MSS
EC291	EC_291_T	WES	905	60	27.09	0	0	0	0	MSI-H
EC291	EC_291_T	TPS	650	22	263.97	0	0	0	0	MSI-H
EC291	EC_291_PAP	TPS	59	2	23.96	0	0	0	0	MSS
EC291	EC_291_PIP	TPS	649	12	263.57	1	1	0	2	MSI-H
EC291	EC_291_SWAB	TPS	585	10	237.57	0	0	0	0	MSI-H
EC301	EC_301_T	WES	1533	234	45.89	0	0	0	0	MSI-H
EC301	EC_301_T	TPS	1056	78	428.85	0	0	0	0	MSI-H
EC301	EC_301_PAP	TPS	0	0	0	0	0	0	0	MSS
EC301	EC_301_PIP	TPS	1142	84	463.78	0	0	0	0	MSI-H
EC301	EC_301_SWAB	TPS	211	14	85.69	0	0	0	0	MSI-H
EC306	EC_306_T	WES	52	4	1.56	1	1	1	3	MSS
EC306	EC_306_T	TPS	37	1	15.03	1	1	1	3	MSS
EC306	EC_306_PAP	TPS	33	1	13.4	0	0	0	0	MSS
EC306	EC_306_PIP	TPS	41	3	16.65	1	1	1	3	MSS
EC306	EC_306_SWAB	TPS	33	3	13.4	0	1	1	2	MSS
EC310	EC_310_T	WES	8015	31	239.93	2	1	1	4	MSS
EC310	EC_310_T	TPS	6917	25	207.06	1	1	1	3	MSS
EC310	EC_310_PAP	TPS	4738	2	1924.15	0	0	0	0	MSS
EC310	EC_310_PIP	TPS	7063	22	211.43	2	1	1	4	MSS
EC310	EC_310_SWAB	TPS	5443	7	162.94	0	0	1	1	MSS
EC311	EC_311_T	WES	79	4	2.36	13	19	12	44	MSS
EC311	EC_311_T	TPS	8	0	3.25	12	15	9	36	MSS
EC311	EC_311_PIP	TPS	9	2	3.65	10	12	8	30	MSS
EC312	EC_312_T	WES	25	2	0.75	1	1	1	3	MSS
EC312	EC_312_T	TPS	6	1	2.44	0	0	0	0	MSS
EC312	EC_312_PAP	TPS	9	3	3.65	0	0	0	0	MSS
EC312	EC_312_PIP	TPS	20	5	8.12	0	0	0	0	MSS
EC313	EC_313_T	WES	8	0	0.24	0	0	0	0	MSS
EC313	EC_313_T	TPS	3	0	1.22	0	0	0	0	MSS
EC313	EC_313_PIP	TPS	11	0	4.47	3	2	4	9	MSS
EC313	EC_313_SWAB	TPS	3	0	1.22	0	0	2	2	MSS
EC315	EC_315_T	WES	44	2	1.32	1	3	3	7	MSS
EC315	EC_315_T	TPS	29	1	11.78	0	0	0	0	MSS
EC315	EC_315_PAP	TPS	0	0	0	0	0	3	3	MSS
EC315	EC_315_PIP	TPS	30	1	12.18	1	2	1	4	MSS
EC315	EC_315_SWAB	TPS	25	1	10.15	0	1	1	2	MSS
EC316	EC_316_T	WES	1102	227	32.99	1	1	0	2	MSI-H
EC316	EC_316_T	TPS	748	55	303.77	0	0	0	0	MSI-H
EC316	EC_316_PAP	TPS	781	64	317.17	1	1	4	6	MSI-H
EC316	EC_316_PIP	TPS	786	67	319.2	0	4	3	7	MSI-H
EC316	EC_316_SWAB	TPS	396	31	160.82	0	0	0	0	MSI-H
EC317	EC_317_T	WES	61	6	1.83	0	1	0	1	MSS
EC317	EC_317_T	TPS	27	2	10.96	0	0	2	2	MSS
EC317	EC_317_PAP	TPS	9	0	3.65	0	1	1	2	MSS
EC317	EC_317_PIP	TPS	31	3	12.59	1	1	1	3	MSS
EC318	EC_318_T	WES	16	3	0.48	0	0	0	0	MSS
EC318	EC_318_T	TPS	0	0	0	1	1	0	2	MSS
EC318	EC_318_PAP	TPS	0	0	0	0	0	2	2	MSS
EC318	EC_318_SWAB	TPS	0	0	0	0	0	2	2	MSS
EC319	EC_319_T	WES	872	209	26.1	2	3	3	8	MSI-H
EC319	EC_319_T	TPS	362	46	147.01	2	2	3	7	MSI-H
EC319	EC_319_PAP	TPS	0	0	0	0	0	0	0	MSS
EC319	EC_319_PIP	TPS	319	36	129.55	1	2	3	6	MSI-H
EC319	EC_319_SWAB	TPS	0	0	0	0	1	1	2	MSS
EC320	EC_320_T	WES	61	4	1.83	1	3	0	4	MSS
EC320	EC_320_T	TPS	42	1	17.06	1	2	0	3	MSS
EC320	EC_320_PAP	TPS	33	0	13.4	0	0	3	3	MSS
EC320	EC_320_PIP	TPS	44	1	17.87	1	2	0	3	MSS
EC321	EC_321_T	WES	1119	363	33.5	1	1	1	3	MSI-H
EC321	EC_321_T	TPS	598	85	242.85	1	1	1	3	MSI-H
EC321	EC_321_PAP	TPS	33	8	13.4	0	0	0	0	MSS
EC321	EC_321_PIP	TPS	540	60	219.3	1	1	1	3	MSI-H
EC321	EC_321_SWAB	TPS	502	45	203.87	1	1	2	4	MSI-H
EC322	EC_322_T	WES	15823	182	473.67	0	1	1	2	MSI-H
EC322	EC_322_T	TPS	13217	26	5367.55	0	0	0	0	MSI-H
EC322	EC_322_PAP	TPS	8342	5	3387.77	0	0	0	0	MSS
EC322	EC_322_PIP	TPS	12958	26	5262.37	0	2	0	2	MSI-H
EC323	EC_323_T	WES	47	8	1.41	1	1	1	3	MSS
EC323	EC_323_T	TPS	14	1	5.69	0	2	1	3	MSS
EC323	EC_323_PIP	TPS	22	7	8.93	0	0	0	0	MSS
EC324	EC_324_T	WES	1428	6	42.75	3	5	6	14	MSS
EC324	EC_324_T	TPS	464	1	188.43	3	5	4	12	MSS
EC324	EC_324_PAP	TPS	1	0	0.41	0	0	0	0	MSS
EC324	EC_324_PIP	TPS	371	0	150.67	0	0	0	0	MSS
EC324	EC_324_SWAB	TPS	81	26	32.89	0	0	0	0	MSS
EC325	EC_325_T	WES	0	0	0	0	0	0	0	MSS
EC325	EC_325_T	TPS	1	1	0.41	0	0	0	0	MSS
EC325	EC_325_PAP	TPS	2	0	0.81	0	0	0	0	MSS
EC325	EC_325_PIP	TPS	250	0	101.53	3	4	2	9	MSS
EC325	EC_325_SWAB	TPS	0	0	0	0	0	0	0	MSS
EC326	EC_326_T	WES	628	2	18.8	0	0	0	0	MSS
EC326	EC_326_T	TPS	537	0	218.08	0	0	0	0	MSS
EC326	EC_326_PAP	TPS	0	0	0	0	0	1	1	MSS
EC326	EC_326_PIP	TPS	576	2	233.92	1	3	0	4	MSS
EC326	EC_326_SWAB	TPS	3	0	1.22	0	0	0	0	MSI-H
EC328	EC_328_T	WES	9	1	0.27	2	1	0	3	MSS
EC328	EC_328_T	TPS	5	2	2.03	2	1	0	3	MSS
EC328	EC_328_PAP	TPS	7	3	2.84	0	0	0	0	MSS
EC328	EC_328_PIP	TPS	6	0	2.44	2	1	0	3	MSS
EC329	EC_329_T	WES	5	0	0.15	0	3	2	5	MSS
EC329	EC_329_T	TPS	3	0	0.09	0	1	1	2	MSS
EC329	EC_329_PAP	TPS	2	0	0.06	0	0	0	0	MSS
EC329	EC_329_PIP	TPS	12	2	0.36	0	0	1	1	MSS
EC329	EC_329_SWAB	TPS	8	1	0.24	0	0	0	0	MSS
EC330	EC_330_T	WES	31	1	0.93	0	0	0	0	MSS
EC330	EC_330_T	TPS	20	0	8.12	0	0	0	0	MSS
EC330	EC_330_PAP	TPS	0	0	0	0	0	0	0	MSS
EC331	EC_331_T	WES	615	150	18.41	0	0	0	0	MSI-H
EC331	EC_331_T	TPS	115	44	46.7	2	2	2	6	MSI-H
EC331	EC_331_SWAB	TPS	0	0	0	0	0	0	0	MSS
EC332	EC_332_T	WES	2	0	0.06	0	0	0	0	MSS
EC332	EC_332_T	TPS	3	0	1.22	0	0	0	0	MSS
EC332	EC_332_PAP	TPS	0	0	0	0	0	0	0	MSS
EC333	EC_333_T	WES	971	123	29.07	0	0	0	0	MSI-H
EC333	EC_333_T	TPS	728	32	295.65	0	2	2	4	MSI-H
EC333	EC_333_PAP	TPS	105	7	42.64	0	0	2	2	MSS
EC333	EC_333_PIP	TPS	624	14	253.41	0	4	2	6	MSS
EC334	EC_334_T	WES	1089	280	32.6	1	1	0	2	MSI-H
EC334	EC_334_T	TPS	163	83	66.2	1	1	0	2	MSI-H
EC337	EC_337_T	WES	1578	3	47.24	0	0	0	0	MSS
EC337	EC_337_T	TPS	1271	0	38.05	0	0	0	0	MSS
EC341	EC_341_T	WES	55	3	1.65	6	10	11	27	MSS
EC341	EC_341_T	TPS	41	1	1.23	4	8	10	22	MSS
EC342	EC_342_T	WES	42	5	1.26	0	0	0	0	MSS
EC342	EC_342_T	TPS	22	0	0.66	0	0	0	0	MSS
EC343	EC_343_T	WES	59	6	1.77	1	1	1	3	MSS
EC343	EC_343_T	TPS	46	4	1.38	0	1	1	2	MSS
EC343	EC_343_PAP	TPS	8	1	0.24	0	0	0	0	MSS
EC343	EC_343_PIP	TPS	40	6	1.2	0	1	0	1	MSS
EC343	EC_343_SWAB	TPS	23	8	0.69	0	0	0	0	MSS
EC344	EC_344_T	WES	20	2	0.6	0	0	0	0	MSS
EC344	EC_344_T	TPS	15	1	0.45	0	0	0	0	MSS
EC344	EC_344_PAP	TPS	1	0	0.03	0	0	0	0	MSS
EC344	EC_344_PIP	TPS	4	0	0.12	0	0	0	0	MSS
EC344	EC_344_SWAB	TPS	3	0	0.09	0	0	0	0	MSS

## Sheet: Table S6
Table S6. The number of pathogenic mutations in women at high risk of EC
Patient ID	Group	PIP-E	PAP-C	SWAB-V
EC039	HR-NT	0	0	0
EC042	HR-NT	2	NA	2
EC045	HR-NT	0	NA	0
EC046	HR-NT	1	1	NA
EC047	HR-NT	0	0	NA
EC048	HR-NT	NA	1	1
EC049	HR-NT	0	0	0
EC050	HR-NT	0	0	NA
EC051	HR-NT	0	0	0
EC052	HR-NT	NA	0	0
EC053	HR-NT	0	0	NA
EC054	HR-NT	0	0	1
EC055	HR-NT	0	0	0
EC056	HR-NT	0	0	0
EC057	HR-NT	1	1	NA
EC058	HR-NT	0	0	NA
EC059	HR-NT	2	NA	NA
EC061	HR-NT	0	0	0
EC062	HR-NT	1	0	NA
EC063	HR-NT	0	1	0
EC066	HR-NT	NA	0	0
EC067	HR-NT	1	2	0
EC068	HR-NT	1	NA	NA
EC069	HR-NT	0	0	NA
EC070	HR-NT	2	0	NA
EC071	HR-NT	0	0	0
EC072	HR-NT	1	NA	NA
EC073	HR-NT	0	0	NA
EC079	HR-NT	0	0	0
EC081	HR-NT	0	NA	0
EC086	HR-NT	1	1	0
EC087	HR-NT	0	0	0
EC088	HR-NT	2	2	2
EC089	HR-NT	0	0	0
EC090	HR-NT	0	0	0
EC094	HR-NT	0	0	0
EC095	HR-NT	0	0	NA
EC096	HR-NT	1	1	NA
EC097	HR-NT	0	0	0
EC098	HR-NT	2	0	3
EC099	HR-NT	1	0	NA
EC100	HR-NT	0	0	0
EC101	HR-NT	0	1	NA
EC102	HR-NT	NA	1	1
EC104	HR-NT	1	0	0
EC105	HR-NT	1	NA	1
EC106	HR-NT	0	0	0
EC108	HR-NT	NA	0	0
EC109	HR-NT	NA	0	NA
EC110	HR-NT	NA	1	2
EC111	HR-NT	NA	0	0
EC112	HR-NT	NA	0	1
EC113	HR-NT	NA	1	1
EC114	HR-NT	NA	0	0
EC116	HR-NT	NA	0	0
EC117	HR-NT	NA	0	0
EC118	HR-NT	NA	1	1
EC120	HR-NT	NA	1	1
EC121	HR-NT	NA	0	0
EC122	HR-NT	NA	1	1
EC124	HR-NT	0	0	NA
EC125	HR-NT	0	0	0
EC126	HR-NT	0	0	0
EC127	HR-NT	0	0	0
EC128	HR-NT	0	0	0
EC129	HR-NT	0	0	0
EC130	HR-NT	0	0	0
EC131	HR-NT	1	1	1
EC132	HR-NT	0	0	0
EC133	HR-NT	0	0	0
EC134	HR-NT	1	0	1
EC135	HR-NT	0	0	0
EC136	HR-NT	2	2	2
EC137	HR-NT	0	0	0
EC138	HR-NT	0	0	0
EC139	HR-NT	1	1	1
EC141	HR-NT	1	1	1
EC143	HR-NT	0	0	0
EC144	HR-NT	1	0	1
EC145	HR-NT	0	0	0
EC146	HR-NT	0	0	0
EC147	HR-NT	0	0	0
EC148	HR-NT	0	0	0
EC149	HR-NT	0	0	0
EC150	HR-NT	0	0	0
EC151	HR-NT	0	0	0
EC153	HR-NT	1	1	1
EC154	HR-NT	0	0	0
EC155	HR-NT	0	0	0
EC156	HR-NT	0	0	0
EC157	HR-NT	0	0	0
EC158	HR-NT	0	1	1
EC159	HR-NT	0	0	0
EC160	HR-NT	0	0	0
EC161	HR-NT	1	1	0
EC162	HR-NT	1	1	1
EC163	HR-NT	0	0	0
EC164	HR-NT	0	0	0
EC165	HR-NT	0	NA	1
EC166	HR-NT	1	2	0
EC168	HR-NT	2	2	NA
EC169	HR-NT	1	1	1
EC170	HR-NT	1	0	0
EC171	HR-NT	1	1	1
EC173	HR-NT	1	0	1
EC174	HR-NT	0	0	1
EC175	HR-NT	1	1	1
EC176	HR-NT	1	1	2
EC177	HR-NT	0	0	0
EC178	HR-NT	0	0	0
EC179	HR-NT	0	0	0
EC182	HR-NT	1	1	1
EC183	HR-NT	0	0	0
EC185	HR-NT	1	0	1
EC186	HR-NT	1	1	1
EC187	HR-NT	0	0	0
EC188	HR-NT	0	0	0
EC189	HR-NT	2	2	2
EC190	HR-NT	0	0	0
EC191	HR-NT	0	1	1
EC193	HR-NT	0	0	0
EC196	HR-NT	1	1	1
EC198	HR-NT	0	3	1
EC199	HR-NT	0	0	0
EC200	HR-NT	0	0	0
EC201	HR-NT	0	NA	0
EC202	HR-NT	0	0	0
EC203	HR-NT	1	1	1
EC204	HR-NT	3	2	3
EC205	HR-NT	0	0	0
EC206	HR-NT	0	0	0
EC207	HR-NT	1	1	1
EC208	HR-NT	1	2	2
EC212	HR-NT	2	2	2
EC213	HR-NT	1	1	1
EC214	HR-NT	0	1	1
EC215	HR-NT	1	1	1
EC216	HR-NT	0	0	0
EC217	HR-NT	1	2	2
EC218	HR-NT	0	0	0
EC219	HR-NT	0	0	0
EC220	HR-NT	1	1	1
EC221	HR-NT	0	0	0
EC222	HR-NT	0	0	0
EC223	HR-NT	0	0	0
EC225	HR-NT	1	0	0
EC227	HR-NT	0	0	0
EC229	HR-NT	0	0	0
EC230	HR-NT	0	0	0
EC232	HR-NT	0	0	0
EC233	HR-NT	0	0	0
EC234	HR-NT	0	0	0
EC235	HR-NT	0	0	0
EC236	HR-NT	2	1	2
EC237	HR-NT	0	0	0
EC238	HR-NT	0	0	0
EC240	HR-NT	0	0	0
EC241	HR-NT	1	1	1
EC242	HR-NT	NA	0	0
EC243	HR-NT	0	0	0
EC244	HR-NT	2	2	2
EC246	HR-NT	1	1	1
EC247	HR-NT	0	0	0
EC248	HR-NT	1	1	1
EC249	HR-NT	0	0	0
EC250	HR-NT	1	1	1
EC251	HR-NT	0	0	0
EC252	HR-NT	0	0	0
EC253	HR-NT	0	0	0
EC254	HR-NT	1	1	1
EC256	HR-NT	1	1	0
EC259	HR-NT	NA	0	0
EC260	HR-NT	0	0	0
EC261	HR-NT	0	0	0
EC262	HR-NT	0	0	0
EC263	HR-NT	0	0	0
EC264	HR-NT	0	0	0
EC266	HR-NT	0	0	0
EC267	HR-NT	1	1	1
EC268	HR-NT	0	0	0
EC269	HR-NT	1	0	2
EC270	HR-NT	0	0	0
EC272	HR-NT	0	0	0
EC273	HR-NT	0	1	0
EC274	HR-NT	1	1	1
EC275	HR-NT	1	1	1
EC276	HR-NT	1	1	1
EC277	HR-NT	1	1	1
EC278	HR-NT	0	0	0
EC279	HR-NT	0	0	1
EC280	HR-NT	2	3	2
EC281	HR-NT	2	2	0
EC282	HR-NT	0	0	0
EC283	HR-NT	0	0	0
EC286	HR-NT	1	1	1
EC290	HR-NT	0	0	0
EC292	HR-NT	0	0	0
EC294	HR-NT	1	0	0
EC295	HR-NT	1	1	0
EC296	HR-NT	1	1	0
EC297	HR-NT	0	0	0
EC298	HR-NT	1	1	1
EC299	HR-NT	1	1	1
EC300	HR-NT	0	0	0
EC304	HR-NT	0	0	0
EC307	HR-NT	0	0	0
EC308	HR-NT	NA	0	0
EC338	HR-NT	0	0	0
